# Supplementary material for: Evapotranspiration dynamics and their drivers in a temperate mixed forest in northeast China
Source: PeerJ. 2022 Jun 8;10:e13549. doi: 10.7717/peerj.13549 (PMC9188314; doi:10.7717/peerj.13549)
Supplement: Supplemental Information 1 — Based on the 30-min data, daily and annual values can be obtained. [file peerj-10-13549-s001.xlsx]

## Sheet: Sheet1
Year	Month	Day	Hour	minute	DOY	Day(1) or Night(-9999)	ET(mm hour-1)	Ta(℃)	RH（%）	Precipitation（mm)	VPD(kPa)	LAI	H(W m-2)	G(W m-2)	fitered_ET(mm hour-1)	Measured Rg（W m-2）
2016	1	1	0	0	1	-9999	-0.000821146	-24.35	77	0	0.065746	0.2	-21.913	-2.35635	-9999	0
2016	1	1	0	30	1	-9999	-0.00217858	-24.2	75	0	0.064907	0.2	-18.8009	-2.35317	-9999	0.075
2016	1	1	1	0	1	-9999	-0.00217858	-24.6	76	0	0.0634485	0.2	-18.8009	-2.35	-9999	0.15
2016	1	1	1	30	1	-9999	-0.00217858	-25	77	0	0.0620037	0.2	-18.8009	-2.35	-9999	0.225
2016	1	1	2	0	1	-9999	-0.00217858	-24.8	76	0	0.0623143	0.2	-18.8009	-2.35	-9999	0.3
2016	1	1	2	30	1	-9999	-0.00217858	-24.6	75	0	0.0626136	0.2	-18.8009	-2.34959	-9999	0.15
2016	1	1	3	0	1	-9999	-0.00332489	-24.2	76	0	0.0657724	0.2	-22.5455	-2.34918	-9999	0
2016	1	1	3	30	1	-9999	-0.00332489	-23.8	77	0	0.0690695	0.2	-13.5145	-2.33811	-9999	0
2016	1	1	4	0	1	-9999	-0.00280735	-23.65	77	0	0.0700017	0.2	-17.8288	-2.32705	-9999	0
2016	1	1	4	30	1	-9999	-0.00344049	-23.5	77	0	0.0709451	0.2	-24.992	-2.33689	-9999	0.1
2016	1	1	5	0	1	-9999	-0.00411362	-23.1	77.5	0	0.0739944	0.2	-37.191	-2.34672	-9999	0.2
2016	1	1	5	30	1	-9999	-0.00423144	-22.7	78	0	0.0771614	0.2	-39.601	-2.34836	-9999	0.1
2016	1	1	6	0	1	-9999	-0.00437616	-22.45	78	0	0.0788863	0.2	-40.7933	-2.35	-9999	0
2016	1	1	6	30	1	-9999	-0.00447149	-22.2	78	0	0.0806457	0.2	-42.0244	-2.35	-9999	0.2
2016	1	1	7	0	1	-9999	-0.00388267	-21.7	78	0	0.0842704	0.2	-40.5414	-2.35	-9999	0.4
2016	1	1	7	30	1	1	-0.0038455	-21.2	78	0	0.0880403	0.2	-40.2209	-2.35	-9999	6.85
2016	1	1	8	0	1	1	-0.00390031	-20.5	78.5	0	0.0941718	0.2	-41.064	-2.35	-9999	13.3
2016	1	1	8	30	1	1	-0.00324876	-19.8	79	0	0.100687	0.2	-36.2459	-2.34795	-9999	26.8
2016	1	1	9	0	1	1	-0.00205404	-19.15	78.5	0	0.1058	0.2	-29.2553	-2.3459	-9999	40.3
2016	1	1	9	30	1	1	-0.00114696	-18.5	78	0	0.111132	0.2	-26.1308	-2.33238	-9999	53.75
2016	1	1	10	0	1	1	0.000643802	-17.75	78	0	0.118442	0.2	-18.2336	-2.31885	-9999	67.2
2016	1	1	10	30	1	1	0.00343556	-17	78	0	0.126178	0.2	-1.96962	-2.3209	-9999	63.8
2016	1	1	11	0	1	1	0.0067206	-15.45	76.5	0	0.140851	0.2	16.0075	-2.32295	-9999	60.4
2016	1	1	11	30	1	1	0.00759785	-13.9	75	0	0.156893	0.2	26.1227	-2.31148	-9999	72.1
2016	1	1	12	0	1	1	0.00848008	-13.35	75	0	0.164095	0.2	33.7823	-2.3	-9999	83.8
2016	1	1	12	30	1	1	0.0103713	-12.8	75	0	0.17159	0.2	54.9239	-2.3	-9999	91
2016	1	1	13	0	1	1	0.010737	-12.55	76.5	0	0.178599	0.2	50.4919	-2.3	-9999	98.2
2016	1	1	13	30	1	1	0.0110589	-12.3	78	0	0.185814	0.2	52.8413	-2.3	-9999	70.65
2016	1	1	14	0	1	1	0.0110589	-12.2	80	0	0.192121	0.2	52.8413	-2.3	-9999	43.1
2016	1	1	14	30	1	1	0.0110797	-12.1	82	0.2	0.198517	0.2	46.0635	-2.28361	-9999	28.35
2016	1	1	15	0	1	1	0.0110589	-12.2	83	0	0.199326	0.2	52.8413	-2.26721	-9999	13.6
2016	1	1	15	30	1	-9999	0.0100357	-12.3	84	0	0.200107	0.2	44.8826	-2.25861	-9999	6.8
2016	1	1	16	0	1	-9999	0.0100357	-12.2	84	0	0.201727	0.2	44.8826	-2.25	-9999	0
2016	1	1	16	30	1	-9999	0.00990737	-12.1	84	0	0.203359	0.2	37.9361	-2.25	-9999	0
2016	1	1	17	0	1	-9999	0.0100357	-12.15	84.5	0	0.203747	0.2	44.8826	-2.25	-9999	0
2016	1	1	17	30	1	-9999	0.0100357	-12.2	85	0	0.204129	0.2	44.8826	-2.25	-9999	0
2016	1	1	18	0	1	-9999	0.0100357	-12.25	85	0	0.203308	0.2	44.8826	-2.25	-9999	0
2016	1	1	18	30	1	-9999	0.0100357	-12.3	85	0	0.202489	0.2	44.8826	-2.25	-9999	0
2016	1	1	19	0	1	-9999	0.0100357	-12.35	85	0	0.201674	0.2	44.8826	-2.25	-9999	0
2016	1	1	19	30	1	-9999	0.0100357	-12.4	85	0.1	0.200862	0.2	44.8826	-2.25	-9999	0
2016	1	1	20	0	1	-9999	0.0100357	-12.45	85.5	0	0.20123	0.2	44.8826	-2.25	-9999	0
2016	1	1	20	30	1	-9999	0.0100357	-12.5	86	0	0.20159	0.2	44.8826	-2.24549	-9999	0
2016	1	1	21	0	1	-9999	0.0100357	-12.5	86	0	0.20159	0.2	44.8826	-2.24098	-9999	0
2016	1	1	21	30	1	-9999	0.0100357	-12.5	86	0	0.20159	0.2	44.8826	-2.22869	-9999	0
2016	1	1	22	0	1	-9999	0.0100357	-12.45	86	0	0.202406	0.2	44.8826	-2.21639	-9999	0
2016	1	1	22	30	1	-9999	0.0100357	-12.4	86	0	0.203225	0.2	44.8826	-2.20984	-9999	0
2016	1	1	23	0	1	-9999	0.0100357	-12.6	82	0	0.190667	0.2	44.8826	-2.20328	-9999	0
2016	1	1	23	30	1	-9999	0.00981027	-12.8	78	0	0.178454	0.2	50.4364	-2.21352	-9999	0
2016	1	2	0	0	2	-9999	0.00807932	-13.35	77	0	0.168471	0.2	30.7906	-2.22377	-9999	0
2016	1	2	0	30	2	-9999	0.00726781	-13.9	76	0	0.158985	0.2	23.7609	-2.23689	-9999	0
2016	1	2	1	0	2	-9999	0.00609488	-14.45	75	0	0.149974	0.2	13.3057	-2.25	-9999	0
2016	1	2	1	30	2	-9999	0.00620127	-15	74	0	0.141418	0.2	14.1986	-2.25	-9999	0
2016	1	2	2	0	2	-9999	0.00508728	-15.65	76	0	0.137627	0.2	6.60538	-2.25	-9999	0
2016	1	2	2	30	2	-9999	0.00324072	-16.3	78	0	0.133803	0.2	-2.9878	-2.25041	-9999	0
2016	1	2	3	0	2	-9999	0.0020341	-16.9	78	0	0.127243	0.2	-8.70954	-2.25082	-9999	0
2016	1	2	3	30	2	-9999	0.000640434	-17.5	78	0	0.120972	0.2	-16.9423	-2.25328	-9999	0
2016	1	2	4	0	2	-9999	-0.00163411	-18.65	79	0	0.111126	0.2	-29.2656	-2.25574	-9999	0
2016	1	2	4	30	2	-9999	-0.00313987	-19.8	80	0	0.101962	0.2	-36.9175	-2.275	-9999	0
2016	1	2	5	0	2	-9999	-0.00347117	-20.25	81.5	0	0.0999125	0.2	-38.5093	-2.29426	-9999	0
2016	1	2	5	30	2	-9999	-0.00369131	-20.7	83	0	0.0978555	0.2	-39.8928	-2.29713	-9999	0
2016	1	2	6	0	2	-9999	-0.00375524	-21.75	82	0	0.0882041	0.2	-39.5824	-2.3	-9999	0
2016	1	2	6	30	2	-9999	-0.00395813	-22.8	81	0	0.0794225	0.2	-37.9029	-2.3	-9999	0
2016	1	2	7	0	2	-9999	-0.00385013	-23.15	80.5	0	0.0765179	0.2	-35.6783	-2.3	-9999	0
2016	1	2	7	30	2	1	-0.00344049	-23.5	80	0	0.0737092	0.2	-24.992	-2.29877	-9999	8.65
2016	1	2	8	0	2	1	-0.00414786	-22.3	80	0	0.0819875	0.2	-39.3391	-2.29754	-9999	17.3
2016	1	2	8	30	2	1	-0.00288947	-21.1	80	0	0.0910894	0.2	-38.8644	-2.28156	-9999	22.3
2016	1	2	9	0	2	1	0.0152475	-19.8	75.5	0	0.0962266	0.2	11.6641	-2.26557	-9999	27.3
2016	1	2	9	30	2	1	0.0130507	-18.5	71	0	0.101159	0.2	60.112	-2.27418	-9999	81.15
2016	1	2	10	0	2	1	0.00949984	-18	69	0	0.102579	0.2	49.2364	-2.28279	-9999	135
2016	1	2	10	30	2	1	0.0120122	-17.5	67	0	0.103912	0.2	63.7952	-2.28811	-9999	167.25
2016	1	2	11	0	2	1	0.0119962	-17.25	66.5	0	0.105335	0.2	60.442	-2.29344	-9999	199.5
2016	1	2	11	30	2	1	0.0143166	-17	66	0	0.106766	0.2	60.442	-2.29877	-9999	210.55
2016	1	2	12	0	2	1	0.0133844	-16.25	64.5	0	0.111108	0.2	71.3958	-2.3041	-9999	221.6
2016	1	2	12	30	2	1	0.0137249	-15.5	63	0	0.115515	0.2	75.1008	-2.32049	-9999	164.45
2016	1	2	13	0	2	1	0.0122178	-15.15	62	0	0.117026	0.2	74.0222	-2.33689	-9999	107.3
2016	1	2	13	30	2	1	0.0136988	-14.8	61	0	0.118515	0.2	82.6348	-2.34262	-9999	131.5
2016	1	2	14	0	2	1	0.0136988	-14.9	62	0	0.119468	0.2	82.6348	-2.34836	-9999	155.7
2016	1	2	14	30	2	1	0.0113016	-15	63	0	0.120397	0.2	61.1677	-2.34918	-9999	118.3
2016	1	2	15	0	2	1	0.00978643	-15.7	66	0	0.119023	0.2	27.2863	-2.35	-9999	80.9
2016	1	2	15	30	2	1	0.00651411	-16.4	69	0	0.117379	0.2	16.1039	-2.35	-9999	54.3389
2016	1	2	16	0	2	-9999	0.00361717	-17.3	71.5	0	0.112778	0.2	-1.02183	-2.35	-9999	27.7778
2016	1	2	16	30	2	-9999	0.000302093	-18.2	74	0	0.10816	0.2	-18.0827	-2.35	-9999	13.8889
2016	1	2	17	0	2	-9999	-0.00189996	-19.1	76	0	0.102871	0.2	-28.9895	-2.35	-9999	0
2016	1	2	17	30	2	-9999	-0.00351157	-20	78	0	0.0977116	0.2	-37.8716	-2.34426	-9999	0
2016	1	2	18	0	2	-9999	-0.00347117	-20.2	81	0	0.0997302	0.2	-37.3698	-2.33852	-9999	0
2016	1	2	18	30	2	-9999	-0.00349379	-20.4	84	0	0.101648	0.2	-39.7104	-2.32787	-9999	0
2016	1	2	19	0	2	-9999	-0.00370032	-20.55	83	0	0.0991391	0.2	-41.233	-2.31721	-9999	0
2016	1	2	19	30	2	-9999	-0.00369131	-20.7	82	0	0.0966766	0.2	-39.8928	-2.29836	-9999	0
2016	1	2	20	0	2	-9999	-0.00369131	-20.7	81.5	0	0.0960871	0.2	-39.8928	-2.27951	-9999	0
2016	1	2	20	30	2	-9999	-0.00369131	-20.7	81	0	0.0954976	0.2	-39.8928	-2.28525	-9999	0
2016	1	2	21	0	2	-9999	-0.00369131	-20.85	79.5	0	0.092514	0.2	-40.3851	-2.29098	-9999	0
2016	1	2	21	30	2	-9999	-0.0036365	-21	78	0	0.0895901	0.2	-39.0564	-2.3127	-9999	0
2016	1	2	22	0	2	-9999	-0.00372975	-21.35	79.5	0	0.0885648	0.2	-39.348	-2.33443	-9999	0
2016	1	2	22	30	2	-9999	-0.00375524	-21.7	81	0	0.0875116	0.2	-39.5824	-2.32213	-9999	0
2016	1	2	23	0	2	-9999	-0.00375524	-21.65	80	0	0.086811	0.2	-39.5824	-2.30984	-9999	0
2016	1	2	23	30	2	-9999	-0.00375524	-21.6	79	0	0.0861025	0.2	-39.5824	-2.32992	-9999	0
2016	1	3	0	0	3	-9999	-0.00414786	-22.45	78.5	0	0.079392	0.2	-39.3391	-2.35	-9999	0
2016	1	3	0	30	3	-9999	-0.00348751	-23.3	78	0	0.0731587	0.2	-30.9945	-2.3459	-9999	0
2016	1	3	1	0	3	-9999	-0.00332489	-23.8	78	0	0.0699665	0.2	-13.5145	-2.3418	-9999	0
2016	1	3	1	30	3	-9999	-0.00332489	-24.3	78	0	0.0668998	0.2	-22.5455	-2.34098	-9999	0
2016	1	3	2	0	3	-9999	-0.0044712	-25.2	77	0	0.0608913	0.2	-26.2901	-2.34016	-9999	0
2016	1	3	2	30	3	-9999	-0.0044712	-26.1	76	0	0.0553754	0.2	-26.2901	-2.34467	-9999	0
2016	1	3	3	0	3	-9999	-0.00332489	-24.75	78.5	0	0.0646552	0.2	-22.5455	-2.34918	-9999	0
2016	1	3	3	30	3	-9999	-0.00342213	-23.4	81	0	0.0752989	0.2	-29.516	-2.35984	-9999	0
2016	1	3	4	0	3	-9999	-0.00332489	-23.85	79	0	0.0705473	0.2	-13.5145	-2.37049	-9999	0
2016	1	3	4	30	3	-9999	-0.00332489	-24.3	77	0	0.0660421	0.2	-22.5455	-2.36803	-9999	0
2016	1	3	5	0	3	-9999	-0.0044712	-25.55	76.5	0	0.0586046	0.2	-26.2901	-2.36557	-9999	0
2016	1	3	5	30	3	-9999	-0.0044712	-26.8	76	0	0.0519339	0.2	-26.2901	-2.36967	-9999	0
2016	1	3	6	0	3	-9999	-0.0044712	-26.95	75.5	0	0.050885	0.2	-26.2901	-2.37377	-9999	0
2016	1	3	6	30	3	-9999	-0.0044712	-27.1	75	0	0.0498541	0.2	-26.2901	-2.37787	-9999	0
2016	1	3	7	0	3	-9999	-0.0044712	-27.3	76.5	0	0.049921	0.2	-26.2901	-2.38197	-9999	0
2016	1	3	7	30	3	1	-0.0044712	-27.5	78	0	0.049967	0.2	-26.2901	-2.36598	-9999	14.7
2016	1	3	8	0	3	1	-0.0044712	-26.05	79.5	0	0.0581907	0.2	-26.2901	-2.35	-9999	29.4
2016	1	3	8	30	3	1	-0.00332489	-24.6	81	0	0.0676227	0.2	-22.5455	-2.35	-9999	125.6
2016	1	3	9	0	3	1	0.0114307	-21.9	79.5	0	0.0843957	0.2	12.1392	-2.35	-9999	221.8
2016	1	3	9	30	3	1	0.0149532	-19.2	78	0	0.104677	0.2	57.2696	-2.35	-9999	264.65
2016	1	3	10	0	3	1	0.00949984	-18.4	75.5	0	0.10849	0.2	49.2364	-2.35	-9999	307.5
2016	1	3	10	30	3	1	0.0120122	-17.6	73	0	0.112265	0.2	63.7952	-2.35451	-9999	332.85
2016	1	3	11	0	3	1	0.0120969	-16.75	70.5	0	0.116465	0.2	60.9595	-2.35902	-9999	358.2
2016	1	3	11	30	3	1	0.0117145	-15.9	68	0	0.120606	0.2	71.3958	-2.37049	-9999	374.3
2016	1	3	12	0	3	1	0.0122178	-15.35	67.5	0	0.125315	0.2	74.0222	-2.38197	-9999	390.4
2016	1	3	12	30	3	1	0.0130161	-14.8	67	0	0.130172	0.2	81.8466	-2.39139	-9999	364
2016	1	3	13	0	3	1	0.0136988	-14.35	65	0	0.13105	0.2	83.525	-2.40082	-9999	337.6
2016	1	3	13	30	3	1	0.0146303	-13.9	63	0	0.13179	0.2	86.8709	-2.40615	-9999	261.45
2016	1	3	14	0	3	1	0.0142882	-14.05	63	0	0.130182	0.2	87.9761	-2.41148	-9999	185.3
2016	1	3	14	30	3	1	0.011148	-14.2	63	0	0.128591	0.2	65.8639	-2.41475	-9999	120.55
2016	1	3	15	0	3	1	0.00801348	-14.7	65.5	0	0.128311	0.2	26.4029	-2.41803	-9999	55.8
2016	1	3	15	30	3	1	0.0089993	-15.2	68	0	0.127821	0.2	27.3424	-2.42295	-9999	41.7889
2016	1	3	16	0	3	-9999	0.00849725	-15.15	70.5	0	0.13307	0.2	23.5377	-2.42787	-9999	27.7778
2016	1	3	16	30	3	-9999	0.00849725	-15.1	73	0	0.138359	0.2	23.5377	-2.4373	-9999	13.8889
2016	1	3	17	0	3	-9999	0.00848921	-14.85	73	0	0.141245	0.2	23.1526	-2.44672	-9999	0
2016	1	3	17	30	3	-9999	0.00859225	-14.6	73	0	0.144185	0.2	25.1148	-2.44754	-9999	0
2016	1	3	18	0	3	-9999	0.00849725	-15.15	72.5	0	0.136845	0.2	23.5377	-2.44836	-9999	0
2016	1	3	18	30	3	-9999	0.00737591	-15.7	72	0	0.129843	0.2	16.7114	-2.44918	-9999	0
2016	1	3	19	0	3	-9999	0.0059286	-16.35	73.5	0	0.125558	0.2	9.69116	-2.45	-9999	0
2016	1	3	19	30	3	-9999	0.00488941	-17	75	0	0.121325	0.2	4.56415	-2.45	-9999	0
2016	1	3	20	0	3	-9999	0.00309008	-17.45	75.5	0	0.11759	0.2	-5.60877	-2.45	-9999	0
2016	1	3	20	30	3	-9999	0.0012822	-17.9	76	0	0.113948	0.2	-13.1111	-2.45	-9999	0
2016	1	3	21	0	3	-9999	0.0003076	-18.25	77.5	0	0.112795	0.2	-22.8642	-2.45	-9999	0
2016	1	3	21	30	3	-9999	-0.000746769	-18.6	79	0	0.111601	0.2	-27.6091	-2.45	-9999	0
2016	1	3	22	0	3	-9999	-0.00123089	-18.85	79	0	0.109244	0.2	-30.6256	-2.45	-9999	0
2016	1	3	22	30	3	-9999	-0.0015891	-19.1	79	0	0.106931	0.2	-29.3003	-2.44918	-9999	0
2016	1	3	23	0	3	-9999	-0.00215313	-19.3	79	0	0.105113	0.2	-34.0276	-2.44836	-9999	0
2016	1	3	23	30	3	-9999	-0.00245011	-19.5	79	0	0.103322	0.2	-36.2748	-2.44918	-9999	0
2016	1	4	0	0	4	-9999	-0.00266525	-19.7	79.5	0	0.102202	0.2	-35.7142	-2.45	-9999	0
2016	1	4	0	30	4	-9999	-0.00299152	-19.9	80	0	0.101086	0.2	-37.6095	-2.45082	-9999	0
2016	1	4	1	0	4	-9999	-0.00296894	-20.25	79.5	0	0.0974607	0.2	-37.1507	-2.45164	-9999	0
2016	1	4	1	30	4	-9999	-0.00299575	-20.6	79	0	0.0939525	0.2	-38.9987	-2.45533	-9999	0
2016	1	4	2	0	4	-9999	-0.00290257	-21.1	79	0	0.0899508	0.2	-37.9876	-2.45902	-9999	0
2016	1	4	2	30	4	-9999	-0.00289563	-21.6	79	0	0.0861025	0.2	-38.5092	-2.47705	-9999	0
2016	1	4	3	0	4	-9999	-0.00326385	-22.3	79	0	0.0809626	0.2	-38.6721	-2.49508	-9999	0
2016	1	4	3	30	4	-9999	-0.00339058	-23	79	0	0.0760995	0.2	-35.9849	-2.49754	-9999	0
2016	1	4	4	0	4	-9999	-0.00322082	-23.1	78.5	0	0.0749492	0.2	-34.7032	-2.5	-9999	0
2016	1	4	4	30	4	-9999	-0.00301074	-23.2	78	0	0.0738126	0.2	-32.4641	-2.5	-9999	0
2016	1	4	5	0	4	-9999	-0.00146241	-23.7	78	0	0.0705948	0.2	-21.341	-2.5	-9999	0
2016	1	4	5	30	4	-9999	-0.00204271	-24.2	78	0	0.0675033	0.2	-23.4141	-2.5	-9999	0
2016	1	4	6	0	4	-9999	-0.00146241	-23.7	79	0	0.0714998	0.2	-21.341	-2.5	-9999	0
2016	1	4	6	30	4	-9999	-0.00301074	-23.2	80	0	0.0757053	0.2	-32.4641	-2.5	-9999	0
2016	1	4	7	0	4	-9999	-0.00289563	-21.6	79	0	0.0861025	0.2	-38.5092	-2.5	-9999	0
2016	1	4	7	30	4	1	-0.00299152	-20	78	0	0.0977116	0.2	-38.5313	-2.50779	-9999	9.5
2016	1	4	8	0	4	1	-0.00299152	-19.95	78	0	0.0981345	0.2	-37.6095	-2.51557	-9999	19
2016	1	4	8	30	4	1	-0.00299152	-19.9	78	0	0.098559	0.2	-37.6095	-2.50164	-9999	82.45
2016	1	4	9	0	4	1	-0.00266525	-19.7	77.5	0	0.0996306	0.2	-35.7142	-2.4877	-9999	145.9
2016	1	4	9	30	4	1	-0.00245011	-19.5	77	0	0.100707	0.2	-36.2748	-2.49139	-9999	149.95
2016	1	4	10	0	4	1	-0.00038461	-18.7	76	0	0.106451	0.2	-25.853	-2.49508	-9999	154
2016	1	4	10	30	4	1	0.00180032	-17.9	75	0	0.112448	0.2	-11.2271	-2.51189	-9999	175.25
2016	1	4	11	0	4	1	0.00238123	-17.75	73	0	0.110849	0.2	-10.1583	-2.52869	-9999	196.5
2016	1	4	11	30	4	1	0.0029037	-17.6	71	0	0.109189	0.2	-5.57659	-2.5291	-9999	209.3
2016	1	4	12	0	4	1	0.00423031	-17.25	69	0	0.109295	0.2	-0.202677	-2.52951	-9999	222.1
2016	1	4	12	30	4	1	0.00546115	-16.9	67	0	0.109298	0.2	7.45391	-2.53975	-9999	190.05
2016	1	4	13	0	4	1	0.00546115	-16.65	66.5	0	0.110783	0.2	7.45391	-2.55	-9999	158
2016	1	4	13	30	4	1	0.00623455	-16.4	66	0	0.112275	0.2	10.9835	-2.55	-9999	172.25
2016	1	4	14	0	4	1	0.00588196	-16.6	70	0	0.117103	0.2	9.67418	-2.55	-9999	186.5
2016	1	4	14	30	4	1	0.00490528	-16.8	74	0	0.121736	0.2	5.34956	-2.55451	-9999	114.55
2016	1	4	15	0	4	1	0.00409218	-17.15	73	0	0.116609	0.2	0.678377	-2.55902	-9999	42.6
2016	1	4	15	30	4	1	0.00277661	-17.5	72	0	0.111666	0.2	-6.54153	-2.55287	-9999	21.3
2016	1	4	16	0	4	-9999	0.00135101	-17.85	75.5	0	0.113679	0.2	-12.5366	-2.54672	-9999	0
2016	1	4	16	30	4	-9999	0.0004681	-18.2	79	0	0.115468	0.2	-18.9022	-2.53361	-9999	0
2016	1	4	17	0	4	-9999	0.000430469	-18.25	75.5	0	0.109884	0.2	-22.6841	-2.52049	-9999	0
2016	1	4	17	30	4	-9999	-0.000223877	-18.3	72	0	0.104345	0.2	-23.3652	-2.51107	-9999	0
2016	1	4	18	0	4	-9999	-0.00105448	-18.85	73	0	0.100947	0.2	-30.242	-2.50164	-9999	0
2016	1	4	18	30	4	-9999	-0.00213936	-19.4	74	0	0.0976184	0.2	-33.7254	-2.50123	-9999	0
2016	1	4	19	0	4	-9999	-0.002837	-19.9	74.5	0	0.0941365	0.2	-36.9492	-2.50082	-9999	0
2016	1	4	19	30	4	-9999	-0.00282539	-20.4	75	0	0.0907569	0.2	-38.4684	-2.5	-9999	0
2016	1	4	20	0	4	-9999	-0.00293489	-20.6	75.5	0	0.08979	0.2	-38.4874	-2.49918	-9999	0
2016	1	4	20	30	4	-9999	-0.00293489	-20.8	76	0	0.0888267	0.2	-38.8692	-2.48443	-9999	0
2016	1	4	21	0	4	-9999	-0.00283883	-21.1	76	0	0.086535	0.2	-37.444	-2.46967	-9999	0
2016	1	4	21	30	4	-9999	-0.00282046	-21.4	76	0	0.0842963	0.2	-37.5004	-2.45984	-9999	0
2016	1	4	22	0	4	-9999	-0.00274696	-21.4	76	0	0.0842963	0.2	-37.3621	-2.45	-9999	0
2016	1	4	22	30	4	-9999	-0.00274696	-21.4	76	0	0.0842963	0.2	-37.3621	-2.45	-9999	0
2016	1	4	23	0	4	-9999	-0.00274911	-21.65	76.5	0	0.0830131	0.2	-37.7355	-2.45	-9999	0
2016	1	4	23	30	4	-9999	-0.00306083	-21.9	77	0	0.0817418	0.2	-38.3548	-2.45	-9999	0
2016	1	5	0	0	5	-9999	-0.00325855	-22.2	77.5	0	0.0801288	0.2	-39.4512	-2.45	-9999	0
2016	1	5	0	30	5	-9999	-0.00312446	-22.5	78	0	0.0785386	0.2	-38.3992	-2.45	-9999	0
2016	1	5	1	0	5	-9999	-0.00307042	-22.55	77.5	0	0.077691	0.2	-38.9702	-2.45	-9999	0
2016	1	5	1	30	5	-9999	-0.00279027	-22.6	77	0	0.0768492	0.2	-37.1351	-2.45	-9999	0
2016	1	5	2	0	5	-9999	-0.00321714	-22.9	76	0	0.0738622	0.2	-35.822	-2.45	-9999	0
2016	1	5	2	30	5	-9999	-0.00283966	-23.2	75	0	0.0709737	0.2	-32.5143	-2.45451	-9999	0
2016	1	5	3	0	5	-9999	-0.00204271	-24.05	77	0	0.0675406	0.2	-23.4141	-2.45902	-9999	0
2016	1	5	3	30	5	-9999	-0.00204271	-24.9	79	0	0.0641918	0.2	-23.4141	-2.47254	-9999	0
2016	1	5	4	0	5	-9999	-0.0044712	-25.5	77.5	0	0.0596411	0.2	-26.2901	-2.48607	-9999	0
2016	1	5	4	30	5	-9999	-0.0044712	-26.1	76	0	0.0553754	0.2	-26.2901	-2.49303	-9999	0
2016	1	5	5	0	5	-9999	-0.0044712	-26.3	76.5	0	0.0547295	0.2	-26.2901	-2.5	-9999	0
2016	1	5	5	30	5	-9999	-0.0044712	-26.5	77	0	0.054087	0.2	-26.2901	-2.5	-9999	0
2016	1	5	6	0	5	-9999	-0.0044712	-27.55	76	0	0.048461	0.2	-26.2901	-2.5	-9999	0
2016	1	5	6	30	5	-9999	-0.00965371	-28.6	75	0	0.043371	0.2	117.212	-2.5	-9999	0
2016	1	5	7	0	5	-9999	-0.00965371	-28.85	75.5	0	0.04265	0.2	117.212	-2.5	-9999	0
2016	1	5	7	30	5	1	0.00277964	-29.1	76	0	0.0419367	0.2	205.481	-2.5	-9999	33.5
2016	1	5	8	0	5	1	-0.0044712	-26.85	77.5	0	0.0527159	0.2	-26.2901	-2.5	-9999	67
2016	1	5	8	30	5	1	-0.000821146	-24.6	79	0	0.065953	0.2	-13.3923	-2.49672	-9999	149.8
2016	1	5	9	0	5	1	-0.00160118	-21.45	73	0	0.0806153	0.2	4.54738	-2.49344	-9999	232.6
2016	1	5	9	30	5	1	0.00112251	-18.3	67	0	0.0970991	0.2	-25.1249	-2.49959	-9999	262
2016	1	5	10	0	5	1	0.0026708	-17.9	65.5	0	0.0982049	0.2	-1.65573	-2.50574	-9999	291.4
2016	1	5	10	30	5	1	0.0235616	-17.5	64	0	0.099259	0.2	92.3926	-2.5041	0.0235616	209.6
2016	1	5	11	0	5	1	0.0188201	-16.95	61.5	0	0.0999055	0.2	86.0124	-2.50246	0.0188201	127.8
2016	1	5	11	30	5	1	0.0109737	-16.4	59	0	0.100367	0.2	34.5577	-2.50082	0.0109737	150.95
2016	1	5	12	0	5	1	0.00425088	-15.95	58	0	0.102442	0.2	39.6085	-2.49918	0.00425088	174.1
2016	1	5	12	30	5	1	0.009577	-15.5	57	0	0.104514	0.2	57.1004	-2.49959	0.009577	125.45
2016	1	5	13	0	5	1	0.0070632	-15.2	56	0	0.105264	0.2	27.8212	-2.5	0.0070632	76.8
2016	1	5	13	30	5	1	0.00848389	-14.9	55	0	0.10598	0.2	34.046	-2.48279	0.00848389	61.5
2016	1	5	14	0	5	1	0.00684936	-15.15	60	0	0.113251	0.2	22.9994	-2.46557	0.00684936	46.2
2016	1	5	14	30	5	1	0.00541145	-15.4	65	0	0.120175	0.2	6.4828	-2.45779	0.00541145	27.85
2016	1	5	15	0	5	1	0.00838842	-15.5	66	0	0.121016	0.2	-21.9768	-2.45	-9999	9.5
2016	1	5	15	30	5	1	0.00788513	-15.6	67	0	0.121834	0.2	-14.1669	-2.42787	-9999	4.75
2016	1	5	16	0	5	-9999	0.00744301	-15.5	63	0	0.115515	0.2	-6.35707	-2.40574	-9999	0
2016	1	5	16	30	5	-9999	0.00331523	-15.4	59	0	0.109082	0.2	-8.98652	-2.39713	0.00331523	0
2016	1	5	17	0	5	-9999	0.00096552	-15.7	59.5	0	0.107301	0.2	-11.6671	-2.38852	0.00096552	0
2016	1	5	17	30	5	-9999	0.00073548	-16	60	0	0.105534	0.2	-20.464	-2.36926	-9999	0
2016	1	5	18	0	5	-9999	0.00050544	-16.3	61.5	0	0.105498	0.2	-15.0808	-2.35	0.00050544	0
2016	1	5	18	30	5	-9999	0.00040176	-16.6	63	0	0.105393	0.2	-32.9821	-2.35	0.00040176	0
2016	1	5	19	0	5	-9999	0.00126166	-16.75	64	0	0.105727	0.2	-33.6681	-2.35	0.00126166	0
2016	1	5	19	30	5	-9999	0.00141199	-16.9	65	0	0.106036	0.2	-18.7967	-2.33811	0.00141199	0
2016	1	5	20	0	5	-9999	0.00300672	-16.85	66.5	0	0.108939	0.2	-20.2355	-2.32623	0.00300672	0
2016	1	5	20	30	5	-9999	0.00192521	-16.8	68	0	0.111865	0.2	-29.6427	-2.31393	-9999	0
2016	1	5	21	0	5	-9999	0.000843696	-16.75	71.5	0	0.118117	0.2	-28.3319	-2.30164	0.000843696	0
2016	1	5	21	30	5	-9999	0.00428316	-16.7	75	0	0.12442	0.2	-22.7349	-2.29877	-9999	0
2016	1	5	22	0	5	-9999	0.00428316	-16.7	76.5	0	0.126908	0.2	-13.5495	-2.2959	-9999	0
2016	1	5	22	30	5	-9999	0.00428316	-16.7	78	0	0.129397	0.2	-0.209983	-2.29836	-9999	0
2016	1	5	23	0	5	-9999	0.00428316	-16.65	79	0	0.131606	0.2	-0.209983	-2.30082	-9999	0
2016	1	5	23	30	5	-9999	0.00462668	-16.6	80	0.1	0.133832	0.2	1.72835	-2.30615	-9999	0
2016	1	6	0	0	6	-9999	0.00462668	-16.6	79.5	0	0.132995	0.2	1.72835	-2.31148	-9999	0
2016	1	6	0	30	6	-9999	0.00462668	-16.6	79	0	0.132159	0.2	1.72835	-2.31189	-9999	0
2016	1	6	1	0	6	-9999	0.00462668	-16.6	76.5	0	0.127977	0.2	1.72835	-2.3123	-9999	0
2016	1	6	1	30	6	-9999	0.00462668	-16.6	74	0	0.123794	0.2	1.72835	-2.30615	-9999	0
2016	1	6	2	0	6	-9999	0.00428316	-16.75	75	0	0.123899	0.2	-0.209983	-2.3	-9999	0
2016	1	6	2	30	6	-9999	0.0042296	-16.9	76	0	0.12398	0.2	-0.445414	-2.3209	-9999	0
2016	1	6	3	0	6	-9999	0.00411028	-17.05	77	0	0.124038	0.2	-1.61549	-2.3418	-9999	0
2016	1	6	3	30	6	-9999	0.00365403	-17.2	78	0	0.124072	0.2	-5.19132	-2.3459	-9999	0
2016	1	6	4	0	6	-9999	0.00281994	-17.45	77.5	0	0.120705	0.2	-10.0576	-2.35	-9999	0
2016	1	6	4	30	6	-9999	0.00198997	-17.7	77	0	0.117419	0.2	-15.2585	-2.36803	-9999	0
2016	1	6	5	0	6	-9999	0.00084599	-18.25	77.5	0	0.112795	0.2	-22.9597	-2.38607	-9999	0
2016	1	6	5	30	6	-9999	-0.000460061	-18.8	78	0	0.108323	0.2	-29.1983	-2.39303	-9999	0
2016	1	6	6	0	6	-9999	-0.00143772	-19.7	79	0	0.101559	0.2	-32.1296	-2.4	-9999	0
2016	1	6	6	30	6	-9999	-0.0017488	-20.6	80	0	0.0951417	0.2	-33.9521	-2.4	-9999	0
2016	1	6	7	0	6	-9999	-0.0017488	-20.75	80	0	0.0939094	0.2	-33.9521	-2.4	-9999	0
2016	1	6	7	30	6	1	-0.00183939	-20.9	80	0	0.0926914	0.2	-33.0857	-2.41721	-9999	26.05
2016	1	6	8	0	6	1	-0.00177971	-20.15	78.5	0	0.0970712	0.2	-32.1033	-2.43443	-9999	52.1
2016	1	6	8	30	6	1	-0.000268245	-19.4	77	0	0.101576	0.2	-24.7364	-2.43402	-9999	157.05
2016	1	6	9	0	6	1	0.00859513	-18.4	73.5	0	0.105617	0.2	26.5183	-2.43361	-9999	262
2016	1	6	9	30	6	1	0.0105827	-17.4	70	0	0.109485	0.2	54.2642	-2.43893	-9999	309.95
2016	1	6	10	0	6	1	0.0124998	-16.75	68	0	0.112335	0.2	62.5122	-2.44426	0.0124998	357.9
2016	1	6	10	30	6	1	0.0155333	-16.1	66	0	0.115124	0.2	97.0359	-2.44713	0.0155333	377
2016	1	6	11	0	6	1	0.0149808	-15.35	64	0	0.118817	0.2	107.472	-2.45	0.0149808	396.1
2016	1	6	11	30	6	1	0.0113003	-14.6	62	0	0.122459	0.2	87.1988	-2.44918	-9999	401.35
2016	1	6	12	0	6	1	0.0114304	-14.05	59.5	0	0.122949	0.2	88.9262	-2.44836	-9999	406.6
2016	1	6	12	30	6	1	0.0118445	-13.5	57	0	0.123197	0.2	88.8898	-2.44918	-9999	344.9
2016	1	6	13	0	6	1	0.0114711	-13.05	54	0	0.121065	0.2	85.2559	-2.45	0.0114711	283.2
2016	1	6	13	30	6	1	0.0158264	-12.6	51	0	0.118585	0.2	109.691	-2.45	0.0158264	235.5
2016	1	6	14	0	6	1	0.0217243	-12.6	50.5	0	0.117423	0.2	109.851	-2.45	0.0217243	187.8
2016	1	6	14	30	6	1	0.00972637	-12.6	50	0	0.11626	0.2	52.9578	-2.4709	-9999	122.35
2016	1	6	15	0	6	1	0.00770791	-13.7	54.5	0	0.115888	0.2	36.0909	-2.4918	-9999	56.9
2016	1	6	15	30	6	1	0.00776787	-14.8	59	0	0.114629	0.2	22.8817	-2.49672	-9999	42.3389
2016	1	6	16	0	6	-9999	0.00605452	-15.85	62.5	0	0.111313	0.2	8.03449	-2.50164	-9999	27.7778
2016	1	6	16	30	6	-9999	0.00405007	-16.9	66	0	0.107667	0.2	-1.15711	-2.50082	-9999	13.8889
2016	1	6	17	0	6	-9999	0.00406748	-16.8	66	0	0.108575	0.2	-1.34231	-2.5	-9999	0
2016	1	6	17	30	6	-9999	0.00402938	-16.7	66	0	0.10949	0.2	-1.61727	-2.5	-9999	0
2016	1	6	18	0	6	-9999	0.00398531	-16.85	66.5	0	0.108939	0.2	-1.81816	-2.5	-9999	0
2016	1	6	18	30	6	-9999	0.00397434	-17	67	0	0.108384	0.2	-2.43032	-2.49959	-9999	0
2016	1	6	19	0	6	-9999	0.00278014	-17.4	68.5	0	0.107139	0.2	-9.36513	-2.49918	-9999	0
2016	1	6	19	30	6	-9999	-0.00274752	-17.8	70	0	0.105845	0.2	-33.3222	-2.49959	-0.00274752	0
2016	1	6	20	0	6	-9999	-0.00496368	-18.1	71.5	0	0.105397	0.2	-57.2882	-2.5	-0.00496368	0
2016	1	6	20	30	6	-9999	-0.00513281	-18.4	73	0	0.104898	0.2	-58.6783	-2.49426	-0.00513281	0
2016	1	6	21	0	6	-9999	-0.00418867	-18.9	75	0	0.10327	0.2	-46.9092	-2.48852	-0.00418867	0
2016	1	6	21	30	6	-9999	-0.00180144	-19.4	77	0	0.101576	0.2	-35.1941	-2.49057	-0.00180144	0
2016	1	6	22	0	6	-9999	-0.00173748	-19.55	77	0	0.100274	0.2	-29.2799	-2.49262	-0.00173748	0
2016	1	6	22	30	6	-9999	-0.00467856	-19.7	77	0	0.0989878	0.2	-55.9753	-2.49467	-0.00467856	0
2016	1	6	23	0	6	-9999	-0.00205546	-19.6	76.5	0	0.0991956	0.2	-34.3868	-2.49672	-0.00205546	0
2016	1	6	23	30	6	-9999	-0.00160121	-19.5	76	0	0.0993987	0.2	-24.636	-2.47131	-0.00160121	0
2016	1	7	0	0	7	-9999	-0.00478224	-19.7	75.5	0	0.0970595	0.2	-58.4889	-2.4459	-0.00478224	0
2016	1	7	0	30	7	-9999	-0.00512352	-19.9	75	0	0.0947682	0.2	-59.1561	-2.45697	-9999	0
2016	1	7	1	0	7	-9999	-0.0054648	-19.85	75	0	0.095178	0.2	-59.8232	-2.46803	-9999	0
2016	1	7	1	30	7	-9999	-0.00580608	-19.8	75	0	0.0955893	0.2	-60.4903	-2.48402	-0.00580608	0
2016	1	7	2	0	7	-9999	-0.00755272	-20.1	75	0	0.093145	0.2	-70.1668	-2.5	-0.00755272	0
2016	1	7	2	30	7	-9999	-0.00665996	-20.4	75	0	0.0907569	0.2	-62.6882	-2.49385	-9999	0
2016	1	7	3	0	7	-9999	-0.0057672	-20.55	76	0	0.0907779	0.2	-55.2096	-2.4877	-0.0057672	0
2016	1	7	3	30	7	-9999	-0.00595188	-20.7	77	0	0.0907816	0.2	-66.0507	-2.4877	-0.00595188	0
2016	1	7	4	0	7	-9999	-0.00537451	-20.8	77	0	0.0899955	0.2	-56.8278	-2.4877	-0.00537451	0
2016	1	7	4	30	7	-9999	-0.00407592	-20.9	77	0	0.0892155	0.2	-45.7795	-2.49959	-0.00407592	0
2016	1	7	5	0	7	-9999	-0.00710208	-21.1	77	0	0.0876736	0.2	-58.8651	-2.51148	-0.00710208	0
2016	1	7	5	30	7	-9999	-0.00177228	-21.3	77	0	0.0861556	0.2	-30.7718	-2.4918	-0.00177228	0
2016	1	7	6	0	7	-9999	-0.00167832	-21.15	76.5	0	0.086725	0.2	-19.7714	-2.47213	-0.00167832	0
2016	1	7	6	30	7	-9999	-0.00523066	-21	76	0	0.0872929	0.2	-48.6927	-2.50615	-0.00523066	0
2016	1	7	7	0	7	-9999	-0.0022356	-21	76	0	0.0872929	0.2	-26.163	-2.54016	-0.0022356	0
2016	1	7	7	30	7	1	-0.00517882	-21	76	0	0.0872929	0.2	-52.8265	-2.53934	-0.00517882	49.75
2016	1	7	8	0	7	1	-0.00512523	-20.05	74	0	0.0923012	0.2	-44.3833	-2.53852	-0.00512523	99.5
2016	1	7	8	30	7	1	-0.00268466	-19.1	72	0	0.0974566	0.2	-26.1624	-2.52623	-0.00268466	100.45
2016	1	7	9	0	7	1	-0.00291989	-18.55	70.5	0	0.100019	0.2	-44.2403	-2.51393	-0.00291989	101.4
2016	1	7	9	30	7	1	0.00290887	-18	69	0	0.102579	0.2	-0.227192	-2.50943	0.00290887	129.55
2016	1	7	10	0	7	1	0.00875448	-17.35	67	0	0.105236	0.2	40.0942	-2.50492	0.00875448	157.7
2016	1	7	10	30	7	1	0.0156884	-16.7	65	0	0.107831	0.2	169.584	-2.51762	0.0156884	180.1
2016	1	7	11	0	7	1	0.0132935	-16.25	64	0	0.110246	0.2	92.2045	-2.53033	0.0132935	202.5
2016	1	7	11	30	7	1	0.00531554	-15.8	63	0	0.112672	0.2	107.254	-2.52541	0.00531554	222.85
2016	1	7	12	0	7	1	0.0109676	-15.2	61	0	0.114663	0.2	122.304	-2.52049	0.0109676	243.2
2016	1	7	12	30	7	1	0.0109341	-14.6	59	0	0.116533	0.2	93.508	-2.51885	0.0109341	227.8
2016	1	7	13	0	7	1	0.0141476	-14.15	58.5	0	0.119897	0.2	95.9523	-2.51721	0.0141476	212.4
2016	1	7	13	30	7	1	0.014044	-13.7	58	0	0.12333	0.2	99.2779	-2.52008	0.014044	136.7
2016	1	7	14	0	7	1	0.0177654	-13.6	58	0	0.124341	0.2	41.4991	-2.52295	0.0177654	61
2016	1	7	14	30	7	1	0.00995809	-13.5	58	0	0.125359	0.2	20.2258	-2.51926	0.00995809	47.7
2016	1	7	15	0	7	1	0.00991513	-13.95	59.5	0	0.12396	0.2	25.1013	-2.51557	0.00991513	34.4
2016	1	7	15	30	7	1	0.000648	-14.4	61	0	0.122481	0.2	-5.67525	-2.50861	0.000648	17.2
2016	1	7	16	0	7	-9999	-0.00068688	-15.15	62	0	0.117026	0.2	-26.1378	-2.50164	-9999	0
2016	1	7	16	30	7	-9999	-0.00202176	-15.9	63	0	0.111738	0.2	-46.6003	-2.48975	-9999	0
2016	1	7	17	0	7	-9999	-0.00335664	-16.4	66	0	0.112275	0.2	-67.0628	-2.47787	-0.00335664	0
2016	1	7	17	30	7	-9999	0.00011016	-16.9	69	0	0.112561	0.2	-35.2343	-2.46393	0.00011016	0
2016	1	7	18	0	7	-9999	0.00347508	-17.2	69	0	0.109756	0.2	-6.23868	-2.45	-9999	0
2016	1	7	18	30	7	-9999	0.00245958	-17.5	69	0	0.107014	0.2	-11.4299	-2.45	-9999	0
2016	1	7	19	0	7	-9999	0.00195443	-17.75	70	0	0.106294	0.2	-15.5507	-2.45	-9999	0
2016	1	7	19	30	7	-9999	0.00138007	-18	71	0	0.105552	0.2	-28.9485	-2.45	-9999	0
2016	1	7	20	0	7	-9999	0.000871611	-18.25	71	0	0.103335	0.2	-23.1979	-2.45	-9999	0
2016	1	7	20	30	7	-9999	0.000281365	-18.5	71	0	0.101159	0.2	-23.5644	-2.43811	-9999	0
2016	1	7	21	0	7	-9999	-0.000402889	-18.85	72.5	0	0.100256	0.2	-28.3289	-2.42623	-9999	0
2016	1	7	21	30	7	-9999	-0.000878468	-19.2	74	0	0.0993087	0.2	-30.4897	-2.41311	-9999	0
2016	1	7	22	0	7	-9999	-0.00105547	-19.4	74.5	0	0.098278	0.2	-29.9153	-2.4	-9999	0
2016	1	7	22	30	7	-9999	-0.00168998	-19.6	75	0	0.0972505	0.2	-22.0999	-2.4	-0.00168998	0
2016	1	7	23	0	7	-9999	-0.0020425	-20.05	76.5	0	0.0954195	0.2	-22.1385	-2.4	-0.0020425	0
2016	1	7	23	30	7	-9999	-0.00208786	-20.5	78	0	0.093572	0.2	-21.0259	-2.3791	-9999	0
2016	1	8	0	0	8	-9999	-0.00213322	-21.55	78.5	0	0.0859332	0.2	-19.9134	-2.3582	-9999	0
2016	1	8	0	30	8	-9999	-0.00217858	-22.6	79	0	0.0788453	0.2	-18.8009	-2.3541	-0.00217858	0
2016	1	8	1	0	8	-9999	-0.000755661	-23.7	78	0	0.0705948	0.2	-21.0313	-2.35	-9999	0
2016	1	8	1	30	8	-9999	-0.000821146	-24.8	77	0	0.0631343	0.2	-21.913	-2.33566	-9999	0
2016	1	8	2	0	8	-9999	-0.000821146	-25.05	76.5	0	0.0613231	0.2	-21.913	-2.32131	-9999	0
2016	1	8	2	30	8	-9999	-0.00281848	-25.3	76	0	0.0595582	0.2	-29.5231	-2.31434	-9999	0
2016	1	8	3	0	8	-9999	-0.0044712	-25.3	77	0	0.0603419	0.2	-26.2901	-2.30738	-0.0044712	0
2016	1	8	3	30	8	-9999	-0.00281848	-25.3	78	0	0.0611255	0.2	-29.5231	-2.2873	-9999	0
2016	1	8	4	0	8	-9999	-0.00281848	-25.95	77	0	0.0568776	0.2	-29.5231	-2.26721	-9999	0
2016	1	8	4	30	8	-9999	-0.0044712	-26.6	76	0	0.052897	0.2	-45.4033	-2.2709	-9999	0
2016	1	8	5	0	8	-9999	-0.0044712	-27.05	75.5	0	0.0504183	0.2	-45.4033	-2.27459	-9999	0
2016	1	8	5	30	8	-9999	-0.0044712	-27.5	75	0	0.0480452	0.2	-26.2901	-2.2623	-9999	0
2016	1	8	6	0	8	-9999	-0.0044712	-27.7	75.5	0	0.0474775	0.2	-26.2901	-2.25	-9999	0
2016	1	8	6	30	8	-9999	-0.00805993	-27.9	76	0	0.0469129	0.2	93.5241	-2.25	-9999	0
2016	1	8	7	0	8	-9999	-0.0044712	-27.75	77	0	0.0481967	0.2	-26.2901	-2.25	-9999	0
2016	1	8	7	30	8	1	-0.0044712	-27.6	78	0	0.0495064	0.2	-26.2901	-2.25041	-9999	61
2016	1	8	8	0	8	1	-0.0044712	-26.4	77.5	0	0.0549395	0.2	-45.4033	-2.25082	-9999	122
2016	1	8	8	30	8	1	0.00027203	-25.2	77	0	0.0608913	0.2	-14.7947	-2.25123	-9999	179.05
2016	1	8	9	0	8	1	0.0172497	-22.05	74	0	0.0775275	0.2	19.8545	-2.25164	0.0172497	236.1
2016	1	8	9	30	8	1	0.00493128	-18.9	71	0	0.0977625	0.2	55.6928	-2.23893	0.00493128	269.4
2016	1	8	10	0	8	1	0.00498312	-17.5	67	0	0.103912	0.2	-11.839	-2.22623	-9999	302.7
2016	1	8	10	30	8	1	0.00503496	-16.1	63	0	0.109891	0.2	-17.5104	-2.22377	0.00503496	339.1
2016	1	8	11	0	8	1	0.0124357	-15	60	0	0.114664	0.2	-23.1818	-2.22131	0.0124357	375.5
2016	1	8	11	30	8	1	0.0105878	-13.9	57	0	0.119239	0.2	104.257	-2.22582	0.0105878	349.85
2016	1	8	12	0	8	1	0.0173409	-13.4	55	0	0.119847	0.2	79.7656	-2.23033	0.0173409	324.2
2016	1	8	12	30	8	1	0.0103574	-12.9	53	0	0.120278	0.2	67.5506	-2.23074	0.0103574	222.9
2016	1	8	13	0	8	1	0.0165925	-12.45	51.5	0	0.121208	0.2	108.773	-2.23115	0.0165925	121.6
2016	1	8	13	30	8	1	0.0201353	-12	50	0	0.122025	0.2	93.3172	-2.24057	-9999	118.45
2016	1	8	14	0	8	1	0.0236781	-11.9	51	0	0.12547	0.2	102.663	-2.25	0.0236781	115.3
2016	1	8	14	30	8	1	0.0101832	-11.8	52	0	0.128962	0.2	101.238	-2.225	0.0101832	88.15
2016	1	8	15	0	8	1	0.005832	-13.1	54	0	0.120575	0.2	14.6083	-2.2	0.005832	61
2016	1	8	15	30	8	1	0.00287323	-14.4	56	0	0.112442	0.2	-10.8283	-2.18893	0.00287323	44.3889
2016	1	8	16	0	8	-9999	0.00616057	-15.55	61	0	0.111385	0.2	9.80716	-2.17787	-9999	27.7778
2016	1	8	16	30	8	-9999	0.00399312	-16.7	66	0	0.10949	0.2	-1.61727	-2.16844	-9999	13.8889
2016	1	8	17	0	8	-9999	0.00345107	-17.2	67	0	0.106575	0.2	-6.23868	-2.15902	-9999	0
2016	1	8	17	30	8	-9999	0.0019557	-17.7	68	0	0.103695	0.2	-15.7192	-2.16025	-9999	0
2016	1	8	18	0	8	-9999	0.000911566	-18.25	68	0	0.0989683	0.2	-23.41	-2.16148	-9999	0
2016	1	8	18	30	8	-9999	-0.000319746	-18.8	68	0	0.0944356	0.2	-28.3766	-2.1623	-9999	0
2016	1	8	19	0	8	-9999	0.000360248	-18.45	68	0	0.097298	0.2	-23.8076	-2.16311	-9999	0
2016	1	8	19	30	8	-9999	-0.00269827	-18.1	68	0	0.100238	0.2	-66.7234	-2.16066	-0.00269827	0
2016	1	8	20	0	8	-9999	-0.00372989	-18.45	69.5	0	0.0994443	0.2	-59.2959	-2.1582	-0.00372989	0
2016	1	8	20	30	8	-9999	-0.00287582	-18.8	71	0	0.0986019	0.2	-42.7923	-2.1541	-9999	0
2016	1	8	21	0	8	-9999	-0.00202176	-18.85	72.5	0	0.100256	0.2	-26.2887	-2.15	-0.00202176	0
2016	1	8	21	30	8	-9999	-0.000281981	-18.9	74	0	0.101893	0.2	-27.917	-2.15	-9999	0
2016	1	8	22	0	8	-9999	-0.000889394	-19.35	75	0	0.0993634	0.2	-29.9417	-2.15	-9999	0
2016	1	8	22	30	8	-9999	-0.00127573	-19.8	76	0	0.0968638	0.2	-30.9508	-2.15902	-9999	0
2016	1	8	23	0	8	-9999	-0.000951685	-20.95	77	0	0.0888278	0.2	-17.526	-2.16803	-0.000951685	0
2016	1	8	23	30	8	-9999	-0.00191587	-22.1	78	0	0.0813593	0.2	-31.6106	-2.1832	-9999	0
2016	1	9	0	0	9	-9999	-0.00268096	-22.85	79	0	0.077119	0.2	-29.9819	-2.19836	-9999	0
2016	1	9	0	30	9	-9999	-0.00111352	-23.6	80	0	0.0730545	0.2	-19.7705	-2.19918	-9999	0
2016	1	9	1	0	9	-9999	-0.000967356	-24	79.5	0	0.0700466	0.2	-22.2323	-2.2	-9999	0
2016	1	9	1	30	9	-9999	-0.000967356	-24.4	79	0	0.0671511	0.2	-22.2323	-2.22049	-9999	0
2016	1	9	2	0	9	-9999	-0.000967356	-24.7	78	0	0.0645338	0.2	-22.2323	-2.24098	-9999	0
2016	1	9	2	30	9	-9999	-0.000967356	-25	77	0	0.0620037	0.2	-22.2323	-2.24795	-9999	0
2016	1	9	3	0	9	-9999	-0.000967356	-24.5	76.5	0	0.0644436	0.2	-22.2323	-2.25492	-9999	0
2016	1	9	3	30	9	-9999	-0.000967356	-24	76	0	0.0669628	0.2	-22.2323	-2.27746	-9999	0
2016	1	9	4	0	9	-9999	-0.00165794	-23.55	76	0	0.0697121	0.2	-22.563	-2.3	-9999	0
2016	1	9	4	30	9	-9999	-0.00251853	-23.1	76	0	0.0725622	0.2	-28.885	-2.30082	-9999	0
2016	1	9	5	0	9	-9999	-0.00177995	-22.55	77	0	0.0771898	0.2	-31.0513	-2.30164	-9999	0
2016	1	9	5	30	9	-9999	-0.00190852	-22	78	0	0.0820785	0.2	-31.3721	-2.32459	-9999	0
2016	1	9	6	0	9	-9999	-0.00172744	-22.3	77	0	0.0789129	0.2	-30.7659	-2.34754	-9999	0
2016	1	9	6	30	9	-9999	-0.00185127	-22.6	76	0	0.0758512	0.2	-29.7988	-2.35656	-9999	0
2016	1	9	7	0	9	-9999	-0.00186808	-22.25	77.5	0	0.0797764	0.2	-31.6948	-2.36557	-9999	0
2016	1	9	7	30	9	1	-0.00173286	-21.9	79	0.1	0.083865	0.2	-31.0831	-2.38279	-9999	9.95
2016	1	9	8	0	9	1	-0.00157553	-20.85	79	0	0.0919321	0.2	-32.1288	-2.4	-9999	19.9
2016	1	9	8	30	9	1	-0.00120521	-19.8	79	0.2	0.100687	0.2	-29.5991	-2.40082	-9999	43.3
2016	1	9	9	0	9	1	-3.5212e-05	-18.85	79	0	0.109244	0.2	-24.9557	-2.40164	-9999	66.7
2016	1	9	9	30	9	1	0.00179614	-17.9	79	0	0.118446	0.2	4.79095	-2.4082	-9999	80.1
2016	1	9	10	0	9	1	0.00453678	-17	76	0	0.122943	0.2	32.5386	-2.41475	-9999	93.5
2016	1	9	10	30	9	1	0.00522007	-16.1	73	0	0.127334	0.2	113.599	-2.43156	-9999	117.8
2016	1	9	11	0	9	1	0.00609119	-15.75	71	0	0.127508	0.2	132.857	-2.44836	-9999	142.1
2016	1	9	11	30	9	1	0.0066714	-15.4	69	0	0.12757	0.2	190.902	-2.45041	-9999	135.55
2016	1	9	12	0	9	1	0.00715723	-15.15	69	0	0.130238	0.2	29.9529	-2.45246	-9999	129
2016	1	9	12	30	9	1	0.00721809	-14.9	69	0	0.132956	0.2	88.3565	-2.47418	0.00721809	120.2
2016	1	9	13	0	9	1	0.0155111	-14.8	67.5	0	0.131143	0.2	26.8478	-2.4959	0.0155111	111.4
2016	1	9	13	30	9	1	0.0169627	-14.7	66	0	0.12929	0.2	61.9214	-2.51393	-9999	100.75
2016	1	9	14	0	9	1	0.0184142	-15	68.5	0	0.130908	0.2	35.2217	-2.53197	0.0184142	90.1
2016	1	9	14	30	9	1	0.027338	-15.3	71	0	0.13236	0.2	11.2411	-2.54057	0.027338	61.05
2016	1	9	15	0	9	1	0.020137	-15.55	72.5	0	0.132384	0.2	-3.28207	-2.54918	0.020137	32
2016	1	9	15	30	9	1	0.0167991	-15.8	74	0	0.132345	0.2	-25.624	-2.54508	0.0167991	16
2016	1	9	16	0	9	-9999	0.0146652	-16.45	70.5	0	0.11943	0.2	-25.575	-2.54098	0.0146652	0
2016	1	9	16	30	9	-9999	0.00529474	-17.1	67	0	0.107476	0.2	-59.2596	-2.52664	0.00529474	0
2016	1	9	17	0	9	-9999	0.00139191	-18	66.5	0	0.0988623	0.2	-20.6347	-2.5123	-9999	0
2016	1	9	17	30	9	-9999	-0.000284122	-18.9	66	0	0.0908779	0.2	-28.718	-2.50615	-9999	0
2016	1	9	18	0	9	-9999	-0.000792143	-19.3	65	0	0.0864854	0.2	-30.9354	-2.5	-9999	0
2016	1	9	18	30	9	-9999	-0.00119381	-19.7	64	0	0.0822756	0.2	-32.1998	-2.5	-9999	0
2016	1	9	19	0	9	-9999	-0.0014077	-20.1	62	0	0.0769999	0.2	-33.4047	-2.5	-9999	0
2016	1	9	19	30	9	-9999	-0.00152342	-20.5	60	0.1	0.0719785	0.2	-34.4906	-2.5	-9999	0
2016	1	9	20	0	9	-9999	-0.0014336	-20.95	59	0	0.0680628	0.2	-33.0328	-2.5	-9999	0
2016	1	9	20	30	9	-9999	-0.00133151	-21.4	58	0	0.0643314	0.2	-32.1785	-2.51148	-9999	0
2016	1	9	21	0	9	-9999	-0.00229596	-23.05	65	0	0.0623361	0.2	-36.7514	-2.52295	-9999	0
2016	1	9	21	30	9	-9999	-0.0014711	-24.7	72	0	0.0595697	0.2	-39.7866	-2.53648	-9999	0
2016	1	9	22	0	9	-9999	-0.00246186	-25.4	74	0	0.0574671	0.2	-46.7367	-2.55	-9999	0
2016	1	9	22	30	9	-9999	-0.00228647	-26.1	76	0	0.0553754	0.2	-45.8958	-2.55287	-9999	0
2016	1	9	23	0	9	-9999	-0.003564	-26.9	75.5	0	0.0511198	0.2	-61.1874	-2.55574	-9999	0
2016	1	9	23	30	9	-9999	-0.0235615	-27.7	75	0	0.0471631	0.2	10.8637	-2.57295	-9999	0
2016	1	10	0	0	10	-9999	-0.0426519	-28	75.5	0	0.046173	0.2625	48.0175	-2.59016	-9999	0
2016	1	10	0	30	10	-9999	-0.0426519	-28.3	76	0	0.0451981	0.2625	48.0175	-2.62008	-9999	0
2016	1	10	1	0	10	-9999	-0.0224891	-29	75	0	0.0417755	0.2625	8.06355	-2.65	-9999	0
2016	1	10	1	30	10	-9999	-0.0223409	-29.7	74	0	0.0385884	0.2625	33.1019	-2.65	-9999	0
2016	1	10	2	0	10	-9999	-0.0224891	-29.4	74.5	0	0.0399647	0.2625	23.4789	-2.65	-9999	0
2016	1	10	2	30	10	-9999	-0.0224891	-29.1	75	0	0.0413849	0.2625	8.06355	-2.67008	-9999	0
2016	1	10	3	0	10	-9999	-0.0223409	-29.55	74	0	0.0391389	0.2625	32.0944	-2.69016	-9999	0
2016	1	10	3	30	10	-9999	-0.0290125	-30	73	0	0.0370013	0.2625	46.7271	-2.69508	-9999	0
2016	1	10	4	0	10	-9999	-0.0223409	-29.55	74	0	0.0391389	0.2625	32.0944	-2.7	-9999	0
2016	1	10	4	30	10	-9999	-0.0224891	-29.1	75	0	0.0413849	0.2625	8.06355	-2.70574	-9999	0
2016	1	10	5	0	10	-9999	-0.0224891	-29.3	74.5	0	0.0403429	0.2625	23.4789	-2.71148	-9999	0
2016	1	10	5	30	10	-9999	-0.0223409	-29.5	74	0	0.039324	0.2625	32.0944	-2.73074	-9999	0
2016	1	10	6	0	10	-9999	-0.0224891	-29.05	73.5	0	0.0407482	0.2625	8.06355	-2.75	-9999	0
2016	1	10	6	30	10	-9999	-0.0224891	-28.6	73	0	0.0422145	0.2625	8.06355	-2.75	-9999	0
2016	1	10	7	0	10	-9999	-0.0155543	-27.95	73.5	0	0.0451593	0.2625	-2.92902	-2.75	-9999	0
2016	1	10	7	30	10	1	-0.00252396	-27.3	74	0	0.0482896	0.2625	-47.5161	-2.75656	-9999	49.7
2016	1	10	8	0	10	1	-0.00217841	-26.2	72.5	0	0.0523446	0.2625	-44.7851	-2.76311	-9999	99.4
2016	1	10	8	30	10	1	-0.000919095	-25.1	71	0	0.0566573	0.2625	-34.477	-2.77746	-9999	178.25
2016	1	10	9	0	10	1	0.00561168	-23.9	66	0	0.0586751	0.2625	19.7311	-2.7918	0.00561168	257.1
2016	1	10	9	30	10	1	0.00124157	-22.7	61	0	0.0603442	0.2625	23.5954	-2.7959	0.00124157	308.85
2016	1	10	10	0	10	1	0.0044213	-21.4	57	0	0.0632222	0.2625	50.1313	-2.8	-9999	360.6
2016	1	10	10	30	10	1	0.00760104	-20.1	53	0	0.0658225	0.2625	76.6673	-2.80205	0.00760104	366.1
2016	1	10	11	0	10	1	0.0128277	-19.4	50	0	0.0659584	0.2625	85.5801	-2.8041	0.0128277	371.6
2016	1	10	11	30	10	1	0.0183858	-18.7	47	0	0.0658316	0.2625	183.995	-2.81721	0.0183858	374.85
2016	1	10	12	0	10	1	0.0248364	-18.45	46	0	0.0658193	0.2625	224.244	-2.83033	0.0248364	378.1
2016	1	10	12	30	10	1	0.0152355	-18.2	45	0	0.0657727	0.2625	139.636	-2.84877	0.0152355	301.6
2016	1	10	13	0	10	1	0.00816284	-18	44	0	0.0654126	0.2625	39.3704	-2.86721	0.00816284	225.1
2016	1	10	13	30	10	1	0.0178341	-17.8	43	0	0.0650189	0.2625	142.361	-2.87131	0.0178341	176.1
2016	1	10	14	0	10	1	0.0129695	-17.95	45	0	0.0671836	0.2625	87.2011	-2.87541	0.0129695	127.1
2016	1	10	14	30	10	1	0.0077999	-18.1	47	0	0.069282	0.2625	50.7075	-2.88934	0.0077999	92.4
2016	1	10	15	0	10	1	0.00525722	-18.75	49	0	0.0683405	0.2625	18.4273	-2.90328	0.00525722	57.7
2016	1	10	15	30	10	1	0.00471971	-19.4	51	0	0.0672775	0.2625	-22.9362	-2.89344	0.00471971	42.7389
2016	1	10	16	0	10	-9999	0.00235872	-20.35	56.5	0	0.0686671	0.2625	-48.6123	-2.88361	0.00235872	27.7778
2016	1	10	16	30	10	-9999	0.000588384	-21.3	62	0	0.069372	0.2625	-31.5791	-2.86844	0.000588384	13.8889
2016	1	10	17	0	10	-9999	0.00052164	-22.75	67	0	0.0659868	0.2625	-25.1515	-2.85328	0.00052164	0
2016	1	10	17	30	10	-9999	-0.00151328	-24.2	72	0	0.0623107	0.2625	-38.9541	-2.85287	-9999	0
2016	1	10	18	0	10	-9999	-0.00165549	-24.9	72.5	0	0.0589102	0.2625	-37.7296	-2.85246	-9999	0
2016	1	10	18	30	10	-9999	-0.00237269	-25.6	73	0	0.0556697	0.2625	-43.3021	-2.86434	-9999	0
2016	1	10	19	0	10	-9999	-0.00237269	-25.65	73.5	0	0.0557967	0.2625	-43.3021	-2.87623	-9999	0
2016	1	10	19	30	10	-9999	-0.00237269	-25.7	74	0	0.0559212	0.2625	-43.3021	-2.88811	-9999	0
2016	1	10	20	0	10	-9999	-0.00159959	-24.7	72	0	0.0595697	0.2625	-38.0731	-2.9	-9999	0
2016	1	10	20	30	10	-9999	-0.00139044	-23.7	70	0	0.0633543	0.2625	-36.1418	-2.9	-9999	0
2016	1	10	21	0	10	-9999	-0.00147081	-23.6	70.5	0	0.0643792	0.2625	-33.9275	-2.9	-9999	0
2016	1	10	21	30	10	-9999	-0.00178366	-23.5	71	0	0.065417	0.2625	-34.9666	-2.9	-9999	0
2016	1	10	22	0	10	-9999	-0.00159959	-24.6	70.5	0	0.0588568	0.2625	-38.0731	-2.9	-9999	0
2016	1	10	22	30	10	-9999	-0.00237269	-25.7	70	0	0.0528985	0.2625	-43.3021	-2.90984	-9999	0
2016	1	10	23	0	10	-9999	-0.00221962	-26.55	71	0	0.0496442	0.2625	-44.114	-2.91967	-9999	0
2016	1	10	23	30	10	-9999	-0.0105495	-27.4	72	0	0.0465521	0.2625	-22.468	-2.93238	-9999	0
2016	1	11	0	0	11	-9999	-0.0155543	-28.05	73.5	0	0.0447413	0.325	-2.92902	-2.94508	-9999	0
2016	1	11	0	30	11	-9999	-0.0224891	-28.7	75	0	0.0429671	0.325	8.06355	-2.94754	-9999	0
2016	1	11	1	0	11	-9999	-0.0148459	-29.3	74	0	0.0400722	0.325	16.1941	-2.95	-9999	0
2016	1	11	1	30	11	-9999	-0.0216492	-29.9	73	0	0.0373535	0.325	43.8262	-2.95	-9999	0
2016	1	11	2	0	11	-9999	-0.0175563	-30.4	72.5	0	0.0353783	0.325	37.5667	-2.95	-9999	0
2016	1	11	2	30	11	-9999	-0.0145829	-30.9	72	0	0.0334983	0.325	35.2657	-2.95	-9999	0
2016	1	11	3	0	11	-9999	-0.0113011	-31.3	72	0	0.0322393	0.325	33.9173	-2.95	-9999	0
2016	1	11	3	30	11	-9999	-0.0091265	-31.7	72	0	0.0310231	0.325	32.9576	-2.97008	-9999	0
2016	1	11	4	0	11	-9999	-0.0091265	-31.95	71.5	0	0.0300737	0.325	32.9576	-2.99016	-9999	0
2016	1	11	4	30	11	-9999	-0.00540146	-32.2	71	0	0.0291504	0.325	31.7026	-2.99508	-9999	0
2016	1	11	5	0	11	-9999	-0.0049408	-32.45	71.5	0	0.028653	0.325	45.5018	-3	-9999	0
2016	1	11	5	30	11	-9999	-0.00460161	-32.7	72	0	0.0281612	0.325	62.5184	-3.00615	-9999	0
2016	1	11	6	0	11	-9999	-0.00424098	-33.15	71.5	0	0.0267656	0.325	62.5184	-3.0123	-9999	0
2016	1	11	6	30	11	-9999	-0.00347269	-33.6	71	0	0.0254331	0.325	62.5184	-3.02541	-9999	0
2016	1	11	7	0	11	-9999	-0.00303209	-33.4	71.5	0	0.0261192	0.325	62.5184	-3.03852	-9999	0
2016	1	11	7	30	11	1	-0.00303209	-33.2	72	0	0.0268214	0.325	87.7786	-3.04426	-9999	62.6
2016	1	11	8	0	11	1	-0.0108499	-31.1	73	0	0.0333198	0.325	94.194	-3.05	-9999	125.2
2016	1	11	8	30	11	1	-0.0111618	-29	74	0	0.0412185	0.325	22.9726	-3.05533	-9999	191
2016	1	11	9	0	11	1	0.000863784	-25.8	71	0	0.0531678	0.325	22.2533	-3.06066	0.000863784	256.8
2016	1	11	9	30	11	1	0.00170359	-22.6	68	0	0.0678669	0.325	50.1283	-3.06639	0.00170359	295.2
2016	1	11	10	0	11	1	0.00673817	-21.15	64	0	0.0725543	0.325	-31.0015	-3.07213	-9999	333.6
2016	1	11	10	30	11	1	0.0117727	-19.7	60	0	0.0771334	0.325	2.92357	-3.08525	0.0117727	389.1
2016	1	11	11	0	11	1	0.00919911	-18.65	56.5	0	0.0794764	0.325	36.8486	-3.09836	0.00919911	444.6
2016	1	11	11	30	11	1	0.0110716	-17.6	53	0	0.0815073	0.325	115.003	-3.11762	0.0110716	403.35
2016	1	11	12	0	11	1	0.00723168	-16.55	50	0	0.0839959	0.325	86.5294	-3.13689	0.00723168	362.1
2016	1	11	12	30	11	1	0.0129555	-15.5	47	0	0.086178	0.325	158.772	-3.14262	0.0129555	315.25
2016	1	11	13	0	11	1	0.0122917	-15.3	48.5	0	0.0904149	0.325	173.319	-3.14836	0.0122917	268.4
2016	1	11	13	30	11	1	0.00933369	-15.1	50	0	0.0947666	0.325	124.931	-3.14918	0.00933369	195.55
2016	1	11	14	0	11	1	0.00938028	-14.9	48.5	0	0.0934548	0.325	51.3102	-3.15	-9999	122.7
2016	1	11	14	30	11	1	0.00942688	-14.7	47	0	0.0920702	0.325	19.9634	-3.15738	0.00942688	82.45
2016	1	11	15	0	11	1	0.00733784	-15.05	49.5	0	0.0942075	0.325	24.5403	-3.16475	-9999	42.2
2016	1	11	15	30	11	1	0.0052488	-15.4	52	0	0.0961398	0.325	-17.0128	-3.17869	0.0052488	21.6
2016	1	11	16	0	11	-9999	0.00528094	-15.8	55.5	0	0.0992585	0.325	-20.3439	-3.19262	-9999	1
2016	1	11	16	30	11	-9999	0.00531308	-16.2	59	0	0.102059	0.325	-23.675	-3.18934	-9999	0.5
2016	1	11	17	0	11	-9999	0.00534522	-16.95	60.5	0	0.098281	0.325	-12.8712	-3.18607	0.00534522	0
2016	1	11	17	30	11	-9999	0.00066096	-17.7	62	0	0.0945451	0.325	-26.8985	-3.17008	0.00066096	0
2016	1	11	18	0	11	-9999	-0.00013284	-18.7	67.5	0	0.0945453	0.325	-23.7451	-3.1541	-9999	0
2016	1	11	18	30	11	-9999	-0.00092664	-19.7	73	0	0.0938456	0.325	-20.5918	-3.15574	-0.00092664	0
2016	1	11	19	0	11	-9999	-0.000418783	-19.65	72	0	0.0929595	0.325	-24.6585	-3.15738	-9999	0
2016	1	11	19	30	11	-9999	-0.000418783	-19.6	71	0	0.0920638	0.325	-24.6585	-3.15369	-9999	0
2016	1	11	20	0	11	-9999	-0.000418783	-19.75	69	0	0.088322	0.325	-24.6585	-3.15	-9999	0
2016	1	11	20	30	11	-9999	-0.000586976	-19.9	67	0	0.0846596	0.325	-25.625	-3.15	-9999	0
2016	1	11	21	0	11	-9999	-0.000598807	-20.25	68.5	0	0.0839755	0.325	-25.0231	-3.15	-9999	0
2016	1	11	21	30	11	-9999	-0.000557574	-20.6	70	0	0.083249	0.325	-24.6845	-3.15	-9999	0
2016	1	11	22	0	11	-9999	-0.0006156	-20.8	70.5	0	0.0823985	0.325	-33.216	-3.15	-0.0006156	0
2016	1	11	22	30	11	-9999	-0.00056222	-21	71	0	0.08155	0.325	-24.6983	-3.15	-9999	0
2016	1	11	23	0	11	-9999	-0.000518559	-21.15	71.5	0	0.0810567	0.325	-24.3493	-3.15	-9999	0
2016	1	11	23	30	11	-9999	-0.000773553	-21.3	72	0	0.0805611	0.325	-24.8614	-3.15697	-9999	0
2016	1	12	0	0	12	-9999	-0.00109627	-21.45	73	0	0.0806153	0.3875	-25.9626	-3.16393	-9999	0
2016	1	12	0	30	12	-9999	-0.00127928	-21.6	74	0	0.080653	0.3875	-26.0035	-3.18197	-9999	0
2016	1	12	1	0	12	-9999	-0.00127928	-21.6	73.5	0	0.080108	0.3875	-26.0035	-3.2	-9999	0
2016	1	12	1	30	12	-9999	-0.00127928	-21.6	73	0	0.0795631	0.3875	-26.0035	-3.2	-9999	0
2016	1	12	2	0	12	-9999	-0.00149098	-21.8	73.5	0	0.0787147	0.3875	-27.6699	-3.2	-9999	0
2016	1	12	2	30	12	-9999	-0.00184118	-22	74	0	0.0778693	0.3875	-29.4069	-3.2	-9999	0
2016	1	12	3	0	12	-9999	-0.00192798	-22.45	72.5	0	0.0733238	0.3875	-30.4774	-3.2	-9999	0
2016	1	12	3	30	12	-9999	-0.00236353	-22.9	71	0	0.0690028	0.3875	-34.7513	-3.20246	-9999	0
2016	1	12	4	0	12	-9999	-0.00223746	-23.05	73	0	0.0700082	0.3875	-34.1496	-3.20492	-9999	0
2016	1	12	4	30	12	-9999	-0.0020946	-23.2	75	0	0.0709737	0.3875	-33.1829	-3.22623	-9999	0
2016	1	12	5	0	12	-9999	-0.0020946	-23.25	75	0	0.0706587	0.3875	-34.1764	-3.24754	-9999	0
2016	1	12	5	30	12	-9999	-0.00201956	-23.3	75	0	0.0703449	0.3875	-36.9668	-3.25328	-9999	0
2016	1	12	6	0	12	-9999	-0.00163658	-23.55	74.5	0	0.0683362	0.3875	-34.9666	-3.25902	-9999	0
2016	1	12	6	30	12	-9999	-0.00133298	-23.8	74	0	0.0663785	0.3875	-36.6645	-3.26598	-9999	0
2016	1	12	7	0	12	-9999	-0.00116575	-23.75	74.5	0	0.0671264	0.3875	-36.1418	-3.27295	-0.00116575	0
2016	1	12	7	30	12	1	0.0010112	-23.7	75	0	0.0678796	0.3875	2.23735	-3.26967	-9999	67.65
2016	1	12	8	0	12	1	0.00318816	-22.7	71.5	0	0.0707313	0.3875	1.04362	-3.26639	0.00318816	135.3
2016	1	12	8	30	12	1	0.00148392	-21.7	68	0	0.0734665	0.3875	-1.21627	-3.27049	0.00148392	198.05
2016	1	12	9	0	12	1	0.00044712	-20.9	65.5	0	0.0758911	0.3875	22.3414	-3.27459	0.00044712	260.8
2016	1	12	9	30	12	1	0.00556632	-20.1	63	0	0.0782418	0.3875	31.5508	-3.2791	0.00556632	306
2016	1	12	10	0	12	1	0.00934913	-19.2	61.5	0	0.0825336	0.3875	73.5964	-3.28361	-9999	351.2
2016	1	12	10	30	12	1	0.0131319	-18.3	60	0	0.0869545	0.3875	115.642	-3.28607	0.0131319	399.25
2016	1	12	11	0	12	1	0.00896057	-17.6	57	0	0.0876587	0.3875	62.9158	-3.28852	0.00896057	447.3
2016	1	12	11	30	12	1	0.013027	-16.9	54	0	0.0880912	0.3875	61.1665	-3.29098	0.013027	411.7
2016	1	12	12	0	12	1	0.00751083	-16	52.5	0	0.0923426	0.3875	81.4353	-3.29344	0.00751083	376.1
2016	1	12	12	30	12	1	0.0060912	-15.1	51	0	0.096662	0.3875	48.8595	-3.29754	0.0060912	336.55
2016	1	12	13	0	12	1	0.00828177	-14.45	49.5	0	0.0989831	0.3875	74.7063	-3.30164	0.00828177	297
2016	1	12	13	30	12	1	0.011251	-13.8	48	0	0.101236	0.3875	90.296	-3.30082	0.011251	253.8
2016	1	12	14	0	12	1	0.00787074	-13.65	47.5	0	0.101416	0.3875	56.0302	-3.3	0.00787074	210.6
2016	1	12	14	30	12	1	0.00390874	-13.5	47	0	0.101584	0.3875	20.6746	-3.3041	0.00390874	141.9
2016	1	12	15	0	12	1	0.00386137	-14.15	49.5	0	0.101451	0.3875	54.1296	-3.3082	0.00386137	73.2
2016	1	12	15	30	12	1	0.00229457	-14.8	52	0	0.101029	0.3875	6.07995	-3.31025	0.00229457	50.4889
2016	1	12	16	0	12	-9999	-0.000933768	-15.55	53	0	0.096777	0.3875	-66.7859	-3.3123	-0.000933768	27.7778
2016	1	12	16	30	12	-9999	0.00531624	-16.3	54	0	0.0926327	0.3875	-60.0365	-3.28566	0.00531624	13.8889
2016	1	12	17	0	12	-9999	0.00036936	-16.8	55	0	0.0904791	0.3875	-53.2871	-3.25902	0.00036936	0
2016	1	12	17	30	12	-9999	0.00083592	-17.3	56	0	0.0883298	0.3875	-42.2374	-3.25615	0.00083592	0
2016	1	12	18	0	12	-9999	0.00108216	-17.65	62	0	0.0949459	0.3875	-31.1877	-3.25328	0.00108216	0
2016	1	12	18	30	12	-9999	-0.00047304	-18	68	0	0.101092	0.3875	-47.484	-3.23279	-0.00047304	0
2016	1	12	19	0	12	-9999	0.000927288	-18.35	70	0	0.101016	0.3875	-39.5337	-3.2123	-9999	0
2016	1	12	19	30	12	-9999	0.00232762	-18.7	72	0	0.100848	0.3875	-31.5835	-3.20615	-9999	0
2016	1	12	20	0	12	-9999	0.00372794	-19	72.5	0	0.0989774	0.3875	-23.6333	-3.2	0.00372794	0
2016	1	12	20	30	12	-9999	0.0016051	-19.3	73	0	0.0971298	0.3875	-15.2776	-3.21066	0.0016051	0
2016	1	12	21	0	12	-9999	0.00445895	-19.5	73.5	0	0.096129	0.3875	-11.853	-3.22131	0.00445895	0
2016	1	12	21	30	12	-9999	0.00133812	-19.7	74	0	0.0951312	0.3875	-21.5986	-3.22213	0.00133812	0
2016	1	12	22	0	12	-9999	0.00329832	-19.9	75	0	0.0947682	0.3875	-17.7857	-3.22295	0.00329832	0
2016	1	12	22	30	12	-9999	0.0056331	-20.1	76	0	0.094387	0.3875	-16.892	-3.22172	0.0056331	0
2016	1	12	23	0	12	-9999	-0.000598807	-20.25	76	0	0.0931699	0.3875	-25.8486	-3.22049	-9999	0
2016	1	12	23	30	12	-9999	-0.000622515	-20.4	76	0	0.091967	0.3875	-26.7205	-3.18934	-9999	0
2016	1	13	0	0	13	-9999	-0.000614328	-20.3	76	0	0.0927674	0.45	-26.2226	-3.1582	-9999	0
2016	1	13	0	30	13	-9999	0.00195372	-20.2	76	0	0.093574	0.45	-3.08246	-3.17787	0.00195372	0
2016	1	13	1	0	13	-9999	-0.000587983	-20.35	76.5	0	0.0929741	0.45	-25.8155	-3.19754	-9999	0
2016	1	13	1	30	13	-9999	-0.000685978	-20.5	77	0	0.0923724	0.45	-26.7809	-3.20984	-9999	0
2016	1	13	2	0	13	-9999	-0.000618785	-20.95	76.5	0	0.088251	0.45	-25.8183	-3.22213	-9999	0
2016	1	13	2	30	13	-9999	-0.000921687	-21.4	76	0	0.0842963	0.45	-26.5383	-3.2123	-9999	0
2016	1	13	3	0	13	-9999	-0.00169254	-21.95	78	0	0.0824402	0.45	-29.6492	-3.20246	-9999	0
2016	1	13	3	30	13	-9999	-0.00192798	-22.5	80	0	0.0805524	0.45	-31.3755	-3.21639	-9999	0
2016	1	13	4	0	13	-9999	-0.00192798	-22.5	79	0	0.0795455	0.45	-31.3755	-3.23033	-9999	0
2016	1	13	4	30	13	-9999	-0.00192798	-22.5	78	0	0.0785386	0.45	-31.3755	-3.23934	-9999	0
2016	1	13	5	0	13	-9999	-0.00182115	-22.55	78	0	0.0781923	0.45	-31.2736	-3.24836	-9999	0
2016	1	13	5	30	13	-9999	-0.00188056	-22.6	78	0	0.0778473	0.45	-30.3722	-3.25492	-9999	0
2016	1	13	6	0	13	-9999	-0.00188056	-22.6	77	0	0.0768492	0.45	-30.3722	-3.26148	-9999	0
2016	1	13	6	30	13	-9999	-0.00188056	-22.6	76	0	0.0758512	0.45	-30.3722	-3.26434	-9999	0.15
2016	1	13	7	0	13	-9999	-0.00169254	-21.9	77	0	0.0817418	0.45	-29.9314	-3.26721	-9999	0.3
2016	1	13	7	30	13	1	-0.00246888	-21.2	78	0	0.0880403	0.45	-1.58351	-3.29959	-0.00246888	16.05
2016	1	13	8	0	13	1	-0.00119912	-20.75	76.5	0	0.0898009	0.45	-1.39137	-3.33197	-9999	31.8
2016	1	13	8	30	13	1	7.0632e-05	-20.3	75	0	0.0915468	0.45	51.276	-3.3168	7.0632e-05	108.25
2016	1	13	9	0	13	1	0.00850268	-19.55	71.5	0	0.0931119	0.45	103.943	-3.30164	-9999	184.7
2016	1	13	9	30	13	1	0.0169347	-18.8	68	0	0.0944356	0.45	156.611	-3.31107	0.0169347	236.75
2016	1	13	10	0	13	1	0.0159662	-18.25	66.5	0	0.0967852	0.45	43.3607	-3.32049	-9999	288.8
2016	1	13	10	30	13	1	0.0149977	-17.7	65	0	0.0991199	0.45	106.085	-3.33238	0.0149977	338.25
2016	1	13	11	0	13	1	0.00945849	-17.15	63	0	0.100635	0.45	92.4109	-3.34426	0.00945849	387.7
2016	1	13	11	30	13	1	0.0112289	-16.6	61	0	0.102047	0.45	109.494	-3.34918	0.0112289	384.65
2016	1	13	12	0	13	1	0.011133	-16.2	60.5	0	0.104653	0.45	146.962	-3.3541	-9999	381.6
2016	1	13	12	30	13	1	0.0110372	-15.8	60	0	0.107306	0.45	116.541	-3.36107	0.0110372	314.4
2016	1	13	13	0	13	1	0.00972425	-15.6	59	0	0.107287	0.45	88.361	-3.36803	0.00972425	247.2
2016	1	13	13	30	13	1	0.00903834	-15.4	58	0	0.107233	0.45	54.7678	-3.38607	0.00903834	185.55
2016	1	13	14	0	13	1	0.00677478	-15.15	56.5	0	0.106644	0.45	16.1008	-3.4041	-9999	123.9
2016	1	13	14	30	13	1	0.0110314	-14.9	55	0	0.10598	0.45	7.22517	-3.40492	-9999	83.15
2016	1	13	15	0	13	1	0.00886188	-15.2	58.5	0	0.109964	0.45	-1.65044	-3.40574	-9999	42.4
2016	1	13	15	30	13	1	0.00201528	-15.5	62	0	0.113682	0.45	-10.526	-3.4	0.00201528	21.5
2016	1	13	16	0	13	-9999	0.00200102	-15.9	64	0	0.113512	0.45	-37.3368	-3.39426	0.00200102	0.6
2016	1	13	16	30	13	-9999	-0.0008424	-16.3	66	0	0.113218	0.45	-32.4188	-3.37459	-0.0008424	0.3
2016	1	13	17	0	13	-9999	0.00252785	-17.05	64.5	0	0.103902	0.45	-27.5009	-3.35492	0.00252785	0
2016	1	13	17	30	13	-9999	0.0020101	-17.8	63	0	0.0952603	0.45	-19.7647	-3.34713	0.0020101	0
2016	1	13	18	0	13	-9999	-0.000170866	-19.5	67.5	0	0.0882817	0.45	-25.6115	-3.33934	-9999	0
2016	1	13	18	30	13	-9999	-0.000446811	-21.2	72	0	0.081268	0.45	-24.4522	-3.31967	-9999	0
2016	1	13	19	0	13	-9999	-0.00142648	-21.8	74.5	0	0.0797857	0.45	-28.0586	-3.3	-9999	0
2016	1	13	19	30	13	-9999	-0.00192798	-22.4	77	0	0.0782196	0.45	-29.5098	-3.28893	-9999	0
2016	1	13	20	0	13	-9999	-0.00236353	-23	78	0	0.0751362	0.45	-35.9072	-3.27787	-9999	0
2016	1	13	20	30	13	-9999	-0.00133294	-23.6	79	0	0.0721413	0.45	-35.6763	-3.26557	-9999	0
2016	1	13	21	0	13	-9999	-0.00133298	-24.15	78.5	0	0.0682415	0.45	-38.9541	-3.25328	-9999	0
2016	1	13	21	30	13	-9999	-0.00139878	-24.7	78	0	0.0645338	0.45	-64.5166	-3.25164	-9999	0
2016	1	13	22	0	13	-9999	-0.00203433	-25.5	76.5	0	0.0588715	0.45	-34.7558	-3.25	-9999	0
2016	1	13	22	30	13	-9999	-0.000745362	-26.3	75	0	0.0536564	0.45	-12.2067	-3.23648	-9999	0
2016	1	13	23	0	13	-9999	-0.0064847	-27.3	74	0	0.0482896	0.45	9.94312	-3.22295	-9999	0
2016	1	13	23	30	13	-9999	-0.00965371	-28.3	73	0	0.043414	0.45	117.212	-3.21148	-9999	0
2016	1	14	0	0	14	-9999	-0.00965371	-28.6	74	0	0.0427928	0.3875	117.212	-3.2	-9999	0
2016	1	14	0	30	14	-9999	-0.00965371	-28.9	75	0	0.0421693	0.3875	117.212	-3.2	-9999	0
2016	1	14	1	0	14	-9999	-0.00518212	-29.35	74	0	0.0398839	0.3875	153.9	-3.2	-9999	0
2016	1	14	1	30	14	-9999	-0.0104503	-29.8	73	0	0.0377087	0.3875	137.485	-3.2	-9999	0
2016	1	14	2	0	14	-9999	-0.00929206	-30.35	72.5	0	0.0355469	0.3875	141.751	-3.2	-9999	0
2016	1	14	2	30	14	-9999	-0.0100496	-30.9	72	0	0.0334983	0.3875	123.017	-3.2	-9999	0
2016	1	14	3	0	14	-9999	-0.00663043	-31.45	71	0	0.0313369	0.3875	128.441	-3.2	-9999	0
2016	1	14	3	30	14	-9999	-0.0048571	-32	70	0	0.029301	0.3875	123.792	-3.2	-9999	0
2016	1	14	4	0	14	-9999	-0.00215747	-32.25	70.5	0	0.0288053	0.3875	136.056	-3.2	-9999	0
2016	1	14	4	30	14	-9999	-0.00255628	-32.5	71	0	0.0283149	0.3875	124.825	-3.2	-9999	0
2016	1	14	5	0	14	-9999	-0.00243717	-32.7	71	0	0.02777	0.3875	124.773	-3.2	-9999	0
2016	1	14	5	30	14	-9999	-0.00243717	-32.9	71	0	0.0272346	0.3875	124.773	-3.2	-9999	0
2016	1	14	6	0	14	-9999	-0.00243717	-33.45	70	0	0.0254463	0.3875	124.773	-3.2	-9999	0
2016	1	14	6	30	14	-9999	-0.00303209	-34	69	0	0.0237638	0.3875	105.584	-3.18689	-9999	0.05
2016	1	14	7	0	14	-9999	-0.00243717	-33.65	70.5	0	0.0251304	0.3875	124.773	-3.17377	-9999	0.1
2016	1	14	7	30	14	1	-0.00243717	-33.3	72	0	0.0265605	0.3875	124.773	-3.16598	-9999	68.8
2016	1	14	8	0	14	1	-0.00456078	-31.8	72.5	0	0.0309389	0.3875	54.3095	-3.1582	-9999	137.5
2016	1	14	8	30	14	1	-0.00601666	-30.3	73	0	0.0359626	0.3875	24.7396	-3.14098	-9999	207.45
2016	1	14	9	0	14	1	0.000393174	-27.85	71	0	0.0440305	0.3875	-4.83026	-3.12377	-9999	277.4
2016	1	14	9	30	14	1	0.00498719	-25.4	69	0	0.0535842	0.3875	86.6082	-3.11639	-9999	307.4
2016	1	14	10	0	14	1	0.00669336	-22.45	66.5	0	0.0672557	0.3875	-5.3901	-3.10902	-9999	337.4
2016	1	14	10	30	14	1	0.0280629	-19.5	64	0	0.0837042	0.3875	163.302	-3.09426	0.0280629	362.4
2016	1	14	11	0	14	1	0.0116173	-18.35	60.5	0	0.0873069	0.3875	77.7781	-3.07951	0.0116173	387.4
2016	1	14	11	30	14	1	0.0118044	-17.2	57	0	0.090668	0.3875	65.0852	-3.06598	0.0118044	406.65
2016	1	14	12	0	14	1	0.00840531	-16.6	52.5	0	0.0878271	0.3875	103.155	-3.05246	0.00840531	425.9
2016	1	14	12	30	14	1	0.0132263	-16	48	0	0.0844275	0.3875	135.621	-3.02869	0.0132263	384.95
2016	1	14	13	0	14	1	0.0149977	-15.7	46.5	0	0.0838569	0.3875	117.747	-3.00492	0.0149977	344
2016	1	14	13	30	14	1	0.0130426	-15.4	45	0	0.0831979	0.3875	149.344	-2.9832	0.0130426	259.35
2016	1	14	14	0	14	1	0.00923761	-15.4	45	0	0.0831979	0.3875	58.6789	-2.96148	0.00923761	174.7
2016	1	14	14	30	14	1	0.004212	-15.4	45	0	0.0831979	0.3875	85.7795	-2.93934	0.004212	134.7
2016	1	14	15	0	14	1	0.00204962	-16.55	48.5	0	0.0814761	0.3875	39.0574	-2.91721	0.00204962	94.7
2016	1	14	15	30	14	1	0.00260302	-17.7	52	0	0.0792959	0.3875	48.8027	-2.89221	0.00260302	61.2389
2016	1	14	16	0	14	-9999	0.00207738	-19.15	58.5	0	0.0788449	0.3875	-15.8097	-2.86721	-9999	27.7778
2016	1	14	16	30	14	-9999	0.00190049	-20.6	65	0	0.0773027	0.3875	-12.5438	-2.84303	-9999	13.8889
2016	1	14	17	0	14	-9999	0.0007222	-21.7	70	0	0.0756273	0.3875	-17.604	-2.81885	-9999	0
2016	1	14	17	30	14	-9999	-0.000174743	-22.8	75	0	0.0735394	0.3875	-32.8944	-2.79385	-9999	0
2016	1	14	18	0	14	-9999	-0.000826488	-23.6	74.5	0	0.068032	0.3875	-36.493	-2.76885	-9999	0
2016	1	14	18	30	14	-9999	-0.00106514	-24.4	74	0	0.0629011	0.3875	-32.415	-2.74795	-9999	0
2016	1	14	19	0	14	-9999	-0.00100725	-26	74.5	0	0.0547804	0.3875	-13.9078	-2.72705	-9999	0
2016	1	14	19	30	14	-9999	-0.00662634	-27.6	75	0	0.0476023	0.3875	63.595	-2.70697	-9999	0
2016	1	14	20	0	14	-9999	-0.00965371	-28.7	74.5	0	0.0426806	0.3875	117.212	-2.68689	-9999	0
2016	1	14	20	30	14	-9999	-0.0104503	-29.8	74	0	0.0382252	0.3875	137.485	-2.66598	-9999	0
2016	1	14	21	0	14	-9999	-0.00943478	-29.5	75	0	0.0398554	0.3875	129.704	-2.64508	-9999	0
2016	1	14	21	30	14	-9999	-0.00630667	-29.2	76	0	0.0415443	0.3875	179.237	-2.61844	-9999	0
2016	1	14	22	0	14	-9999	-0.00929206	-30.35	73.5	0	0.0360372	0.3875	141.751	-2.5918	-9999	0
2016	1	14	22	30	14	-9999	-0.00663043	-31.5	71	0	0.0311867	0.3875	128.441	-2.5709	-9999	0
2016	1	14	23	0	14	-9999	-0.00523597	-31.85	70	0	0.0297283	0.3875	123.792	-2.55	-9999	0
2016	1	14	23	30	14	-9999	-0.00215747	-32.2	69	0	0.0283292	0.3875	128.527	-2.5459	-9999	0
2016	1	15	0	0	15	-9999	-0.00221318	-32.3	70.5	0	0.0286661	0.325	129.388	-2.5418	-9999	0
2016	1	15	0	30	15	-9999	-0.00231219	-32.4	72	0	0.0289937	0.325	129.765	-2.50574	-9999	0
2016	1	15	1	0	15	-9999	-0.00243717	-32.75	71.5	0	0.0278299	0.325	124.773	-2.46967	-9999	0
2016	1	15	1	30	15	-9999	-0.00243717	-33.1	71	0	0.0267085	0.325	124.773	-2.45984	-9999	0
2016	1	15	2	0	15	-9999	-0.00243717	-33.45	70.5	0	0.0256281	0.325	124.773	-2.45	-9999	0
2016	1	15	2	30	15	-9999	-0.00243717	-33.8	70	0	0.0245872	0.325	124.773	-2.44959	-9999	0
2016	1	15	3	0	15	-9999	-0.00303209	-34	70	0	0.0241082	0.325	105.584	-2.44918	-9999	0
2016	1	15	3	30	15	-9999	-0.00303209	-34.2	70	0	0.0236375	0.325	105.584	-2.4459	-9999	0
2016	1	15	4	0	15	-9999	-0.00303209	-34.1	69.5	0	0.0237013	0.325	105.584	-2.44262	-9999	0
2016	1	15	4	30	15	-9999	-0.0010219	-34	69	0	0.0237638	0.325	49.4094	-2.40287	-0.0010219	0
2016	1	15	5	0	15	-9999	-0.00243717	-33.75	69.5	0	0.0245318	0.325	38.2048	-2.36311	-9999	0
2016	1	15	5	30	15	-9999	-0.00243717	-33.5	70	0	0.0253219	0.325	27.0002	-2.36885	-9999	0
2016	1	15	6	0	15	-9999	-0.00243717	-32.95	70.5	0	0.0269114	0.325	38.4305	-2.37459	-9999	0
2016	1	15	6	30	15	-9999	-0.00231219	-32.4	71	0	0.028591	0.325	49.8607	-2.3873	-9999	0.4
2016	1	15	7	0	15	-9999	-0.0048571	-32.15	71	0	0.0292917	0.325	38.1396	-2.4	-9999	0.8
2016	1	15	7	30	15	1	-0.0438218	-31.9	71	0	0.0300079	0.325	78.0287	-2.39631	-0.0438218	12.75
2016	1	15	8	0	15	1	-0.0432368	-30.8	71.5	0	0.0335851	0.325	63.0231	-2.39262	-9999	24.7
2016	1	15	8	30	15	1	-0.0426519	-29.7	72	0	0.0375454	0.325	48.0175	-2.37131	-0.0426519	66.05
2016	1	15	9	0	15	1	-0.0104857	-28.4	71.5	0	0.042127	0.325	101.219	-2.35	-9999	107.4
2016	1	15	9	30	15	1	0.00622529	-27.1	71	0	0.0471952	0.325	94.0412	-2.3582	-9999	172.8
2016	1	15	10	0	15	1	0.00666606	-25.45	69.5	0	0.053728	0.325	94.8442	-2.36639	-9999	238.2
2016	1	15	10	30	15	1	0.00765023	-23.8	68	0	0.0609964	0.325	64.4738	-2.37869	-9999	266.85
2016	1	15	11	0	15	1	0.00922239	-21.35	66.5	0	0.0740825	0.325	154.817	-2.39098	-9999	295.5
2016	1	15	11	30	15	1	0.0133547	-18.9	65	0	0.0895009	0.325	111.456	-2.39303	-9999	342.2
2016	1	15	12	0	15	1	0.0153956	-18.15	61.5	0	0.0902721	0.325	139.835	-2.39508	0.0153956	388.9
2016	1	15	12	30	15	1	0.0162723	-17.4	58	0	0.0907161	0.325	169.524	-2.39836	0.0162723	373.3
2016	1	15	13	0	15	1	0.01056	-16.75	56	0	0.0925115	0.325	140.162	-2.40164	-9999	357.7
2016	1	15	13	30	15	1	0.00484769	-16.1	54	0	0.0941923	0.325	33.475	-2.42295	0.00484769	240.05
2016	1	15	14	0	15	1	0.0149673	-16.35	55	0	0.0939547	0.325	109.453	-2.44426	0.0149673	122.4
2016	1	15	14	30	15	1	0.00835702	-16.6	56	0	0.0936823	0.325	60.1585	-2.44713	0.00835702	84.95
2016	1	15	15	0	15	1	0.00871049	-17	58.5	0	0.0946335	0.325	29.3504	-2.45	0.00871049	47.5
2016	1	15	15	30	15	1	0.0053726	-17.4	61	0	0.0954083	0.325	16.4922	-2.45205	-9999	24.05
2016	1	15	16	0	15	-9999	0.00203472	-18.25	63	0	0.0916913	0.325	-13.2156	-2.4541	0.00203472	0.6
2016	1	15	16	30	15	-9999	0.00208505	-19.1	65	0	0.0879816	0.325	-14.6801	-2.46107	-9999	0.3
2016	1	15	17	0	15	-9999	0.00213538	-19.7	67.5	0	0.086775	0.325	-14.1074	-2.46803	-9999	0
2016	1	15	17	30	15	-9999	0.0021857	-20.3	70	0	0.0854437	0.325	-13.0064	-2.47828	0.0021857	0
2016	1	15	18	0	15	-9999	0.00221758	-20.1	69.5	0	0.0863144	0.325	-37.4074	-2.48852	-9999	0
2016	1	15	18	30	15	-9999	0.00219877	-19.9	69	0	0.0871868	0.325	-34.9369	-2.49385	-9999	0
2016	1	15	19	0	15	-9999	0.00165176	-21.45	73	0	0.0806153	0.325	-32.4663	-2.49918	-9999	0
2016	1	15	19	30	15	-9999	-0.00169841	-23	77	0	0.0741729	0.325	-29.9958	-2.49959	-0.00169841	0
2016	1	15	20	0	15	-9999	7.2252e-05	-23.7	76	0	0.0687847	0.325	-23.1902	-2.5	-9999	0
2016	1	15	20	30	15	-9999	-0.000232668	-24.4	75	0	0.0637511	0.325	-16.3847	-2.5	-9999	0
2016	1	15	21	0	15	-9999	-0.000466598	-25.35	75.5	0	0.0588986	0.325	-31.6728	-2.5	-9999	0
2016	1	15	21	30	15	-9999	0.000608611	-26.3	76	0	0.0543718	0.325	-14.8258	-2.50287	-9999	0
2016	1	15	22	0	15	-9999	0.000308837	-26.7	76.5	0	0.0527583	0.325	-8.37654	-2.50574	-9999	0
2016	1	15	22	30	15	-9999	0.000346032	-27.1	77	0	0.0511835	0.325	0.405499	-2.50738	-9999	0
2016	1	15	23	0	15	-9999	-0.00805993	-27.85	74	0	0.045891	0.325	93.5241	-2.50902	-9999	0
2016	1	15	23	30	15	-9999	-0.00965371	-28.6	71	0	0.0410579	0.325	117.212	-2.51967	-9999	0
2016	1	16	0	0	16	-9999	-0.00965371	-28.55	71.5	0	0.0415408	0.2625	117.212	-2.53033	-9999	0
2016	1	16	0	30	16	-9999	-0.00965371	-28.5	72	0	0.0420272	0.2625	117.212	-2.54016	-9999	0
2016	1	16	1	0	16	-9999	-0.00965371	-28.8	72	0	0.0408639	0.2625	117.212	-2.55	-9999	0
2016	1	16	1	30	16	-9999	-0.00630667	-29.1	72	0	0.0397295	0.2625	179.237	-2.55533	-9999	0
2016	1	16	2	0	16	-9999	-0.00943478	-29.65	73	0	0.0382472	0.2625	129.704	-2.56066	-9999	0
2016	1	16	2	30	16	-9999	-0.0104503	-30.2	74	0	0.0368032	0.2625	155.755	-2.56107	-9999	0
2016	1	16	3	0	16	-9999	-0.0100496	-30.9	73	0	0.0339636	0.2625	123.017	-2.56148	-9999	0
2016	1	16	3	30	16	-9999	-0.00523597	-31.6	72	0	0.0313232	0.2625	123.792	-2.56598	-9999	0
2016	1	16	4	0	16	-9999	-0.00523597	-31.85	72	0	0.0305777	0.2625	123.792	-2.57049	-9999	0
2016	1	16	4	30	16	-9999	-0.0048571	-32.1	72	0	0.0298483	0.2625	123.792	-2.58525	-9999	0
2016	1	16	5	0	16	-9999	-0.00243717	-32.75	71	0	0.0276353	0.2625	124.773	-2.6	-9999	0
2016	1	16	5	30	16	-9999	-0.00243717	-33.4	70	0	0.0255712	0.2625	124.773	-2.60492	-9999	0
2016	1	16	6	0	16	-9999	-0.00243717	-33.65	70.5	0	0.0251304	0.2625	124.773	-2.60984	-9999	0
2016	1	16	6	30	16	-9999	-0.00243717	-33.9	71	0	0.0246945	0.2625	124.773	-2.62992	-9999	0
2016	1	16	7	0	16	-9999	-0.00243717	-33.85	71	0	0.0248162	0.2625	124.773	-2.65	-9999	0
2016	1	16	7	30	16	1	0.000165888	-33.8	71	0	0.0249385	0.2625	5.94865	-2.65	0.000165888	70.85
2016	1	16	8	0	16	1	-0.00056376	-31.9	72	0	0.0304306	0.2625	12.0066	-2.65	-0.00056376	141.7
2016	1	16	8	30	16	1	-1.2312e-05	-30	73	0	0.0370013	0.2625	2.34726	-2.64959	-1.2312e-05	202.65
2016	1	16	9	0	16	1	0.000377784	-27.4	71.5	0	0.0462289	0.2625	9.64793	-2.64918	0.000377784	263.6
2016	1	16	9	30	16	1	0.00234025	-24.8	70	0	0.0573948	0.2625	39.9109	-2.65902	-9999	303.05
2016	1	16	10	0	16	1	0.00430272	-23.1	66	0	0.0630146	0.2625	70.1739	-2.66885	0.00430272	342.5
2016	1	16	10	30	16	1	0.00946728	-21.4	62	0	0.068768	0.2625	100.437	-2.66721	0.00946728	392.25
2016	1	16	11	0	16	1	0.0111553	-20.35	59	0	0.0717055	0.2625	89.1284	-2.66557	0.0111553	442
2016	1	16	11	30	16	1	0.0168732	-19.3	56	0	0.0745105	0.2625	115.374	-2.67295	0.0168732	462.35
2016	1	16	12	0	16	1	0.0101202	-18.8	54.5	0	0.0756874	0.2625	141.719	-2.68033	0.0101202	482.7
2016	1	16	12	30	16	1	0.00721872	-18.3	53	0	0.0768098	0.2625	140.715	-2.68811	0.00721872	416.7
2016	1	16	13	0	16	1	0.00519048	-17.75	51.5	0	0.0782018	0.2625	67.9796	-2.6959	0.00519048	350.7
2016	1	16	13	30	16	1	0.00484056	-17.2	50	0	0.0795333	0.2625	111.623	-2.69549	0.00484056	284.1
2016	1	16	14	0	16	1	0.0042917	-17	49.5	0	0.0800745	0.2625	54.9189	-2.69508	0.0042917	217.5
2016	1	16	14	30	16	1	0.00339746	-16.8	49	0	0.0806087	0.2625	41.252	-2.72213	0.00339746	151
2016	1	16	15	0	16	1	0.00290304	-17.6	51	0	0.0784315	0.2625	40.3751	-2.74918	0.00290304	84.5
2016	1	16	15	30	16	1	0.00163426	-18.4	53	0	0.0761589	0.2625	0.449945	-2.75451	0.00163426	43.05
2016	1	16	16	0	16	-9999	0.00067716	-19.65	59	0	0.0761752	0.2625	-48.3422	-2.75984	0.00067716	1.6
2016	1	16	16	30	16	-9999	-0.00138672	-20.9	65	0	0.0753118	0.2625	-66.7666	-2.7541	-0.00138672	0.8
2016	1	16	17	0	16	-9999	-0.000477576	-21.95	69	0	0.0729279	0.2625	-53.9306	-2.74836	-0.000477576	0
2016	1	16	17	30	16	-9999	0.00030924	-23	73	0	0.0703198	0.2625	-32.5742	-2.74344	-9999	0
2016	1	16	18	0	16	-9999	0.000346173	-24.15	73.5	0	0.063895	0.2625	-38.4028	-2.73852	-9999	0
2016	1	16	18	30	16	-9999	0.000114017	-25.3	74	0	0.0579909	0.2625	-33.8084	-2.72377	-9999	0
2016	1	16	19	0	16	-9999	0.000265398	-25.1	75.5	0	0.0602482	0.2625	-73.6363	-2.70902	-9999	0
2016	1	16	19	30	16	-9999	0.000265398	-24.9	77	0	0.0625667	0.2625	-102.271	-2.70451	-9999	0
2016	1	16	20	0	16	-9999	0.000397251	-24.15	75	0	0.0651989	0.2625	-53.9037	-2.7	-9999	0
2016	1	16	20	30	16	-9999	-0.00392688	-23.4	73	0	0.067862	0.2625	-71.0454	-2.7	-0.00392688	0
2016	1	16	21	0	16	-9999	-0.00294386	-23.8	73	0	0.0654815	0.2625	-52.1671	-2.7	-0.00294386	0
2016	1	16	21	30	16	-9999	-0.000565056	-24.2	73	0	0.0631762	0.2625	-26.1298	-2.7	-0.000565056	0
2016	1	16	22	0	16	-9999	-0.0012623	-24.3	72.5	0	0.0621825	0.2625	-30.4941	-2.7	-9999	0
2016	1	16	22	30	16	-9999	-0.00195955	-24.4	72	0	0.061201	0.2625	-34.8584	-2.69672	-9999	0
2016	1	16	23	0	16	-9999	-0.0026568	-24.55	73	0	0.061219	0.2625	-39.2227	-2.69344	-0.0026568	0
2016	1	16	23	30	16	-9999	-0.00213516	-24.7	74	0	0.0612244	0.2625	-32.6586	-2.67049	-9999	0
2016	1	17	0	0	17	-9999	-0.00161352	-25.25	75	0	0.0590416	0.2	-26.0944	-2.64754	-0.00161352	0
2016	1	17	0	30	17	-9999	-0.0016848	-25.8	76	0	0.056912	0.2	-24.9142	-2.67172	-0.0016848	0
2016	1	17	1	0	17	-9999	-0.00232632	-27.2	74.5	0	0.0490669	0.2	-31.8905	-2.6959	-0.00232632	0
2016	1	17	1	30	17	-9999	-0.00965371	-28.6	73	0	0.0422145	0.2	117.212	-2.68852	-9999	0
2016	1	17	2	0	17	-9999	-0.00518212	-29.3	74.5	0	0.0403429	0.2	153.9	-2.68115	-9999	0
2016	1	17	2	30	17	-9999	-0.0104503	-30	76	0	0.0385219	0.2	128.722	-2.67746	-9999	0
2016	1	17	3	0	17	-9999	-0.00929206	-30.4	75	0	0.0365982	0.2	141.751	-2.67377	-9999	0
2016	1	17	3	30	17	-9999	-0.00822807	-30.8	74	0	0.0347594	0.2	132.144	-2.675	-9999	0
2016	1	17	4	0	17	-9999	-0.00663043	-31.5	73	0	0.0320652	0.2	128.441	-2.67623	-9999	0
2016	1	17	4	30	17	-9999	-0.00215747	-32.2	72	0	0.0295609	0.2	128.527	-2.6668	-9999	0
2016	1	17	5	0	17	-9999	-0.00118454	-32.7	72	0	0.0281612	0.2	-12.2847	-2.65738	-0.00118454	0
2016	1	17	5	30	17	-9999	-0.00243717	-33.2	72	0	0.0268214	0.2	124.773	-2.65779	-9999	0
2016	1	17	6	0	17	-9999	-0.00243717	-33.45	71	0	0.0258098	0.2	124.773	-2.6582	-9999	0
2016	1	17	6	30	17	-9999	-0.00243717	-33.7	70	0	0.02483	0.2	124.773	-2.66434	-9999	0
2016	1	17	7	0	17	-9999	0.000710856	-33.5	70.5	0	0.0255028	0.2	28.6988	-2.67049	0.000710856	0
2016	1	17	7	30	17	1	0.000283824	-33.3	71	0	0.0261916	0.2	16.8579	-2.66434	0.000283824	68.4
2016	1	17	8	0	17	1	0.00044064	-31.75	71.5	0	0.0306596	0.2	32.4553	-2.6582	0.00044064	136.8
2016	1	17	8	30	17	1	0.00034344	-30.2	72	0	0.0358085	0.2	53.7176	-2.65164	0.00034344	207.35
2016	1	17	9	0	17	1	-0.00011232	-27	71.5	0	0.0479676	0.2	74.98	-2.64508	-9999	277.9
2016	1	17	9	30	17	1	-0.00056808	-23.8	71	0	0.0636875	0.2	36.4136	-2.63402	-9999	307.8
2016	1	17	10	0	17	1	-0.00102384	-22.35	66.5	0	0.0678521	0.2	30.9383	-2.62295	-0.00102384	337.7
2016	1	17	10	30	17	1	0.0112277	-20.9	62	0	0.0718359	0.2	196.984	-2.61557	0.0112277	379.6
2016	1	17	11	0	17	1	0.00936855	-20	59.5	0	0.0745364	0.2	152.128	-2.6082	0.00936855	421.5
2016	1	17	11	30	17	1	0.00733536	-19.1	57	0	0.0771531	0.2	192.286	-2.60205	0.00733536	423.6
2016	1	17	12	0	17	1	0.00866157	-18.8	56	0	0.0777705	0.2	240.329	-2.5959	0.00866157	425.7
2016	1	17	12	30	17	1	0.00588384	-18.5	55	0	0.0783624	0.2	198.489	-2.59385	0.00588384	379.85
2016	1	17	13	0	17	1	0.006318	-18.15	54	0	0.0792633	0.2	193.602	-2.5918	0.006318	334
2016	1	17	13	30	17	1	0.00730296	-17.8	53	0	0.0801396	0.2	157.068	-2.58852	0.00730296	273.45
2016	1	17	14	0	17	1	0.00532008	-17.75	52.5	0	0.0797203	0.2	131.997	-2.58525	0.00532008	212.9
2016	1	17	14	30	17	1	0.00423144	-17.7	52	0	0.0792959	0.2	110.217	-2.58648	0.00423144	147.2
2016	1	17	15	0	17	1	0.00241561	-18.65	54.5	0	0.0766631	0.2	115.669	-2.5877	-9999	81.5
2016	1	17	15	30	17	1	0.000599789	-19.6	57	0	0.0739104	0.2	54.4895	-2.55861	0.000599789	54.6389
2016	1	17	16	0	17	-9999	0.00239195	-21.2	63.5	0	0.0716739	0.2	-14.0232	-2.52951	-9999	27.7778
2016	1	17	16	30	17	-9999	0.00055778	-22.8	70	0	0.0686368	0.2	-33.0202	-2.50615	-9999	13.8889
2016	1	17	17	0	17	-9999	0.000464547	-23.75	72.5	0	0.0653244	0.2	-38.2955	-2.48279	-9999	0
2016	1	17	17	30	17	-9999	0.000205173	-24.7	75	0	0.0620518	0.2	-30.4738	-2.46639	-9999	0
2016	1	17	18	0	17	-9999	1.18908e-05	-25.9	75.5	0	0.0560246	0.2	-28.9185	-2.45	-9999	0
2016	1	17	18	30	17	-9999	0.00038799	-27.1	76	0	0.0505188	0.2	-2.56759	-2.43484	-9999	0
2016	1	17	19	0	17	-9999	-0.00578542	-27.75	75.5	0	0.0472578	0.2	70.2257	-2.41967	-9999	0
2016	1	17	19	30	17	-9999	-0.00778077	-28.4	75	0	0.0441892	0.2	83.8171	-2.40984	-9999	0
2016	1	17	20	0	17	-9999	-0.00630667	-29.05	75	0	0.0415798	0.2	153.19	-2.4	-9999	0
2016	1	17	20	30	17	-9999	-0.00943478	-29.7	75	0	0.0391098	0.2	120.547	-2.39467	-9999	0
2016	1	17	21	0	17	-9999	-0.00929206	-30.55	73.5	0	0.0353577	0.2	141.751	-2.38934	-9999	0
2016	1	17	21	30	17	-9999	-0.00663043	-31.4	72	0	0.0319313	0.2	128.441	-2.36967	-9999	0
2016	1	17	22	0	17	-9999	-0.00523597	-31.55	72	0	0.0314742	0.2	123.792	-2.35	-9999	0
2016	1	17	22	30	17	-9999	-0.00523597	-31.7	72	0	0.0310231	0.2	123.792	-2.35	-9999	0
2016	1	17	23	0	17	-9999	-0.00221318	-32.3	71.5	0	0.0290728	0.2	129.388	-2.35	-9999	0
2016	1	17	23	30	17	-9999	-0.00243717	-32.9	71	0	0.0272346	0.2	124.773	-2.33975	-9999	0
2016	1	18	0	0	18	-9999	-0.00243717	-33.3	70.5	0	0.0260071	0.2	124.773	-2.32951	-9999	0
2016	1	18	0	30	18	-9999	-0.00362232	-33.7	70	0	0.02483	0.2	124.773	-2.31066	-0.00362232	0
2016	1	18	1	0	18	-9999	-0.00243717	-33.95	70	0	0.0242271	0.2	124.773	-2.2918	-9999	0
2016	1	18	1	30	18	-9999	-0.00303209	-34.2	70	0	0.0236375	0.2	105.584	-2.275	-9999	0
2016	1	18	2	0	18	-9999	-0.0032636	-34.35	69.5	0	0.0231237	0.2	112.902	-2.2582	-9999	0
2016	1	18	2	30	18	-9999	-0.00035142	-34.5	69	0	0.0226193	0.2	121.953	-2.25615	-9999	0
2016	1	18	3	0	18	-9999	-0.00299311	-34.75	69	0	0.0220659	0.2	16.0349	-2.2541	-0.00299311	0
2016	1	18	3	30	18	-9999	-0.00053136	-35	69	0	0.0215248	0.2	123.782	-2.26475	-0.00053136	0
2016	1	18	4	0	18	-9999	-0.00220871	-34.95	69	0	0.021632	0.2	136.641	-2.27541	-9999	0
2016	1	18	4	30	18	-9999	-0.00388606	-34.9	69	0	0.0217398	0.2	149.5	-2.2877	-0.00388606	0
2016	1	18	5	0	18	-9999	-0.00379728	-34.8	69	0	0.0219567	0.2	136.561	-2.3	-0.00379728	0
2016	1	18	5	30	18	-9999	-0.00167508	-34.7	69	0	0.0221756	0.2	256.505	-2.3	-9999	0
2016	1	18	6	0	18	-9999	0.00044712	-34.35	69.5	0	0.0231237	0.2	112.902	-2.3	0.00044712	0
2016	1	18	6	30	18	-9999	0.00728346	-34	70	0	0.0241082	0.2	105.584	-2.3	0.00728346	0
2016	1	18	7	0	18	-9999	0.00357696	-33.75	70	0	0.0247083	0.2	124.773	-2.3	0.00357696	0
2016	1	18	7	30	18	1	0.00474515	-33.5	70	0	0.0253219	0.2	517.201	-2.2832	-9999	20.9
2016	1	18	8	0	18	1	0.00591333	-32.5	71	0	0.0283149	0.2	426.077	-2.26639	-9999	41.8
2016	1	18	8	30	18	1	0.00708152	-31.5	72	0	0.0316259	0.2	489.366	-2.24467	0.00708152	70.1
2016	1	18	9	0	18	1	1.944e-05	-29.95	72.5	0	0.0369224	0.2	243.365	-2.22295	1.944e-05	98.4
2016	1	18	9	30	18	1	0.00634392	-28.4	73	0	0.0430108	0.2	241.676	-2.225	0.00634392	113.8
2016	1	18	10	0	18	1	0.0036774	-26.75	74	0	0.0508002	0.2	84.8915	-2.22705	-9999	129.2
2016	1	18	10	30	18	1	0.00101088	-25.1	75	0	0.0598493	0.2	79.4067	-2.22295	0.00101088	152.05
2016	1	18	11	0	18	1	4.25211e-05	-22.95	73	0	0.0706325	0.2	73.9219	-2.21885	-9999	174.9
2016	1	18	11	30	18	1	0.00170498	-20.8	71	0	0.0829829	0.2	68.4371	-2.225	-9999	151.05
2016	1	18	12	0	18	1	0.00159842	-20.3	70.5	0	0.086054	0.2	113.862	-2.23115	-9999	127.2
2016	1	18	12	30	18	1	0.00165573	-19.8	70	0	0.0892167	0.2	81.528	-2.24057	-9999	115.35
2016	1	18	13	0	18	1	0.00147744	-19.35	71	0	0.094064	0.2	49.194	-2.25	0.00147744	103.5
2016	1	18	13	30	18	1	0.0115927	-18.9	72	0	0.0991395	0.2	58.077	-2.25	0.0115927	84.85
2016	1	18	14	0	18	1	0.00253334	-18.7	73	0	0.102249	0.2	-9.48986	-2.25	-9999	66.2
2016	1	18	14	30	18	1	0.0026417	-18.5	74	0.1	0.105433	0.2	-9.68266	-2.25	-9999	50.15
2016	1	18	15	0	18	1	0.00255377	-18.65	73	0	0.102686	0.2	-10.0783	-2.25	-9999	34.1
2016	1	18	15	30	18	1	0.0104336	-18.8	72	0	0.0999906	0.2	3.61038	-2.25041	0.0104336	17.65
2016	1	18	16	0	18	-9999	0.00798199	-18.95	73.5	0	0.100773	0.2	-18.509	-2.25082	0.00798199	1.2
2016	1	18	16	30	18	-9999	0.00445241	-19.1	75	0	0.101517	0.2	-18.509	-2.25041	0.00445241	0.6
2016	1	18	17	0	18	-9999	0.00547645	-19.15	75	0	0.101083	0.2	-18.509	-2.25	-9999	0
2016	1	18	17	30	18	-9999	0.00650049	-19.2	75	0	0.100651	0.2	-3.32694	-2.25	0.00650049	0
2016	1	18	18	0	18	-9999	0.00183014	-19.25	74	0	0.0988837	0.2	-2.44782	-2.25	-9999	0
2016	1	18	18	30	18	-9999	0.00186334	-19.3	73	0	0.0971298	0.2	-17.1719	-2.25	-9999	0
2016	1	18	19	0	18	-9999	0.00148875	-19.5	73	0	0.0954751	0.2	-20.2479	-2.25	-9999	0
2016	1	18	19	30	18	-9999	0.00138492	-19.7	73	0.1	0.0938456	0.2	-21.0784	-2.25	-9999	0
2016	1	18	20	0	18	-9999	0.00131457	-19.65	73.5	0	0.0948962	0.2	-21.1185	-2.25	-9999	0
2016	1	18	20	30	18	-9999	0.00131457	-19.6	74	0.1	0.0959539	0.2	-21.1185	-2.25	-9999	0
2016	1	18	21	0	18	-9999	0.00125178	-19.55	74	0	0.0963676	0.2	-21.5456	-2.25	-9999	0
2016	1	18	21	30	18	-9999	0.00122043	-19.5	74	0.1	0.0967829	0.2	-21.6622	-2.25	-9999	0
2016	1	18	22	0	18	-9999	0.00110846	-19.55	74	0	0.0963676	0.2	-21.6119	-2.25	-9999	0
2016	1	18	22	30	18	-9999	0.0010397	-19.6	74	0.1	0.0959539	0.2	-21.532	-2.26475	-9999	0
2016	1	18	23	0	18	-9999	0.0010397	-19.55	74	0	0.0963676	0.2	-21.532	-2.27951	-9999	0
2016	1	18	23	30	18	-9999	0.00106675	-19.5	74	0.1	0.0967829	0.2	-21.6468	-2.27664	-9999	0
2016	1	19	0	0	19	-9999	0.00109535	-19.45	75.5	0	0.0991701	0.2	-21.0138	-2.27377	-9999	0
2016	1	19	0	30	19	-9999	0.00115519	-19.4	77	0.4	0.101576	0.2	-20.0833	-2.28689	-9999	0.025
2016	1	19	1	0	19	-9999	0.00112772	-19.3	76.5	0	0.101787	0.2	-19.9979	-2.3	-9999	0.05
2016	1	19	1	30	19	-9999	0.00112074	-19.2	76	0	0.101993	0.2	-20.3892	-2.3	-9999	0.075
2016	1	19	2	0	19	-9999	0.00107939	-19.05	76	0	0.103312	0.2	-20.2169	-2.3	-9999	0.1
2016	1	19	2	30	19	-9999	0.00107861	-18.9	76	0	0.104647	0.2	-20.3598	-2.30164	-9999	0.05
2016	1	19	3	0	19	-9999	0.00111743	-18.95	77	0	0.105572	0.2	-20.3598	-2.30328	-9999	0
2016	1	19	3	30	19	-9999	0.00107939	-19	78	0.2	0.106486	0.2	-20.2169	-2.31926	-9999	0
2016	1	19	4	0	19	-9999	0.00107939	-19	77.5	0	0.105803	0.2	-20.2169	-2.33525	-9999	0
2016	1	19	4	30	19	-9999	0.00107939	-19	77	0.1	0.105121	0.2	-20.2169	-2.34262	-9999	0
2016	1	19	5	0	19	-9999	0.00107939	-19	76	0	0.103756	0.2	-20.2169	-2.35	-9999	0
2016	1	19	5	30	19	-9999	0.00107939	-19	75	0	0.10239	0.2	-20.3825	-2.35	-9999	0
2016	1	19	6	0	19	-9999	0.00111743	-18.95	75	0	0.10283	0.2	-20.5259	-2.35	-9999	0
2016	1	19	6	30	19	-9999	0.00107861	-18.9	75	0	0.10327	0.2	-20.7236	-2.35	-9999	0.15
2016	1	19	7	0	19	-9999	0.00107861	-18.9	75	0	0.10327	0.2	-20.7236	-2.35	-9999	0.3
2016	1	19	7	30	19	1	0.00107861	-18.9	75	0.3	0.10327	0.2	-20.7236	-2.35164	-9999	14.1
2016	1	19	8	0	19	1	0.00127783	-18.65	74.5	0	0.104796	0.2	-18.6627	-2.35328	-9999	27.9
2016	1	19	8	30	19	1	0.00181791	-18.4	74	0.1	0.106335	0.2	-11.6161	-2.3627	-9999	56.6
2016	1	19	9	0	19	1	0.0024937	-18	73	0	0.108525	0.2	-12.9953	-2.37213	-9999	85.3
2016	1	19	9	30	19	1	0.00294956	-17.6	72	0	0.110727	0.2	-10.2465	-2.35861	-9999	97.1
2016	1	19	10	0	19	1	0.00346917	-17.25	70.5	0	0.111671	0.2	-8.80715	-2.34508	-9999	108.9
2016	1	19	10	30	19	1	0.00350146	-16.9	69	0	0.112561	0.2	-9.03827	-2.34877	-9999	191.55
2016	1	19	11	0	19	1	0.00341922	-16.35	67	0	0.114454	0.2	-12.1122	-2.35246	-9999	274.2
2016	1	19	11	30	19	1	0.0029126	-15.8	65	0	0.116249	0.2	-18.0821	-2.34918	-9999	276.2
2016	1	19	12	0	19	1	0.00821664	-15.75	67	0	0.120325	0.2	18.8803	-2.3459	0.00821664	278.2
2016	1	19	12	30	19	1	0.0259077	-15.7	69	0	0.124433	0.2	74.4035	-2.34467	0.0259077	220.4
2016	1	19	13	0	19	1	0.0213721	-15.35	70.5	0	0.130885	0.2	128.809	-2.34344	0.0213721	162.6
2016	1	19	13	30	19	1	0.0271702	-15	72	0	0.137596	0.2	38.2306	-2.34672	0.0271702	135.9
2016	1	19	14	0	19	1	0.0043034	-15.1	69.5	0	0.131726	0.2	20.5757	-2.35	0.0043034	109.2
2016	1	19	14	30	19	1	0.0008748	-15.2	67	0	0.125941	0.2	2.92076	-2.34918	0.0008748	79
2016	1	19	15	0	19	1	0.0134667	-15.55	71.5	0	0.130558	0.2	-16.3511	-2.34836	0.0134667	48.8
2016	1	19	15	30	19	1	0.00294644	-15.9	76	0	0.134795	0.2	-17.0107	-2.33443	-9999	25.15
2016	1	19	16	0	19	-9999	0.00302577	-16.1	76.5	0	0.133439	0.2	-19.7889	-2.32049	-9999	1.5
2016	1	19	16	30	19	-9999	0.00311195	-16.3	77	0.1	0.132087	0.2	-18.303	-2.31025	-9999	0.75
2016	1	19	17	0	19	-9999	0.00365272	-16.65	77	0	0.128275	0.2	-14.2217	-2.3	-9999	0
2016	1	19	17	30	19	-9999	0.00347747	-17	77	0.2	0.12456	0.2	-11.605	-2.29508	-9999	0
2016	1	19	18	0	19	-9999	0.00331008	-17.35	76.5	0	0.120157	0.2	-14.7553	-2.29016	-9999	0
2016	1	19	18	30	19	-9999	0.00303209	-17.7	76	0.1	0.115894	0.2	-15.2488	-2.27008	-9999	0
2016	1	19	19	0	19	-9999	0.00305906	-17.75	76.5	0	0.116164	0.2	-14.8491	-2.25	-9999	0
2016	1	19	19	30	19	-9999	0.00292258	-17.8	77	0.1	0.116429	0.2	-16.129	-2.25	-9999	0
2016	1	19	20	0	19	-9999	0.0021672	-18.1	76	0	0.112031	0.2	-16.9608	-2.25	-9999	0
2016	1	19	20	30	19	-9999	0.0014101	-18.4	75	0	0.107772	0.2	-17.8984	-2.25	-9999	0
2016	1	19	21	0	19	-9999	0.00117737	-18.75	76	0	0.105997	0.2	-19.8789	-2.25	-9999	0
2016	1	19	21	30	19	-9999	0.00111691	-19.1	77	0	0.104224	0.2	-20.8624	-2.25	-9999	0
2016	1	19	22	0	19	-9999	0.00121481	-19.3	77	0	0.102452	0.2	-20.3764	-2.25	-9999	0
2016	1	19	22	30	19	-9999	0.000986355	-19.5	77	0	0.100707	0.2	-22.1378	-2.24303	-9999	0
2016	1	19	23	0	19	-9999	0.00086259	-19.55	77	0	0.100274	0.2	-21.4435	-2.23607	-9999	0
2016	1	19	23	30	19	-9999	0.00086259	-19.6	77	0	0.0998439	0.2	-21.4435	-2.24098	-9999	0
2016	1	20	0	0	20	-9999	0.00086259	-19.75	77	0	0.0985623	0.2	-21.7702	-2.2459	-9999	0
2016	1	20	0	30	20	-9999	0.000804197	-19.9	77	0	0.0972954	0.2	-21.067	-2.24139	-9999	0
2016	1	20	1	0	20	-9999	0.000716773	-20	76.5	0	0.0958326	0.2	-21.7323	-2.23689	-9999	0
2016	1	20	1	30	20	-9999	0.000810894	-20.1	76	0	0.094387	0.2	-21.6707	-2.24098	-9999	0
2016	1	20	2	0	20	-9999	0.000914298	-20.3	77	0	0.093988	0.2	-21.685	-2.24508	-9999	0
2016	1	20	2	30	20	-9999	0.000862181	-20.5	78	0	0.093572	0.2	-21.6554	-2.225	-9999	0
2016	1	20	3	0	20	-9999	0.00102441	-21.25	78	0	0.0876567	0.2	-21.7628	-2.20492	-9999	0
2016	1	20	3	30	20	-9999	0.000244086	-22	78	0	0.0820785	0.2	-28.4735	-2.21393	-9999	0
2016	1	20	4	0	20	-9999	0.000291786	-22.65	78	0	0.0775037	0.2	-30.7289	-2.22295	-9999	0
2016	1	20	4	30	20	-9999	3.72544e-05	-23.3	78	0	0.0731587	0.2	-37.8008	-2.21148	-9999	0
2016	1	20	5	0	20	-9999	4.79388e-05	-23.6	78	0	0.0712281	0.2	-36.6014	-2.2	-9999	0
2016	1	20	5	30	20	-9999	3.32085e-05	-23.9	78	0	0.0693433	0.2	-35.5547	-2.20656	-9999	0
2016	1	20	6	0	20	-9999	-0.000312126	-24.2	77	0	0.0666379	0.2	-36.6537	-2.21311	-9999	0
2016	1	20	6	30	20	-9999	-7.9104e-05	-24.5	76	0	0.0640224	0.2	-32.4814	-2.21066	-9999	0
2016	1	20	7	0	20	-9999	-7.9104e-05	-24.5	77	0	0.0648648	0.2	-32.4814	-2.2082	-9999	0
2016	1	20	7	30	20	1	-7.9104e-05	-24.5	78	0	0.0657072	0.2	-32.4814	-2.2041	-9999	33.05
2016	1	20	8	0	20	1	-0.000141066	-23.35	76	0	0.0709662	0.2	-38.3916	-2.2	-9999	66.1
2016	1	20	8	30	20	1	0.00073974	-22.2	74	0	0.07651	0.2	-28.5819	-2.21066	-9999	155.7
2016	1	20	9	0	20	1	0.0101879	-21.05	72	0	0.0823388	0.2	42.0443	-2.22131	-9999	245.3
2016	1	20	9	30	20	1	0.00873445	-19.9	70	0	0.0884504	0.2	56.4483	-2.23484	-9999	269.6
2016	1	20	10	0	20	1	0.0132591	-19.45	68	0	0.0893188	0.2	90.854	-2.24836	0.0132591	293.9
2016	1	20	10	30	20	1	-0.0102345	-19	66	0	0.0901036	0.2	130.99	-2.24754	-0.0102345	282.2
2016	1	20	11	0	20	1	0.0199037	-18.4	65.5	0	0.0941208	0.2	89.7661	-2.24672	0.0199037	270.5
2016	1	20	11	30	20	1	0.0227333	-17.8	65	0	0.0982844	0.2	81.0459	-2.24836	0.0227333	287.9
2016	1	20	12	0	20	1	0.0305228	-17.45	63	0	0.0981215	0.2	174.359	-2.25	0.0305228	305.3
2016	1	20	12	30	20	1	0.0426116	-17.1	61	0	0.0978511	0.2	222.921	-2.25	0.0426116	222.9
2016	1	20	13	0	20	1	0.0291889	-16.7	59.5	0	0.0987066	0.2	161.903	-2.25	0.0291889	140.5
2016	1	20	13	30	20	1	0.0181014	-16.3	58	0	0.0994944	0.2	107.21	-2.25369	0.0181014	107.8
2016	1	20	14	0	20	1	0.0111118	-16.3	57.5	0	0.0986367	0.2	86.1964	-2.25738	0.0111118	75.1
2016	1	20	14	30	20	1	0.0113646	-16.3	57	0	0.097779	0.2	52.7709	-2.2832	0.0113646	57
2016	1	20	15	0	20	1	0.0114112	-17.1	59.5	0	0.0954449	0.2	19.7761	-2.30902	0.0114112	38.9
2016	1	20	15	30	20	1	0.00586375	-17.9	62	0	0.0929573	0.2	-0.273134	-2.30492	0.00586375	20.45
2016	1	20	16	0	20	-9999	0.00149688	-18.85	67	0	0.0926501	0.2	-21.9401	-2.30082	0.00149688	2
2016	1	20	16	30	20	-9999	0.000732849	-19.8	72	0	0.0917657	0.2	-22.641	-2.30041	-9999	1
2016	1	20	17	0	20	-9999	0.00116696	-20.9	74	0	0.0857396	0.2	-22.9196	-2.3	-9999	0
2016	1	20	17	30	20	-9999	0.000373027	-22	76	0	0.0799739	0.2	-29.3864	-2.30164	-9999	0
2016	1	20	18	0	20	-9999	-0.000184528	-22.7	77.5	0	0.0766668	0.2	-32.0208	-2.30328	-9999	0
2016	1	20	18	30	20	-9999	-9.18396e-05	-23.4	79	0	0.0734397	0.2	-37.7611	-2.32131	-9999	0
2016	1	20	19	0	20	-9999	-0.000117806	-24.35	77.5	0	0.0661729	0.2	-34.5811	-2.33934	-9999	0
2016	1	20	19	30	20	-9999	-8.868e-05	-25.3	76	0	0.0595582	0.2	-32.0428	-2.34016	-9999	0
2016	1	20	20	0	20	-9999	-7.9104e-05	-24.55	77	0	0.0645735	0.2	-32.4814	-2.34098	-9999	0
2016	1	20	20	30	20	-9999	4.23274e-05	-23.8	78	0	0.0699665	0.2	-36.9815	-2.34713	-9999	0
2016	1	20	21	0	20	-9999	-0.000312126	-24.1	77.5	0	0.0676751	0.2	-36.6537	-2.35328	-9999	0
2016	1	20	21	30	20	-9999	-9.33351e-05	-24.4	77	0	0.0654511	0.2	-34.0219	-2.35451	-9999	0
2016	1	20	22	0	20	-9999	-9.33351e-05	-24.4	76	0	0.0646011	0.2	-33.0689	-2.35574	-9999	0
2016	1	20	22	30	20	-9999	-9.33351e-05	-24.4	75	0	0.0637511	0.2	-33.0689	-2.36967	-9999	0
2016	1	20	23	0	20	-9999	-0.000159362	-24.75	75.5	0	0.0621843	0.2	-31.1211	-2.38361	-9999	0
2016	1	20	23	30	20	-9999	-8.868e-05	-25.1	76	0	0.0606472	0.2	-30.5264	-2.3918	-9999	0
2016	1	21	0	0	21	-9999	-8.868e-05	-25.45	76	0	0.058753	0.2	-30.5264	-2.4	-9999	0
2016	1	21	0	30	21	-9999	-0.000296305	-25.8	76	0	0.056912	0.2	-29.1625	-2.4	-9999	0
2016	1	21	1	0	21	-9999	-0.000153881	-26.7	75	0	0.0517238	0.2	-10.627	-2.4	-9999	0
2016	1	21	1	30	21	-9999	-0.00421847	-27.6	74	0	0.0469676	0.2	33.8993	-2.4	-9999	0
2016	1	21	2	0	21	-9999	-0.00778077	-28.55	73.5	0	0.0427028	0.2	83.8171	-2.4	-9999	0
2016	1	21	2	30	21	-9999	-0.00943478	-29.5	73	0	0.0387926	0.2	129.704	-2.40082	-9999	0
2016	1	21	3	0	21	-9999	-0.00929206	-30.25	72.5	0	0.0358864	0.2	141.751	-2.40164	-9999	0
2016	1	21	3	30	21	-9999	-0.0100496	-31	72	0	0.0331795	0.2	123.017	-2.42582	-9999	0
2016	1	21	4	0	21	-9999	-0.00523597	-31.75	72	0	0.030874	0.2	123.792	-2.45	-9999	0
2016	1	21	4	30	21	-9999	-0.00255628	-32.5	72	0	0.0287137	0.2	124.825	-2.45	-9999	0
2016	1	21	5	0	21	-9999	-0.00243717	-32.95	71	0	0.0271022	0.2	124.773	-2.45	-9999	0
2016	1	21	5	30	21	-9999	-0.00243717	-33.4	70	0	0.0255712	0.2	124.773	-2.45	-9999	0
2016	1	21	6	0	21	-9999	-0.00243717	-33.6	70.5	0	0.025254	0.2	124.773	-2.45	-9999	0
2016	1	21	6	30	21	-9999	-0.00243717	-33.8	71	0	0.0249385	0.2	124.773	-2.47049	-9999	0.15
2016	1	21	7	0	21	1	-0.00267555	-33.65	71.5	0	0.0254868	0.2	131.236	-2.49098	-9999	0.3
2016	1	21	7	30	21	1	-0.00238511	-33.5	72	0	0.0260454	0.2	117.192	-2.49549	-9999	52.1
2016	1	21	8	0	21	1	-0.00401769	-31.95	72	0	0.030284	0.2	111.45	-2.5	-9999	103.9
2016	1	21	8	30	21	1	-0.01047	-30.4	72	0	0.0351343	0.2	46.0098	-2.5	-9999	226.35
2016	1	21	9	0	21	1	0.00612874	-27.75	72.5	0	0.04538	0.2	139.945	-2.5	-9999	348.8
2016	1	21	9	30	21	1	0.0144045	-25.1	73	0	0.0582533	0.2	24.4855	-2.49918	0.0144045	390.4
2016	1	21	10	0	21	1	0.0192364	-23.2	67.5	0	0.0638763	0.2	47.6176	-2.49836	0.0192364	432
2016	1	21	10	30	21	1	0.0124595	-21.3	62	0	0.069372	0.2	107.912	-2.51475	-9999	482.9
2016	1	21	11	0	21	1	0.0116391	-20.5	61.5	0	0.0737779	0.2	133.508	-2.53115	-9999	533.8
2016	1	21	11	30	21	1	0.0112587	-19.7	61	0	0.0784189	0.2	159.104	-2.53852	-9999	519.6
2016	1	21	12	0	21	1	0.040151	-18.9	57.5	0	0.0791739	0.2	121.503	-2.5459	0.040151	505.4
2016	1	21	12	30	21	1	0.0225069	-18.1	54	0	0.0796006	0.2	104.914	-2.54795	0.0225069	388.55
2016	1	21	13	0	21	1	0.0241861	-16.95	51	0	0.0828485	0.2	105.151	-2.55	0.0241861	271.7
2016	1	21	13	30	21	1	0.021864	-15.8	48	0	0.0858452	0.2	86.4179	-2.55	0.021864	183.75
2016	1	21	14	0	21	1	0.029845	-16.4	47.5	0	0.0808042	0.2	144.086	-2.55	0.029845	95.8
2016	1	21	14	30	21	1	0.0149591	-17	47	0	0.0760303	0.2	44.4717	-2.5623	0.0149591	68.35
2016	1	21	15	0	21	1	0.0171667	-18.15	50	0	0.073392	0.2	79.9632	-2.57459	0.0171667	40.9
2016	1	21	15	30	21	1	0.0113586	-19.3	53	0	0.0705189	0.2	26.9966	-2.59016	0.0113586	21.45
2016	1	21	16	0	21	-9999	0.00564647	-20.35	56.5	0	0.0686671	0.2	-41.0315	-2.60574	0.00564647	2
2016	1	21	16	30	21	-9999	0.0029808	-21.4	60	0	0.0665497	0.2	-36.5241	-2.60287	0.0029808	1
2016	1	21	17	0	21	-9999	0.00268466	-23.1	66	0	0.0630146	0.2	-32.0168	-2.6	0.00268466	0
2016	1	21	17	30	21	-9999	-0.000159362	-24.8	72	0	0.0590346	0.2	-30.7564	-2.6	-9999	0
2016	1	21	18	0	21	-9999	-0.000296305	-25.75	73	0	0.054915	0.2	-29.1155	-2.6	-9999	0
2016	1	21	18	30	21	-9999	-0.000153881	-26.7	74	0	0.0510342	0.2	-10.627	-2.6	-9999	0
2016	1	21	19	0	21	-9999	-0.00337079	-27.55	74	0	0.0471857	0.2	22.3271	-2.6	-9999	0
2016	1	21	19	30	21	-9999	-0.00644949	-28.4	74	0	0.0436	0.2	74.6838	-2.6	-9999	0
2016	1	21	20	0	21	-9999	-0.00665135	-28.95	74.5	0	0.0416922	0.2	69.91	-2.6	-9999	0
2016	1	21	20	30	21	-9999	-0.00767715	-29.5	75	0	0.0398554	0.2	108.934	-2.6	-9999	0
2016	1	21	21	0	21	-9999	-0.00756297	-30.3	74.5	0	0.0367016	0.2	124.848	-2.6	-9999	0
2016	1	21	21	30	21	-9999	-0.00736172	-31.1	74	0	0.0337763	0.2	123.194	-2.6	-9999	0
2016	1	21	22	0	21	-9999	-0.0057756	-31.5	73.5	0	0.0322848	0.2	116.297	-2.6	-9999	0
2016	1	21	22	30	21	-9999	-0.00436175	-31.9	73	0	0.0308532	0.2	112.581	-2.60287	-9999	0
2016	1	21	23	0	21	-9999	-0.00212712	-32.4	72.5	0	0.029195	0.2	119.377	-2.60574	-9999	0
2016	1	21	23	30	21	-9999	-0.00224869	-32.9	72	0	0.0276182	0.2	115.117	-2.60287	-9999	0
2016	1	22	0	0	22	-9999	-0.00238511	-33.5	71	0	0.0256837	0.2	120.336	-2.6	-9999	0
2016	1	22	0	30	22	-9999	-0.00303209	-34.1	70	0	0.0238718	0.2	108.432	-2.61025	-9999	0
2016	1	22	1	0	22	-9999	-0.00035142	-34.55	69.5	0	0.0226707	0.2	121.953	-2.62049	-9999	0
2016	1	22	1	30	22	-9999	-0.00035142	-35	69	0	0.0215248	0.2	109.601	-2.63279	-9999	0
2016	1	22	2	0	22	-9999	-0.000281993	-35.4	69	0	0.0206838	0.2	120.682	-2.64508	-9999	0
2016	1	22	2	30	22	-9999	-0.000333431	-35.8	69	0	0.0198726	0.2	131.064	-2.65779	-9999	0
2016	1	22	3	0	22	-9999	-0.000281993	-35.75	69.5	0	0.0201172	0.2	120.682	-2.67049	-9999	0
2016	1	22	3	30	22	-9999	-0.000281993	-35.7	70	0	0.0203636	0.2	120.682	-2.68525	-9999	0
2016	1	22	4	0	22	-9999	-0.000541654	-36.25	69	0	0.0189944	0.2	105.392	-2.7	-9999	0
2016	1	22	4	30	22	-9999	-0.00215214	-36.8	68	0	0.0177084	0.2	136.477	-2.70082	-9999	0
2016	1	22	5	0	22	-9999	-0.00215214	-36.85	68	0	0.017619	0.2	136.477	-2.70164	-9999	0
2016	1	22	5	30	22	-9999	-0.00280195	-36.9	68	0	0.01753	0.2	136.477	-2.70246	-9999	0
2016	1	22	6	0	22	-9999	-0.00280195	-37	68	0	0.0173532	0.2	136.477	-2.70328	-9999	0
2016	1	22	6	30	22	-9999	-0.00280195	-37.1	68	0	0.017178	0.2	136.477	-2.70738	-9999	0.2
2016	1	22	7	0	22	1	-0.00280195	-36.85	68.5	0	0.0177485	0.2	136.477	-2.71148	-9999	0.4
2016	1	22	7	30	22	1	-0.00215214	-36.6	69	0	0.0183358	0.2	136.477	-2.70861	-9999	26.3
2016	1	22	8	0	22	1	-0.00032884	-34.75	70	0	0.0223857	0.2	138.3	-2.70574	-9999	52.2
2016	1	22	8	30	22	1	-3.672e-05	-32.9	71	0	0.0272346	0.2	22.1475	-2.72049	-9999	172.25
2016	1	22	9	0	22	1	3.4182e-05	-30.15	72	0	0.0359789	0.2	53.6768	-2.73525	-9999	292.3
2016	1	22	9	30	22	1	0.0174343	-27.4	73	0	0.0471987	0.2	38.7782	-2.73811	0.0174343	367.1
2016	1	22	10	0	22	1	0.00366768	-25.1	66	0	0.0526673	0.2	42.2077	-2.74098	0.00366768	441.9
2016	1	22	10	30	22	1	0.0176692	-22.8	59	0	0.057851	0.2	231.964	-2.75041	0.0176692	490.9
2016	1	22	11	0	22	1	0.00890274	-21.45	53.5	0	0.0590811	0.2	161.065	-2.75984	0.00890274	539.9
2016	1	22	11	30	22	1	0.0144548	-20.1	48	0	0.0596128	0.2	220.529	-2.77746	0.0144548	452.75
2016	1	22	12	0	22	1	0.0219066	-19.75	48.5	0	0.0620814	0.2	322.268	-2.79508	0.0219066	365.6
2016	1	22	12	30	22	1	0.014748	-19.4	49	0	0.0646392	0.2	215.314	-2.79754	0.014748	308
2016	1	22	13	0	22	1	0.0212131	-19.5	50	0	0.0653939	0.2	236.846	-2.8	0.0212131	250.4
2016	1	22	13	30	22	1	0.00881413	-19.6	51	0	0.0661304	0.2	37.8025	-2.8	0.00881413	178.45
2016	1	22	14	0	22	1	0.00871537	-19.65	52.5	0	0.067783	0.2	38.6814	-2.8	0.00871537	106.5
2016	1	22	14	30	22	1	0.00871298	-19.7	54	0	0.06942	0.2	23.6987	-2.81107	0.00871298	81.9
2016	1	22	15	0	22	1	0.00384588	-20.1	56	0	0.0695483	0.2	12.8601	-2.82213	0.00384588	57.3
2016	1	22	15	30	22	1	0.0043267	-20.5	58	0	0.0695792	0.2	2.02151	-2.8373	0.0043267	33.1
2016	1	22	16	0	22	-9999	0.00318816	-21.55	62.5	0	0.0684182	0.2	-30.5681	-2.85246	0.00318816	8.9
2016	1	22	16	30	22	-9999	-0.000286119	-22.6	67	0	0.0668688	0.2	-31.5587	-2.85164	-9999	4.45
2016	1	22	17	0	22	-9999	-0.000644733	-23.15	70.5	0	0.0670126	0.2	-35.4789	-2.85082	-9999	0
2016	1	22	17	30	22	-9999	7.21965e-05	-23.7	74	0	0.0669745	0.2	-36.5911	-2.85041	-9999	0
2016	1	22	18	0	22	-9999	-0.000172692	-24.05	73.5	0	0.0644706	0.2	-36.2602	-2.85	-9999	0
2016	1	22	18	30	22	-9999	1.296e-05	-24.4	73	0	0.062051	0.2	-27.1028	-2.85	1.296e-05	0
2016	1	22	19	0	22	-9999	0.0034344	-24.5	74	0	0.0623376	0.2	-22.7108	-2.85	0.0034344	0
2016	1	22	19	30	22	-9999	-0.00011016	-24.6	75	0	0.0626136	0.2	-18.3187	-2.85	-0.00011016	0
2016	1	22	20	0	22	-9999	0.000677808	-24.4	73	0	0.062051	0.2	-11.11	-2.85	0.000677808	0
2016	1	22	20	30	22	-9999	0.00112428	-24.2	71	0	0.0614453	0.2	-29.5068	-2.85	0.00112428	0
2016	1	22	21	0	22	-9999	0.0018144	-24.2	70.5	0	0.0610126	0.2	-22.0294	-2.85	0.0018144	0
2016	1	22	21	30	22	-9999	0.00305856	-24.2	70	0	0.0605799	0.2	-26.3992	-2.85	0.00305856	0
2016	1	22	22	0	22	-9999	2.8512e-05	-24.6	71	0	0.0592742	0.2	-32.5818	-2.85	-9999	0
2016	1	22	22	30	22	-9999	1.8936e-05	-25	72	0	0.0579775	0.2	-32.3801	-2.85	-9999	0
2016	1	22	23	0	22	-9999	1.8936e-05	-25.25	72	0	0.0566799	0.2	-32.3801	-2.85	-9999	0
2016	1	22	23	30	22	-9999	-2.67674e-05	-25.5	72	0	0.0554085	0.2	-30.9997	-2.85	-9999	0
2016	1	23	0	0	23	-9999	-0.000153881	-26.7	73.5	0	0.0506894	0.2	-10.324	-2.85	-9999	0
2016	1	23	0	30	23	-9999	4.63783e-05	-27.9	75	0	0.0462956	0.2	43.5901	-2.85041	-9999	0
2016	1	23	1	0	23	-9999	0.000661315	-28.65	74.5	0	0.0428808	0.2	71.4292	-2.85082	-9999	0
2016	1	23	1	30	23	-9999	0.00128487	-29.4	74	0	0.0396965	0.2	121.659	-2.86066	-9999	0
2016	1	23	2	0	23	-9999	0.00150519	-29.85	73.5	0	0.0377878	0.2	127.146	-2.87049	-9999	0
2016	1	23	2	30	23	-9999	0.00120633	-30.3	73	0	0.0359626	0.2	143.096	-2.875	-9999	0
2016	1	23	3	0	23	-9999	0.00120633	-30.65	73.5	0	0.0350223	0.2	143.096	-2.87951	-9999	0
2016	1	23	3	30	23	-9999	0.000406851	-31	74	0	0.0341011	0.2	109.169	-2.90656	-9999	0
2016	1	23	4	0	23	-9999	0.000288298	-31.45	73.5	0	0.0324403	0.2	116.403	-2.93361	-9999	0
2016	1	23	4	30	23	-9999	0.000709121	-31.9	73	0	0.0308532	0.2	116.403	-2.93443	-9999	0
2016	1	23	5	0	23	-9999	0.000709121	-32.25	71.5	0	0.0292139	0.2	125.159	-2.93525	-9999	0
2016	1	23	5	30	23	-9999	4.13901e-05	-32.6	70	0	0.0276463	0.2	115.003	-2.96475	-9999	0
2016	1	23	6	0	23	-9999	4.13901e-05	-32.95	70.5	0	0.0269114	0.2	115.003	-2.99426	-9999	0
2016	1	23	6	30	23	-9999	3.2679e-05	-33.3	71	0	0.0261916	0.2	120.795	-2.99467	-9999	0.3
2016	1	23	7	0	23	1	3.91129e-05	-32.75	72	0	0.0280245	0.2	124.363	-2.99508	-9999	0.6
2016	1	23	7	30	23	1	0.000709121	-32.2	73	0	0.0299715	0.2	116.403	-2.975	-9999	47.15
2016	1	23	8	0	23	1	0.00126882	-30.3	73	0	0.0359626	0.2	146.774	-2.95492	-9999	93.7
2016	1	23	8	30	23	1	0.003085	-28.4	73	0	0.0430108	0.2	43.1825	-2.96885	-9999	204
2016	1	23	9	0	23	1	0.000574128	-26.55	69	0	0.0482458	0.2	39.6326	-2.98279	0.000574128	314.3
2016	1	23	9	30	23	1	0.000364824	-24.7	65	0	0.0537782	0.2	61.411	-3.00738	-9999	359.85
2016	1	23	10	0	23	1	0.00015552	-23.45	62.5	0	0.0578427	0.2	135.678	-3.03197	0.00015552	405.4
2016	1	23	10	30	23	1	0.00896832	-22.2	60	0	0.0620352	0.2	209.946	-3.03197	0.00896832	424.3
2016	1	23	11	0	23	1	0.00734832	-21.45	58	0	0.0640505	0.2	126.195	-3.03197	0.00734832	443.2
2016	1	23	11	30	23	1	0.0150113	-20.7	56	0	0.066023	0.2	190.201	-3.03811	0.0150113	423.2
2016	1	23	12	0	23	1	0.0100546	-20.15	54.5	0	0.0673934	0.2	187.819	-3.04426	0.0100546	403.2
2016	1	23	12	30	23	1	0.00970056	-19.6	53	0	0.0687237	0.2	111.01	-3.05984	0.00970056	354.25
2016	1	23	13	0	23	1	0.0117079	-18.8	52	0	0.0722155	0.2	86.3896	-3.07541	0.0117079	305.3
2016	1	23	13	30	23	1	0.0193088	-18	51	0	0.0758192	0.2	149.349	-3.0877	0.0193088	236.3
2016	1	23	14	0	23	1	0.015504	-17.7	50	0	0.0762461	0.2	68.1296	-3.1	0.015504	167.3
2016	1	23	14	30	23	1	0.0122984	-17.4	49	0	0.0766395	0.2	65.5305	-3.10041	0.0122984	120.45
2016	1	23	15	0	23	1	0.0126979	-18	51.5	0	0.0765625	0.2	58.1556	-3.10082	0.0126979	73.6
2016	1	23	15	30	23	1	0.00690209	-18.6	54	0	0.0762845	0.2	11.1181	-3.11885	0.00690209	39.05
2016	1	23	16	0	23	-9999	0.00512843	-19.6	57.5	0	0.0745587	0.2	-10.7122	-3.13689	-9999	4.5
2016	1	23	16	30	23	-9999	0.00335478	-20.6	61	0	0.0725456	0.2	-32.5424	-3.12664	-9999	2.25
2016	1	23	17	0	23	-9999	0.00158112	-21.9	66	0	0.0700644	0.2	-54.3727	-3.11639	0.00158112	0
2016	1	23	17	30	23	-9999	0.00211248	-23.2	71	0	0.0671884	0.2	-59.1006	-3.1082	0.00211248	0
2016	1	23	18	0	23	-9999	0.00358344	-24.15	73	0	0.0634603	0.2	-62.4327	-3.1	0.00358344	0
2016	1	23	18	30	23	-9999	0.00157205	-25.1	75	0	0.0598493	0.2	-32.1485	-3.1	0.00157205	0
2016	1	23	19	0	23	-9999	-3.564e-05	-25.15	77	0	0.0611677	0.2	-34.1526	-3.1	-9999	0
2016	1	23	19	30	23	-9999	-3.78766e-05	-25.2	79	0	0.0624729	0.2	-32.9034	-3.0959	-9999	0
2016	1	23	20	0	23	-9999	-0.000241244	-24.15	74	0	0.0643296	0.2	-35.1474	-3.0918	-9999	0
2016	1	23	20	30	23	-9999	-0.000448815	-23.1	69	0	0.0658789	0.2	-34.4334	-3.08197	-9999	0
2016	1	23	21	0	23	-9999	-0.00044806	-23.15	68.5	0	0.0651115	0.2	-33.652	-3.07213	-9999	0
2016	1	23	21	30	23	-9999	-0.000381213	-23.2	68	0	0.0643495	0.2	-33.097	-3.06803	-9999	0
2016	1	23	22	0	23	-9999	0.000330143	-23.65	69	0	0.0627288	0.2	-34.6734	-3.06393	-9999	0
2016	1	23	22	30	23	-9999	-4.94702e-05	-24.1	70	0	0.0611259	0.2	-33.454	-3.05697	-9999	0
2016	1	23	23	0	23	-9999	7.10051e-05	-24.3	70	0	0.0600383	0.2	-30.7029	-3.05	-9999	0
2016	1	23	23	30	23	-9999	-0.0027864	-24.5	70	0	0.058968	0.2	-41.6537	-3.05697	-0.0027864	0
2016	1	24	0	0	24	-9999	0.000227515	-24.75	70.5	0	0.0580662	0.2	-28.604	-3.06393	-9999	0
2016	1	24	0	30	24	-9999	0.000405075	-25	71	0	0.0571722	0.2	-27.8852	-3.08197	-9999	0
2016	1	24	1	0	24	-9999	0.00048867	-25.35	72	0	0.0561682	0.2	-27.9952	-3.1	-9999	0
2016	1	24	1	30	24	-9999	0.000360839	-25.7	73	0	0.0551655	0.2	-23.4447	-2.96141	-9999	0
2016	1	24	2	0	24	-9999	0.000583819	-25.95	73.5	0	0.0542923	0.2	-11.6338	-2.82281	-9999	0
2016	1	24	2	30	24	-9999	0.000648741	-26.2	74	0	0.0534276	0.2	-8.26248	-2.83142	-9999	0
2016	1	24	3	0	24	-9999	0.000254772	-27.05	75	0	0.0500844	0.2	6.91258	-2.84003	-9999	0
2016	1	24	3	30	24	-9999	0.000270957	-27.9	76	0	0.0469129	0.2	44.0251	-2.84952	-9999	0
2016	1	24	4	0	24	-9999	0.000183384	-27.55	74	0	0.0471857	0.2	32.5807	-2.85902	-9999	0
2016	1	24	4	30	24	-9999	0.000361519	-27.2	72	0	0.0474204	0.2	13.5342	-2.86332	-9999	0
2016	1	24	5	0	24	-9999	0.000172073	-27.45	73.5	0	0.0473027	0.2	9.80755	-2.86762	-9999	0
2016	1	24	5	30	24	-9999	-6.2856e-05	-27.7	75	0	0.0471631	0.2	38.4652	-2.8709	-9999	0
2016	1	24	6	0	24	-9999	-6.2856e-05	-27.6	75	0	0.0476023	0.2	38.4652	-2.87418	-9999	0
2016	1	24	6	30	24	-9999	0.000183384	-27.5	75	0	0.0480452	0.2	32.5807	-2.8804	-9999	0.5
2016	1	24	7	0	24	1	0.000278042	-26.9	73.5	0	0.0497656	0.2	-3.09666	-2.88661	-9999	1
2016	1	24	7	30	24	1	-0.000289008	-26.3	72	0	0.0515101	0.2	3.75771	-2.87876	-0.000289008	74.05
2016	1	24	8	0	24	1	9.072e-05	-25.4	70	0	0.0543608	0.2	55.9496	-2.8709	9.072e-05	147.1
2016	1	24	8	30	24	1	-0.00091368	-24.5	68	0	0.0572832	0.2	108.142	-2.87746	-0.00091368	220.8
2016	1	24	9	0	24	1	-0.00059292	-23.65	66	0	0.0600015	0.2	160.333	-2.88402	-9999	294.5
2016	1	24	9	30	24	1	-0.00027216	-22.8	64	0	0.0627536	0.2	116.453	-2.89023	-0.00027216	330.2
2016	1	24	10	0	24	1	0.00568944	-21.9	62	0	0.0658181	0.2	73.1157	-2.89645	0.00568944	365.9
2016	1	24	10	30	24	1	0.0009635	-21	60	0	0.0689155	0.2	141.39	-2.8998	-9999	411.85
2016	1	24	11	0	24	1	-0.00376244	-20.1	58	0	0.0720322	0.2	106.284	-2.90314	-0.00376244	457.8
2016	1	24	11	30	24	1	0.00731592	-19.2	56	0	0.0751526	0.2	71.178	-2.9097	0.00731592	430.75
2016	1	24	12	0	24	1	0.0143932	-18.05	54	0	0.0799392	0.2	148.923	-2.91626	0.0143932	403.7
2016	1	24	12	30	24	1	0.0158918	-16.9	52	0	0.0848286	0.2	143.863	-2.92083	0.0158918	377.3
2016	1	24	13	0	24	1	0.00953741	-16.2	50	0	0.0864904	0.2	93.1234	-2.92541	0.00953741	350.9
2016	1	24	13	30	24	1	0.013001	-15.5	48	0	0.0880115	0.2	104.294	-2.92507	0.013001	298.95
2016	1	24	14	0	24	1	0.0147993	-14.85	47	0	0.0909388	0.2	90.101	-2.92473	0.0147993	247
2016	1	24	14	30	24	1	0.00967451	-14.2	46	0	0.0938919	0.2	57.5334	-2.93046	0.00967451	180.25
2016	1	24	15	0	24	1	0.0160379	-14.8	49	0	0.0952003	0.2	102.133	-2.9362	0.0160379	113.5
2016	1	24	15	30	24	1	0.00620791	-15.4	52	0	0.0961398	0.2	24.459	-2.94597	0.00620791	60
2016	1	24	16	0	24	-9999	0.00855283	-17.3	59.5	0	0.0938505	0.2	-14.595	-2.95574	0.00855283	6.5
2016	1	24	16	30	24	-9999	0.00521277	-19.2	67	0	0.0899147	0.2	-23.3036	-3.0822	-9999	3.25
2016	1	24	17	0	24	-9999	0.00187272	-20.2	71	0	0.0874179	0.2	-32.0121	-3.20865	0.00187272	0
2016	1	24	17	30	24	-9999	0.000687528	-21.2	75	0	0.0846542	0.2	-24.0839	-3.20597	0.000687528	0
2016	1	24	18	0	24	-9999	0.0021384	-21.2	74	0	0.0835254	0.2	-57.7	-3.20328	0.0021384	0
2016	1	24	18	30	24	-9999	0.000352188	-21.2	73	0	0.0823967	0.2	-47.4538	-3.20164	-9999	0
2016	1	24	19	0	24	-9999	-0.00143402	-20.4	68	0	0.0822862	0.2	-34.3533	-3.2	-0.00143402	0
2016	1	24	19	30	24	-9999	0.000561087	-19.6	63	0	0.0816905	0.2	-28.4147	-3.2	-9999	0
2016	1	24	20	0	24	-9999	0.000503319	-20.05	64	0	0.079828	0.2	-28.3359	-3.2	-9999	0
2016	1	24	20	30	24	-9999	0.000520463	-20.5	65	0	0.0779767	0.2	-28.6253	-3.2	-9999	0
2016	1	24	21	0	24	-9999	0.000749444	-20.8	66	0	0.077139	0.2	-28.8108	-3.2	-9999	0
2016	1	24	21	30	24	-9999	-0.00122731	-21.1	67	0	0.0762874	0.2	-25.9027	-3.1959	-0.00122731	0
2016	1	24	22	0	24	-9999	-0.00289008	-21.35	67.5	0	0.0751966	0.2	-54.7424	-3.1918	-0.00289008	0
2016	1	24	22	30	24	-9999	0.000172808	-21.6	68	0	0.0741135	0.2	-30.4368	-3.17254	-9999	0
2016	1	24	23	0	24	-9999	0.000298563	-21.75	68.5	0	0.0736827	0.2	-30.9892	-3.15328	-9999	0
2016	1	24	23	30	24	-9999	0.000319896	-21.9	69	0	0.0732491	0.2	-31.5864	-3.15328	-9999	0
2016	1	25	0	0	25	-9999	-0.0019278	-21.85	69	0	0.0735717	0.2	-35.7719	-3.15328	-0.0019278	0
2016	1	25	0	30	25	-9999	-0.00288943	-21.8	69	0	0.0738955	0.2	-45.6701	-3.15164	-0.00288943	0
2016	1	25	1	0	25	-9999	-0.00206777	-22.4	70	0	0.0711087	0.2	-38.3453	-3.15	-0.00206777	0
2016	1	25	1	30	25	-9999	-0.00028015	-23	71	0	0.0683932	0.2	-32.3608	-3.16066	-9999	0
2016	1	25	2	0	25	-9999	-0.00028015	-23.05	72.5	0	0.0695287	0.2	-32.3608	-3.17131	-9999	0
2016	1	25	2	30	25	-9999	-0.00028015	-23.1	74	0	0.0706527	0.2	-32.627	-3.19877	-9999	0
2016	1	25	3	0	25	-9999	0.000376462	-22.45	72.5	0	0.0733238	0.2	-30.4503	-3.22623	-9999	0
2016	1	25	3	30	25	-9999	-0.00118519	-21.8	71	0	0.0760374	0.2	-25.018	-3.21352	-0.00118519	0
2016	1	25	4	0	25	-9999	-0.00107568	-21.85	70.5	0	0.075171	0.2	-20.1868	-3.20082	-0.00107568	0
2016	1	25	4	30	25	-9999	-0.00250193	-21.9	70	0	0.0743107	0.2	-33.2449	-3.21393	-0.00250193	0
2016	1	25	5	0	25	-9999	-0.000784728	-21.45	69.5	0	0.0767502	0.2	-13.3555	-3.22705	-0.000784728	0
2016	1	25	5	30	25	-9999	-0.000730944	-21	69	0	0.0792528	0.2	-11.8744	-3.21598	-9999	0
2016	1	25	6	0	25	-9999	-0.00067716	-20.65	68.5	0	0.081112	0.2	-10.3932	-3.20492	-9999	0
2016	1	25	6	30	25	-9999	-0.000623376	-20.3	68	0	0.0830024	0.2	-8.912	-3.21066	-0.000623376	1.2
2016	1	25	7	0	25	1	-0.00324065	-19.75	67	0	0.085762	0.2	-57.0946	-3.21639	-0.00324065	2.4
2016	1	25	7	30	25	1	-0.00467338	-19.2	66	0	0.0885727	0.2	-59.8938	-3.2082	-0.00467338	62.8
2016	1	25	8	0	25	1	-0.00705804	-18.3	63.5	0	0.0920268	0.2	-73.4749	-3.2	-0.00705804	123.2
2016	1	25	8	30	25	1	-0.00141264	-17.4	61	0	0.0954083	0.2	-36.7275	-3.2	-0.00141264	188.6
2016	1	25	9	0	25	1	-0.00160056	-16.5	58.5	0	0.0986875	0.2	-29.8149	-3.2	-0.00160056	254
2016	1	25	9	30	25	1	0.000648	-15.6	56	0	0.101831	0.2	54.1768	-3.2	-9999	295
2016	1	25	10	0	25	1	0.00289656	-14.75	54	0	0.105348	0.2	138.169	-3.2	-9999	336
2016	1	25	10	30	25	1	0.00514512	-13.9	52	0	0.108779	0.2	61.2835	-3.2	0.00514512	357.05
2016	1	25	11	0	25	1	0.0103501	-13.3	50	0	0.109843	0.2	94.6658	-3.2	0.0103501	378.1
2016	1	25	11	30	25	1	0.0211387	-12.7	48	0	0.11071	0.2	91.9177	-3.2	0.0211387	379.6
2016	1	25	12	0	25	1	0.0153927	-12.45	48.5	0	0.114148	0.2	152.444	-3.2	0.0153927	381.1
2016	1	25	12	30	25	1	0.0154685	-12.2	49	0	0.117674	0.2	121.208	-3.19344	0.0154685	359.5
2016	1	25	13	0	25	1	0.0129794	-12.15	47.5	0	0.114532	0.2	122.157	-3.18689	0.0129794	337.9
2016	1	25	13	30	25	1	0.0172849	-12.1	46	0	0.111363	0.2	150.232	-3.16844	0.0172849	284.5
2016	1	25	14	0	25	1	0.00987348	-11.95	45	0	0.110265	0.2	85.5613	-3.15	0.00987348	231.1
2016	1	25	14	30	25	1	0.00734385	-11.8	44	0	0.109122	0.2	50.1151	-3.15984	0.00734385	165.4
2016	1	25	15	0	25	1	0.0072702	-12.6	46.5	0	0.108122	0.2	65.4704	-3.16967	0.0072702	99.7
2016	1	25	15	30	25	1	0.00506524	-13.4	49	0	0.106773	0.2	18.8942	-3.16434	-9999	53.35
2016	1	25	16	0	25	-9999	0.00286027	-13.95	50.5	0	0.10521	0.2	-27.7274	-3.15902	0.00286027	7
2016	1	25	16	30	25	-9999	0.00108605	-14.5	52	0	0.103556	0.2	-74.349	-3.14836	0.00108605	3.5
2016	1	25	17	0	25	-9999	-0.000515808	-15.05	54.5	0	0.103723	0.2	-73.9251	-3.1377	-0.000515808	0
2016	1	25	17	30	25	-9999	8.1648e-05	-15.6	57	0	0.10365	0.2	-39.3849	-3.10369	8.1648e-05	0
2016	1	25	18	0	25	-9999	-0.0004698	-16	59.5	0	0.104655	0.2	-32.5035	-3.06967	-9999	0
2016	1	25	18	30	25	-9999	-0.00102125	-16.4	62	0	0.105471	0.2	-24.1417	-3.06025	-9999	0
2016	1	25	19	0	25	-9999	-0.0015727	-16.85	65	0	0.106482	0.2	-39.8826	-3.05082	-0.0015727	0
2016	1	25	19	30	25	-9999	-0.00266328	-17.3	68	0	0.107258	0.2	-66.533	-3.04057	-0.00266328	0
2016	1	25	20	0	25	-9999	-0.0022032	-17.65	69.5	0	0.106431	0.2	-23.0052	-3.03033	-0.0022032	0
2016	1	25	20	30	25	-9999	-0.00207684	-18	71	0	0.105552	0.2	-32.5246	-3.01516	-9999	0
2016	1	25	21	0	25	-9999	-0.00195048	-17.85	72	0	0.108409	0.2	-42.0439	-3	-0.00195048	0
2016	1	25	21	30	25	-9999	-0.0017172	-17.7	73	0	0.111319	0.2	-21.5415	-3	-0.0017172	0
2016	1	25	22	0	25	-9999	-0.00351864	-17.55	73	0	0.11274	0.2	-24.9352	-3	-0.00351864	0
2016	1	25	22	30	25	-9999	-0.00432864	-17.4	73	0	0.114177	0.2	-29.1384	-3	-0.00432864	0
2016	1	25	23	0	25	-9999	-0.00375516	-17.15	73.5	0	0.117407	0.2	-20.7393	-3	-9999	0
2016	1	25	23	30	25	-9999	-0.00318168	-16.9	74	0	0.120718	0.2	-12.3402	-2.99385	-0.00318168	0
2016	1	26	0	0	26	-9999	-0.00365148	-16.85	74.5	0	0.122045	0.2	-14.6449	-2.9877	-9999	0
2016	1	26	0	30	26	-9999	-0.00412128	-16.8	75	0	0.123381	0.2	-16.9496	-2.96885	-0.00412128	0
2016	1	26	1	0	26	-9999	0.00245555	-16.55	75	0	0.125994	0.2	-11.9459	-2.95	-9999	0
2016	1	26	1	30	26	-9999	0.00263221	-16.3	75	0	0.128657	0.2	-31.234	-2.95	-9999	0
2016	1	26	2	0	26	-9999	0.00245555	-16.5	75.5	0	0.127366	0.2	-30.7246	-2.95	-9999	0
2016	1	26	2	30	26	-9999	0.00245555	-16.7	76	0	0.126079	0.2	-30.7292	-2.95615	-9999	0
2016	1	26	3	0	26	-9999	0.00205314	-17.05	77	0	0.124038	0.2	-31.2744	-2.9623	-9999	0
2016	1	26	3	30	26	-9999	0.00189592	-17.4	78	0	0.121998	0.2	-32.0643	-2.96598	-9999	0
2016	1	26	4	0	26	-9999	0.00132888	-17.9	79	0	0.118446	0.2	-36.2043	-2.96967	-9999	0
2016	1	26	4	30	26	-9999	-0.000316874	-18.4	80	0	0.114957	0.2	-38.1232	-2.98074	-9999	0
2016	1	26	5	0	26	-9999	-0.000340859	-19.4	79	0	0.104214	0.2	-36.7342	-2.9918	-9999	0
2016	1	26	5	30	26	-9999	-0.000649193	-20.4	78	0	0.0943872	0.2	-28.4962	-2.99221	-9999	0
2016	1	26	6	0	26	-9999	-0.000496531	-20.75	79	0	0.0927356	0.2	-29.4545	-2.99262	-9999	0
2016	1	26	6	30	26	-9999	-0.000380693	-21.1	80	0	0.0910894	0.2	-30.4128	-2.99631	-9999	0.3
2016	1	26	7	0	26	1	0.00943758	-21.45	79.5	0	0.0877934	0.2	-14.8918	-3	0.00943758	0.6
2016	1	26	7	30	26	1	-0.000219964	-21.8	79	0	0.0846049	0.2	-7.61809	-2.97746	-9999	26.3
2016	1	26	8	0	26	1	0.000716999	-20.35	78	0	0.0947971	0.2	-2.38833	-2.95492	-9999	52
2016	1	26	8	30	26	1	0.00145137	-18.9	77	0	0.106024	0.2	35.6622	-2.95615	-9999	120.2
2016	1	26	9	0	26	1	0.0334058	-18.05	72.5	0	0.107326	0.2	25.53	-2.95738	0.0334058	188.4
2016	1	26	9	30	26	1	0.0191954	-17.2	68	0	0.108165	0.2	47.438	-2.95943	0.0191954	241.5
2016	1	26	10	0	26	1	0.0146326	-16.45	65	0	0.110113	0.2	47.93	-2.96148	0.0146326	294.6
2016	1	26	10	30	26	1	0.0110732	-15.7	62	0	0.111809	0.2	96.2707	-2.95738	0.0110732	243.6
2016	1	26	11	0	26	1	0.00728364	-15.25	59	0	0.110446	0.2	92.9014	-2.95328	0.00728364	192.6
2016	1	26	11	30	26	1	0.013382	-14.8	56	0	0.1088	0.2	151.768	-2.95041	0.013382	211.05
2016	1	26	12	0	26	1	0.0114872	-14.4	55	0	0.110434	0.2	89.6668	-2.94754	0.0114872	229.5
2016	1	26	12	30	26	1	0.0125059	-14	54	0	0.112042	0.2	127.24	-2.94877	0.0125059	296.1
2016	1	26	13	0	26	1	0.00824163	-14.05	63	0	0.130182	0.2	154.411	-2.95	0.00824163	362.7
2016	1	26	13	30	26	1	0.00882703	-14.1	72	0	0.148171	0.2	121.164	-2.95	-9999	258.7
2016	1	26	14	0	26	1	0.0081396	-14.15	63	0	0.129119	0.2	48.0562	-2.95	-9999	154.7
2016	1	26	14	30	26	1	0.00765499	-14.2	54	0	0.110221	0.2	69.1272	-2.95	-9999	139.35
2016	1	26	15	0	26	1	0.00178848	-14.75	57.5	0	0.112176	0.2	12.8789	-2.95	0.00178848	124
2016	1	26	15	30	26	1	0.00419839	-15.3	61	0	0.113718	0.2	18.3465	-2.96434	0.00419839	66.55
2016	1	26	16	0	26	-9999	0.00488637	-15.65	64.5	0	0.116802	0.2	-0.445838	-2.97869	0.00488637	9.1
2016	1	26	16	30	26	-9999	0.00225504	-16	68	0	0.119606	0.2	-19.2382	-2.96844	0.00225504	4.55
2016	1	26	17	0	26	-9999	0.00676318	-16.4	68	0	0.115678	0.2	-33.6697	-2.9582	0.00676318	0
2016	1	26	17	30	26	-9999	-0.00038232	-16.8	68	0	0.111865	0.2	-48.1011	-2.9418	-0.00038232	0
2016	1	26	18	0	26	-9999	0.0020966	-17.05	64	0	0.103096	0.2	-60.9009	-2.92541	-9999	0
2016	1	26	18	30	26	-9999	0.00457553	-17.3	60	0	0.0946391	0.2	-14.0846	-2.9209	0.00457553	0
2016	1	26	19	0	26	-9999	0.00117968	-17.85	60.5	0	0.0910935	0.2	-24.1002	-2.91639	-9999	0
2016	1	26	19	30	26	-9999	-0.00221616	-18.4	61	0	0.0876545	0.2	-41.8082	-2.91434	-0.00221616	0
2016	1	26	20	0	26	-9999	-7.776e-05	-18.55	62.5	0	0.0886695	0.2	-26.7237	-2.9123	-7.776e-05	0
2016	1	26	20	30	26	-9999	-0.000399384	-18.7	64	0	0.089643	0.2	-45.2121	-2.90615	-9999	0
2016	1	26	21	0	26	-9999	-0.000721008	-19.05	65.5	0	0.0890389	0.2	-30.9701	-2.9	-9999	0
2016	1	26	21	30	26	-9999	-0.00104263	-19.4	67	0	0.0883842	0.2	-39.9071	-2.89877	-0.00104263	0
2016	1	26	22	0	26	-9999	-0.000700164	-20.75	68	0	0.079823	0.2	-18.6823	-2.89754	-0.000700164	0
2016	1	26	22	30	26	-9999	-0.000123967	-22.1	69	0	0.0719717	0.2	-40.0647	-2.89385	-9999	0
2016	1	26	23	0	26	-9999	-0.000520852	-22.6	73.5	0	0.0733561	0.2	-33.1425	-2.89016	-9999	0
2016	1	26	23	30	26	-9999	-0.00066173	-23.1	78	0	0.0744718	0.2	-32.851	-2.87951	-9999	0
2016	1	27	0	0	27	-9999	-0.000268316	-23.4	76	0	0.0706508	0.2	-32.0602	-2.86885	-9999	0
2016	1	27	0	30	27	-9999	-0.000194998	-23.7	74	0	0.0669745	0.2	-30.7085	-2.87787	-9999	0
2016	1	27	1	0	27	-9999	-0.000566299	-24.3	75.5	0	0.0647556	0.2	-31.3761	-2.88689	-9999	0
2016	1	27	1	30	27	-9999	-0.000327032	-24.9	77	0	0.0625667	0.2	-30.0791	-2.89344	-9999	0
2016	1	27	2	0	27	-9999	-0.00255312	-25.4	76.5	0	0.0594086	0.2	-17.1335	-2.9	-0.00255312	0
2016	1	27	2	30	27	-9999	-0.00091368	-25.9	76	0	0.0563956	0.2	-10.8314	-2.9	-0.00091368	0
2016	1	27	3	0	27	-9999	-0.000718006	-25.95	75	0	0.0554003	0.2	-18.6456	-2.9	-9999	0
2016	1	27	3	30	27	-9999	-0.000718006	-26	74	0	0.0544128	0.2	-26.4598	-2.9	-9999	0
2016	1	27	4	0	27	-9999	-0.000718006	-25.9	75	0	0.0556535	0.2	-34.274	-2.9	-9999	0
2016	1	27	4	30	27	-9999	-0.000824904	-25.8	76	0	0.056912	0.2	-32.7816	-2.9	-0.000824904	0
2016	1	27	5	0	27	-9999	0.00132192	-23.05	75.5	0	0.0724058	0.2	-41.9087	-2.9	0.00132192	0
2016	1	27	5	30	27	-9999	0.00258552	-20.3	75	0	0.0915468	0.2	-39.1557	-2.9	0.00258552	0
2016	1	27	6	0	27	-9999	0.00299376	-20.65	75	0	0.0888088	0.2	-36.1088	-2.9	0.00299376	0
2016	1	27	6	30	27	-9999	-0.00788616	-21	75	0	0.0861443	0.2	-42.558	-2.90287	-0.00788616	0
2016	1	27	7	0	27	1	-0.0203911	-20.8	74.5	0	0.0870736	0.2	-18.6803	-2.90574	-0.0203911	0
2016	1	27	7	30	27	1	0.00255375	-20.6	74	0	0.0880061	0.2	-18.521	-2.90779	-9999	66.65
2016	1	27	8	0	27	1	0.0254986	-20.1	69.5	0	0.0863144	0.2	4.11776	-2.90984	0.0254986	133.3
2016	1	27	8	30	27	1	0.0135994	-19.6	65	0	0.0842838	0.2	-14.3179	-2.91926	0.0135994	218.7
2016	1	27	9	0	27	1	0.00702897	-19.1	62	0	0.0839209	0.2	11.9145	-2.92869	0.00702897	304.1
2016	1	27	9	30	27	1	0.013254	-18.6	59	0	0.0833478	0.2	38.147	-2.9373	0.013254	345.85
2016	1	27	10	0	27	1	0.00843804	-17.9	56.5	0	0.0847111	0.2	64.3794	-2.9459	0.00843804	387.6
2016	1	27	10	30	27	1	0.00736393	-17.2	54	0	0.085896	0.2	127.313	-2.94426	0.00736393	397.7
2016	1	27	11	0	27	1	0.0128176	-16.25	50.5	0	0.0869913	0.2	248.626	-2.94262	0.0128176	407.8
2016	1	27	11	30	27	1	0.00776169	-15.3	47	0	0.0876186	0.2	116.068	-2.95369	0.00776169	409.9
2016	1	27	12	0	27	1	0.00816522	-14.9	47.5	0	0.0915279	0.2	171.572	-2.96475	0.00816522	412
2016	1	27	12	30	27	1	0.011662	-14.5	48	0	0.0955898	0.2	248.654	-2.97746	0.011662	398.3
2016	1	27	13	0	27	1	0.0120445	-14.2	45	0	0.0918508	0.2	174.483	-2.99016	0.0120445	384.6
2016	1	27	13	30	27	1	0.00942064	-13.9	42	0	0.08786	0.2	172.573	-2.99426	0.00942064	331.7
2016	1	27	14	0	27	1	0.00681135	-14.2	41	0	0.0836863	0.2	120.316	-2.99836	0.00681135	278.8
2016	1	27	14	30	27	1	0.0112027	-14.5	40	0	0.0796582	0.2	127.303	-2.99918	0.0112027	214.4
2016	1	27	15	0	27	1	0.00719804	-15.1	42	0	0.079604	0.2	74.8268	-3	-9999	150
2016	1	27	15	30	27	1	0.00319334	-15.7	44	0	0.0793484	0.2	38.3911	-3.00082	0.00319334	80.7
2016	1	27	16	0	27	-9999	0.00301774	-16.35	46.5	0	0.0794344	0.2	-33.2526	-3.00164	0.00301774	11.4
2016	1	27	16	30	27	-9999	0.00120107	-17	49	0	0.0792657	0.2	-51.0815	-3.00082	0.00120107	5.7
2016	1	27	17	0	27	-9999	0.00054108	-17.45	50	0	0.0778742	0.2	-61.6257	-3	0.00054108	0
2016	1	27	17	30	27	-9999	0.000168085	-17.9	51	0	0.0764649	0.2	-67.2508	-2.99754	-9999	0
2016	1	27	18	0	27	-9999	1.66896e-06	-18.3	53	0	0.0768098	0.2	-63.8472	-2.99508	-9999	0
2016	1	27	18	30	27	-9999	-0.000698182	-18.7	55	0	0.0770369	0.2	-62.2552	-2.97664	-9999	0
2016	1	27	19	0	27	-9999	-0.000998568	-18.8	55	0	0.0763817	0.2	-40.454	-2.9582	-0.000998568	0
2016	1	27	19	30	27	-9999	-0.00148295	-18.9	55	0	0.0757315	0.2	-38.7592	-2.9541	-9999	0
2016	1	27	20	0	27	-9999	-0.00196733	-19.4	57	0	0.0751926	0.2	-61.8058	-2.95	-0.00196733	0
2016	1	27	20	30	27	-9999	-0.00253627	-19.9	59	0	0.074551	0.2	-35.8545	-2.95	-9999	0
2016	1	27	21	0	27	-9999	-0.00310522	-20.35	60.5	0	0.0735285	0.2	-54.6648	-2.95	-9999	0
2016	1	27	21	30	27	-9999	-0.00367416	-20.8	62	0	0.0724639	0.2	-73.4752	-2.95	-0.00367416	0
2016	1	27	22	0	27	-9999	-0.000275691	-21.85	65.5	0	0.0698398	0.2	-58.2496	-2.95	-9999	0
2016	1	27	22	30	27	-9999	-0.000710276	-22.9	69	0	0.0670591	0.2	-43.0241	-2.95	-9999	0
2016	1	27	23	0	27	-9999	-0.000756526	-23.3	70.5	0	0.0661243	0.2	-27.7985	-2.95	-9999	0
2016	1	27	23	30	27	-9999	-0.000264004	-23.7	72	0	0.0651644	0.2	-18.7207	-2.95	-9999	0
2016	1	28	0	0	28	-9999	-0.000622283	-24.3	73	0	0.0626113	0.2	-30.1673	-2.95	-9999	0
2016	1	28	0	30	28	-9999	-0.000334072	-24.9	74	0	0.060129	0.2	-28.0572	-2.95	-9999	0
2016	1	28	1	0	28	-9999	-0.00063588	-26.1	72.5	0	0.0528252	0.2	-25.2549	-2.95	-9999	0
2016	1	28	1	30	28	-9999	-0.00126058	-27.3	71	0	0.0463319	0.2	-22.0442	-2.95	-9999	0
2016	1	28	2	0	28	-9999	-0.00126994	-27.05	74	0	0.0494166	0.2	-22.6472	-2.95	-9999	0
2016	1	28	2	30	28	-9999	-0.00103222	-26.8	77	0	0.0526173	0.2	-23.1059	-2.95	-9999	0
2016	1	28	3	0	28	-9999	-0.00136432	-27.15	75.5	0	0.0499555	0.2	-21.994	-2.95	-9999	0
2016	1	28	3	30	28	-9999	-0.00131836	-27.5	74	0	0.0474046	0.2	-21.6508	-2.96393	-9999	0
2016	1	28	4	0	28	-9999	-0.00117605	-28.75	74	0	0.0421962	0.2	-12.9933	-2.97787	-9999	0
2016	1	28	4	30	28	-9999	-0.00117359	-30	74	0	0.0375082	0.2	-14.5218	-2.98893	-9999	0
2016	1	28	5	0	28	-9999	-0.00111083	-30.45	74	0	0.0359388	0.2	-14.3845	-3	-9999	0
2016	1	28	5	30	28	-9999	-0.00107538	-30.9	74	0	0.0344288	0.2	-11.2539	-3	-9999	0
2016	1	28	6	0	28	-9999	-0.000918745	-31.4	73	0	0.0323748	0.2	-9.79	-3	-9999	0
2016	1	28	6	30	28	-9999	-0.000842134	-31.9	72	0	0.0304306	0.2	-9.79	-3	-9999	1.2
2016	1	28	7	0	28	1	-0.00150012	-31.3	74	0	0.0331348	0.2	-34.4329	-3	-0.00150012	2.4
2016	1	28	7	30	28	1	0.0002069	-30.7	76	0	0.0360412	0.2	10.7507	-3	0.0002069	84.25
2016	1	28	8	0	28	1	-4.24267e-05	-28.95	75.5	0	0.0422518	0.2	22.219	-3	-9999	166.1
2016	1	28	8	30	28	1	-0.000291753	-27.2	75	0	0.0493962	0.2	33.6872	-3	-9999	234.95
2016	1	28	9	0	28	1	-0.00054108	-24.2	68	0	0.058849	0.2	78.3696	-3	-0.00054108	303.8
2016	1	28	9	30	28	1	0.00938666	-21.2	61	0	0.0688521	0.2	123.052	-3	-9999	336.85
2016	1	28	10	0	28	1	0.0193144	-20	57	0	0.0714047	0.2	167.734	-3	0.0193144	369.9
2016	1	28	10	30	28	1	0.0104286	-18.8	53	0	0.0736042	0.2	152.174	-3	0.0104286	430.15
2016	1	28	11	0	28	1	0.00669125	-17.9	51	0	0.0764649	0.2	149.035	-3	0.00669125	490.4
2016	1	28	11	30	28	1	0.00380596	-17	49	0	0.0792657	0.2	127.789	-2.99918	0.00380596	457.95
2016	1	28	12	0	28	1	0.003726	-16.6	46.5	0	0.0777897	0.2	133.545	-2.99836	0.003726	425.5
2016	1	28	12	30	28	1	0.0119404	-16.2	44	0	0.0761115	0.2	137.831	-2.99918	0.0119404	399.1
2016	1	28	13	0	28	1	0.0082199	-16.1	43.5	0	0.0758772	0.2	142.118	-3	0.0082199	372.7
2016	1	28	13	30	28	1	0.00866536	-16	43	0	0.075633	0.2	128.895	-3	0.00866536	318.2
2016	1	28	14	0	28	1	0.0050881	-15.75	42.5	0	0.0763255	0.2	146.033	-3	0.0050881	263.7
2016	1	28	14	30	28	1	0.00475632	-15.5	42	0	0.0770101	0.2	99.2179	-3.00082	0.00475632	196.05
2016	1	28	15	0	28	1	0.00390744	-16.15	43	0	0.0746928	0.2	55.4218	-3.00164	0.00390744	128.4
2016	1	28	15	30	28	1	0.00371304	-16.8	44	0	0.0723833	0.2	14.5345	-3.01352	0.00371304	69.95
2016	1	28	16	0	28	-9999	0.00179496	-17.6	44	0	0.0676664	0.2	-19.5505	-3.02541	-9999	11.5
2016	1	28	16	30	28	-9999	-0.00012312	-18.4	44	0	0.0632262	0.2	-54.6218	-3.01598	-0.00012312	5.75
2016	1	28	17	0	28	-9999	-0.00036288	-19.3	46.5	0	0.0618703	0.2	-35.7807	-3.00656	-0.00036288	0
2016	1	28	17	30	28	-9999	0.00020088	-20.2	49	0	0.0603306	0.2	-46.7983	-3.00984	0.00020088	0
2016	1	28	18	0	28	-9999	-0.00034992	-20.1	48.5	0	0.0602338	0.2	-55.3453	-3.01311	-0.00034992	0
2016	1	28	18	30	28	-9999	-0.000587995	-20	48	0	0.0601302	0.2	-66.6734	-3.00738	-0.000587995	0
2016	1	28	19	0	28	-9999	-0.000960336	-20.7	50.5	0	0.0595386	0.2	-41.2203	-3.00164	-0.000960336	0
2016	1	28	19	30	28	-9999	-0.000709659	-21.4	53	0	0.0587856	0.2	-35.0134	-2.98156	-9999	0
2016	1	28	20	0	28	-9999	-0.000465775	-22.15	55.5	0	0.0576359	0.2	-33.3487	-2.96148	-9999	0
2016	1	28	20	30	28	-9999	-0.000896933	-22.9	58	0	0.0563685	0.2	-32.3654	-2.95574	-9999	0
2016	1	28	21	0	28	-9999	-0.000946306	-23.15	59.5	0	0.0565567	0.2	-32.1029	-2.95	-9999	0
2016	1	28	21	30	28	-9999	-0.000499041	-23.4	61	0	0.0567066	0.2	-31.5083	-2.95	-9999	0
2016	1	28	22	0	28	-9999	-0.000617069	-24.65	64	0	0.0531901	0.2	-28.0362	-2.95	-9999	0
2016	1	28	22	30	28	-9999	-0.000766568	-25.9	67	0	0.0497172	0.2	-26.671	-2.95	-9999	0
2016	1	28	23	0	28	-9999	-0.000791354	-26.15	69.5	0	0.0504085	0.2	-25.0885	-2.95	-9999	0
2016	1	28	23	30	28	-9999	-0.000803874	-26.4	72	0	0.0510406	0.2	-24.7449	-2.95	-9999	0
2016	1	29	0	0	29	-9999	-0.00126058	-27.4	71.5	0	0.0462289	0.2	-22.0442	-2.95	-9999	0
2016	1	29	0	30	29	-9999	-0.00157532	-28.4	71	0	0.0418324	0.2	-20.0346	-2.95	-9999	0
2016	1	29	1	0	29	-9999	-0.00117605	-28.8	73.5	0	0.0417152	0.2	-12.9933	-2.95	-9999	0
2016	1	29	1	30	29	-9999	-0.00132697	-29.2	76	0	0.0415443	0.2	-17.1999	-2.95	-9999	0
2016	1	29	2	0	29	-9999	-0.00143112	-29.65	75	0	0.039295	0.2	-18.3812	-2.95	-9999	0
2016	1	29	2	30	29	-9999	-0.00117359	-30.1	74	0	0.0371542	0.2	-14.5218	-2.95615	-9999	0
2016	1	29	3	0	29	-9999	-0.00107538	-30.85	73	0	0.0341263	0.2	-11.2539	-2.9623	-9999	0
2016	1	29	3	30	29	-9999	-0.000918745	-31.6	72	0	0.0313232	0.2	-9.79	-2.97213	-9999	0
2016	1	29	4	0	29	-9999	-0.000842134	-32.05	72.5	0	0.0302012	0.2	-9.79	-2.98197	-9999	0
2016	1	29	4	30	29	-9999	-0.000656077	-32.5	73	0	0.0291125	0.2	-6.44836	-2.99098	-9999	0
2016	1	29	5	0	29	-9999	-0.000656077	-32.95	71.5	0	0.0272931	0.2	-6.44836	-3	-9999	0
2016	1	29	5	30	29	-9999	-0.000779359	-33.4	70	0	0.0255712	0.2	-8.90537	-3	-9999	0
2016	1	29	6	0	29	-9999	-0.000911412	-33.75	70	0	0.0247083	0.2	-14.053	-3	-9999	0
2016	1	29	6	30	29	-9999	-0.00079367	-34.1	70	0	0.0238718	0.2	-9.97707	-3	-9999	1.85
2016	1	29	7	0	29	1	-0.000575424	-33.7	71.5	0	0.025362	0.2	-6.66366	-3	-0.000575424	3.7
2016	1	29	7	30	29	1	-0.000728352	-33.3	73	0	0.0269294	0.2	-5.2825	-2.99098	-0.000728352	92.25
2016	1	29	8	0	29	1	1.296e-05	-31	72	0	0.0331795	0.2	21.9807	-2.98197	1.296e-05	180.8
2016	1	29	8	30	29	1	-0.00020736	-28.7	71	0	0.0406755	0.2	2.89193	-2.99057	-0.00020736	-9999
2016	1	29	9	0	29	1	-0.00018792	-25.6	65.5	0	0.0499502	0.2	36.5761	-2.99918	-0.00018792	-9999
2016	1	29	9	30	29	1	0.00459662	-22.5	60	0	0.0604143	0.2	70.2603	-3.00082	-9999	-9999
2016	1	29	10	0	29	1	0.00938115	-21.35	57	0	0.0634993	0.2	103.944	-3.00246	0.00938115	-9999
2016	1	29	10	30	29	1	0.0105265	-20.2	54	0	0.0664868	0.2	117.016	-3.00246	0.0105265	-9999
2016	1	29	11	0	29	1	0.00843753	-19.1	48	0	0.064971	0.2	112.31	-3.00246	0.00843753	-9999
2016	1	29	11	30	29	1	0.0098425	-18	42	0	0.0624393	0.2	161.629	-3.00943	-9999	-9999
2016	1	29	12	0	29	1	0.0112475	-17.3	40.5	0	0.0638814	0.2	199.065	-3.01639	0.0112475	-9999
2016	1	29	12	30	29	1	0.00897755	-16.6	39	0	0.065243	0.2	169.036	-3.03156	0.00897755	-9999
2016	1	29	13	0	29	1	0.0101476	-16.05	35	0	0.0613057	0.2	108.185	-3.04672	0.0101476	-9999
2016	1	29	13	30	29	1	0.00624089	-15.5	31	0	0.0568408	0.2	103.769	-3.04262	0.00624089	-9999
2016	1	29	14	0	29	1	0.007527	-15.45	32.5	0	0.0598388	0.2	133.301	-3.03852	0.007527	-9999
2016	1	29	14	30	29	1	0.00624672	-15.4	34	0	0.0628606	0.2	103.671	-3.04426	0.00624672	-9999
2016	1	29	15	0	29	1	0.00481464	-16.05	36.5	0	0.0639331	0.2	73.943	-3.05	0.00481464	-9999
2016	1	29	15	30	29	1	0.00152928	-16.7	39	0	0.0646984	0.2	15.3545	-3.05451	0.00152928	-9999
2016	1	29	16	0	29	-9999	-0.000644967	-18.35	44.5	0	0.0642174	0.2	-37.056	-3.05902	-9999	-9999
2016	1	29	16	30	29	-9999	-0.00102804	-20	50	0	0.0626357	0.2	-35.4843	-3.04672	-9999	-9999
2016	1	29	17	0	29	-9999	-0.000742718	-21.5	56.5	0	0.0621215	0.2	-35.0555	-3.03443	-9999	-9999
2016	1	29	17	30	29	-9999	0.00120722	-23	63	0	0.0606869	0.2	-75.1715	-3.025	0.00120722	-9999
2016	1	29	18	0	29	-9999	-0.000465668	-23.5	64.5	0	0.0594281	0.2	-30.5122	-3.01557	-9999	-9999
2016	1	29	18	30	29	-9999	-0.000765035	-24	66	0	0.0581519	0.2	-30.2412	-3.0127	-9999	-9999
2016	1	29	19	0	29	-9999	-0.000591613	-24.85	68.5	0	0.0559119	0.2	-28.4418	-3.00984	-9999	-9999
2016	1	29	19	30	29	-9999	-0.000893594	-25.7	71	0	0.0536542	0.2	-26.1174	-3.02377	-9999	-9999
2016	1	29	20	0	29	-9999	-0.0013863	-26.9	70.5	0	0.0477343	0.2	-23.6618	-3.0377	-9999	-9999
2016	1	29	20	30	29	-9999	-0.00162199	-28.1	70	0	0.0424129	0.2	-22.2079	-3.04016	-9999	-9999
2016	1	29	21	0	29	-9999	-0.00141502	-28.95	69.5	0	0.038894	0.2	-15.9311	-3.04262	-9999	-9999
2016	1	29	21	30	29	-9999	-0.00159516	-29.8	69	0	0.0356424	0.2	-18.3812	-3.02377	-9999	-9999
2016	1	29	22	0	29	-9999	-0.00138447	-30.25	70.5	0	0.0348964	0.2	-14.5218	-3.00492	-9999	-9999
2016	1	29	22	30	29	-9999	-0.00120896	-30.7	72	0	0.0341443	0.2	-9.05128	-2.98402	-9999	-9999
2016	1	29	23	0	29	-9999	-0.00135592	-30.6	72.5	0	0.0347108	0.2	-11.4398	-2.96311	-9999	-9999
2016	1	29	23	30	29	-9999	-0.00135592	-30.5	73	0	0.0352848	0.2	-14.3845	-2.96434	-9999	-9999
2016	1	30	0	0	30	-9999	-0.00118784	-31.55	70.5	0	0.0308185	0.3	-9.79	-2.96557	-9999	-9999
2016	1	30	0	30	30	-9999	-0.000656077	-32.6	68	0	0.0268565	0.3	-6.44836	-2.95779	-9999	-9999
2016	1	30	1	0	30	-9999	-0.000656077	-32.9	69.5	0	0.0266592	0.3	-6.44836	-2.95	-9999	-9999
2016	1	30	1	30	30	-9999	-0.000779359	-33.2	71	0	0.0264489	0.3	-8.90537	-2.95041	-9999	-9999
2016	1	30	2	0	30	-9999	-0.000911412	-33.7	70.5	0	0.0250073	0.3	-14.053	-2.95082	-9999	-9999
2016	1	30	2	30	30	-9999	-0.00079367	-34.2	70	0	0.0236375	0.3	-9.97707	-2.9627	-9999	-9999
2016	1	30	3	0	30	-9999	-0.00079367	-34.3	70.5	0	0.0235725	0.3	-9.97707	-2.97459	-9999	-9999
2016	1	30	3	30	30	-9999	-0.00079367	-34.4	71	0	0.0235063	0.3	-9.97707	-2.96639	-9999	-9999
2016	1	30	4	0	30	-9999	-0.00079367	-34.95	70	0	0.0219455	0.3	-9.97707	-2.9582	-9999	-9999
2016	1	30	4	30	30	-9999	-0.00079367	-35.5	69	0	0.0204783	0.3	-9.97707	-2.9541	-9999	-9999
2016	1	30	5	0	30	-9999	-0.00079367	-35.55	68	0	0.0200809	0.3	-14.7645	-2.95	-9999	-9999
2016	1	30	5	30	30	-9999	-0.00079367	-35.6	67	0	0.0196869	0.3	-14.7645	-2.95451	-9999	-9999
2016	1	30	6	0	30	-9999	-0.00079367	-35.5	68.5	0	0.0203299	0.3	-9.97707	-2.95902	-9999	-9999
2016	1	30	6	30	30	-9999	-0.00079367	-35.4	70	0	0.0209836	0.3	-9.97707	-2.98238	-9999	-9999
2016	1	30	7	0	30	1	-0.000233928	-34.75	70.5	0	0.0225456	0.3	-4.45296	-3.00574	-0.000233928	-9999
2016	1	30	7	30	30	1	0.000354672	-34.1	71	0	0.0242128	0.3	2.35992	-2.99508	-9999	-9999
2016	1	30	8	0	30	1	0.000943272	-33.05	70.5	0	0.0266502	0.3	9.17281	-2.98443	-9999	-9999
2016	1	30	8	30	30	1	0.00153187	-32	70	0	0.029301	0.3	62.1196	-2.99016	0.00153187	-9999
2016	1	30	9	0	30	1	-0.00127721	-28.15	68	0	0.0410098	0.3	-31.7087	-2.9959	-0.00127721	-9999
2016	1	30	9	30	30	1	-0.000717552	-24.3	66	0	0.0566075	0.3	49.815	-2.99385	-9999	-9999
2016	1	30	10	0	30	1	-0.000157896	-22.7	60.5	0	0.0598496	0.3	82.4146	-2.9918	-9999	-9999
2016	1	30	10	30	30	1	0.00040176	-21.1	55	0	0.062624	0.3	115.014	-2.99754	0.00040176	-9999
2016	1	30	11	0	30	1	0.0044699	-20.55	52.5	0	0.0627084	0.3	147.614	-3.00328	0.0044699	-9999
2016	1	30	11	30	30	1	0.00503561	-20	50	0	0.0626357	0.3	216.836	-3.01066	0.00503561	-9999
2016	1	30	12	0	30	1	0.0093872	-19.5	47	0	0.0614702	0.3	259.064	-3.01803	0.0093872	-9999
2016	1	30	12	30	30	1	0.0063977	-19	44	0	0.060069	0.3	179.281	-3.01557	0.0063977	-9999
2016	1	30	13	0	30	1	0.00773603	-18.55	42	0	0.0595859	0.3	161.723	-3.01311	0.00773603	-9999
2016	1	30	13	30	30	1	0.00743811	-18.1	40	0	0.0589634	0.3	144.151	-3.00656	0.00743811	-9999
2016	1	30	14	0	30	1	0.00627588	-17.95	39.5	0	0.0589723	0.3	119.017	-3	0.00627588	-9999
2016	1	30	14	30	30	1	0.00495148	-17.8	39	0	0.0589706	0.3	128.775	-3.01352	0.00495148	-9999
2016	1	30	15	0	30	1	0.00396252	-18.35	40.5	0	0.0584451	0.3	103.728	-3.02705	0.00396252	-9999
2016	1	30	15	30	30	1	0.00138542	-18.9	42	0	0.0578314	0.3	14.8963	-3.03402	0.00138542	-9999
2016	1	30	16	0	30	-9999	0.000968112	-20.05	45.5	0	0.0567528	0.3	-11.1386	-3.04098	-9999	-9999
2016	1	30	16	30	30	-9999	0.0005508	-21.2	49	0	0.0553074	0.3	-37.1735	-3.02172	0.0005508	-9999
2016	1	30	17	0	30	-9999	-0.00025272	-22.4	53	0	0.0538395	0.3	-41.5005	-3.00246	-0.00025272	-9999
2016	1	30	17	30	30	-9999	-0.000779544	-23.6	57	0	0.0520513	0.3	-75.3447	-2.98033	-0.000779544	-9999
2016	1	30	18	0	30	-9999	-0.00035316	-23.9	57.5	0	0.0511184	0.3	-43.1411	-2.9582	-0.00035316	-9999
2016	1	30	18	30	30	-9999	-0.000400464	-24.2	58	0	0.0501948	0.3	-41.9178	-2.96148	-9999	-9999
2016	1	30	19	0	30	-9999	-0.000447768	-24.6	59	0	0.049256	0.3	-40.6944	-2.96475	-0.000447768	-9999
2016	1	30	19	30	30	-9999	-0.000104976	-25	60	0	0.0483146	0.3	-29.9136	-2.95533	-0.000104976	-9999
2016	1	30	20	0	30	-9999	-0.0013646	-25.4	61.5	0	0.0477598	0.3	-27.5923	-2.9459	-9999	-9999
2016	1	30	20	30	30	-9999	-0.00158573	-25.8	63	0	0.047177	0.3	-25.9189	-2.92705	-9999	-9999
2016	1	30	21	0	30	-9999	-0.00161691	-26.25	64	0	0.0459968	0.3	-24.2748	-2.9082	-9999	-9999
2016	1	30	21	30	30	-9999	-0.00152077	-26.7	65	0	0.0448273	0.3	-23.276	-2.90615	-9999	-9999
2016	1	30	22	0	30	-9999	-0.00152077	-26.8	64.5	0	0.0440755	0.3	-23.276	-2.9041	-9999	-9999
2016	1	30	22	30	30	-9999	-0.00152077	-26.9	64	0	0.0433333	0.3	-23.276	-2.8873	-9999	-9999
2016	1	30	23	0	30	-9999	-0.000716688	-28.3	68	0	0.0404404	0.3	-21.2689	-2.87049	-0.000716688	-9999
2016	1	30	23	30	30	-9999	-0.00172238	-29.7	72	0	0.0375454	0.3	-31.1861	-2.86311	-0.00172238	-9999
2016	1	31	0	0	31	-9999	-0.00108199	-30.25	71.5	0	0.0353914	0.4	-14.5218	-2.85574	-9999	-9999
2016	1	31	0	30	31	-9999	-0.00100408	-30.8	71	0	0.0333502	0.4	-11.2539	-2.85287	-9999	-9999
2016	1	31	1	0	31	-9999	-0.000840934	-31.65	72	0	0.0311728	0.4	-9.79	-2.85	-9999	-9999
2016	1	31	1	30	31	-9999	-0.000551499	-32.5	73	0	0.0291125	0.4	-6.44836	-2.85041	-9999	-9999
2016	1	31	2	0	31	-9999	-0.000656077	-32.9	72.5	0	0.02781	0.4	-6.44836	-2.85082	-9999	-9999
2016	1	31	2	30	31	-9999	-0.00212479	-33.3	72	0	0.0265605	0.4	-42.659	-2.86107	-0.00212479	-9999
2016	1	31	3	0	31	-9999	-0.000779359	-33.2	72.5	0	0.0270077	0.4	-8.90537	-2.87131	-9999	-9999
2016	1	31	3	30	31	-9999	-0.000656077	-33.1	73	0	0.0274609	0.4	-6.44836	-2.88566	-9999	-9999
2016	1	31	4	0	31	-9999	-0.000911412	-33.6	72	0	0.0257913	0.4	-14.053	-2.9	-9999	-9999
2016	1	31	4	30	31	-9999	-0.00079367	-34.1	71	0	0.0242128	0.4	-9.97707	-2.9	-9999	-9999
2016	1	31	5	0	31	-9999	-0.00079367	-34.65	70	0	0.0226088	0.4	-9.97707	-2.9	-9999	-9999
2016	1	31	5	30	31	-9999	-0.00079367	-35.2	69	0	0.0211005	0.4	-9.97707	-2.9	-9999	-9999
2016	1	31	6	0	31	-9999	-0.00079367	-35.65	69	0	0.0201734	0.4	-14.7645	-2.9	-9999	-9999
2016	1	31	6	30	31	-9999	-0.000371736	-36.1	69	0	0.0192832	0.4	-5.55831	-2.9	-9999	-9999
2016	1	31	7	0	31	1	-0.00079367	-35.1	70	0	0.0216206	0.4	-14.7645	-2.9	-9999	-9999
2016	1	31	7	30	31	1	-0.000305856	-34.1	71	0	0.0242128	0.4	-9.97707	-2.88566	-0.000305856	-9999
2016	1	31	8	0	31	1	-0.000295488	-31.35	72.5	0	0.0323078	0.4	3.5566	-2.87131	-9999	-9999
2016	1	31	8	30	31	1	-0.00028512	-28.6	74	0	0.0427928	0.4	-3.14038	-2.86598	-0.00028512	-9999
2016	1	31	9	0	31	1	-0.000708912	-25.9	65	0	0.0482331	0.4	-21.4664	-2.86066	-0.000708912	-9999
2016	1	31	9	30	31	1	0.00386208	-23.2	56	0	0.0529937	0.4	63.4516	-2.86148	0.00386208	-9999
2016	1	31	10	0	31	1	0.00922752	-22.2	54	0	0.0558317	0.4	148.37	-2.8623	0.00922752	-9999
2016	1	31	10	30	31	1	0.00598752	-21.2	52	0	0.0586936	0.4	132.951	-2.86434	0.00598752	-9999
2016	1	31	11	0	31	1	0.00921671	-20.3	49.5	0	0.0604209	0.4	217.357	-2.86639	0.00921671	-9999
2016	1	31	11	30	31	1	0.00868839	-19.4	47	0	0.0620009	0.4	124.164	-2.87172	-9999	-9999
2016	1	31	12	0	31	1	0.00816007	-18.5	44.5	0	0.0634023	0.4	195.033	-2.87705	0.00816007	-9999
2016	1	31	12	30	31	1	0.00777509	-17.6	42	0	0.0645907	0.4	168.324	-2.88156	0.00777509	-9999
2016	1	31	13	0	31	1	0.00881291	-16.9	40	0	0.0652528	0.4	192.362	-2.88607	0.00881291	-9999
2016	1	31	13	30	31	1	0.00838971	-16.2	38	0	0.0657327	0.4	151.391	-2.88811	0.00838971	-9999
2016	1	31	14	0	31	1	0.00968863	-15.9	37	0	0.0656239	0.4	168.427	-2.89016	0.00968863	-9999
2016	1	31	14	30	31	1	0.0050544	-15.6	36	0	0.065463	0.4	122.93	-2.89221	0.0050544	-9999
2016	1	31	15	0	31	1	0.00360936	-16.2	37.5	0	0.0648678	0.4	70.5532	-2.89426	0.00360936	-9999
2016	1	31	15	30	31	1	0.00240602	-16.8	39	0	0.0641579	0.4	37.5499	-2.9168	-9999	-9999
2016	1	31	16	0	31	-9999	0.00120269	-17.8	41.5	0	0.0627508	0.4	-15.8887	-2.93934	-9999	-9999
2016	1	31	16	30	31	-9999	-6.48e-07	-18.8	44	0	0.0611054	0.4	-55.4869	-2.91967	-6.48e-07	-9999
2016	1	31	17	0	31	-9999	-0.000199519	-19.75	48	0	0.0614414	0.4	-52.0597	-2.9	-0.000199519	-9999
2016	1	31	17	30	31	-9999	-0.000857718	-20.7	52	0	0.0613071	0.4	-36.6611	-2.89877	-9999	-9999
2016	1	31	18	0	31	-9999	-0.000764637	-21.2	53.5	0	0.0603866	0.4	-35.2012	-2.89754	-9999	-9999
2016	1	31	18	30	31	-9999	-0.000797927	-21.7	55	0	0.0594214	0.4	-33.4873	-2.89057	-9999	-9999
2016	1	31	19	0	31	-9999	0.00026568	-21.8	53.5	0	0.0572958	0.4	-23.1651	-2.88361	0.00026568	-9999
2016	1	31	19	30	31	-9999	-0.000171396	-21.9	52	0	0.0552022	0.4	-30.9543	-2.8668	-9999	-9999
2016	1	31	20	0	31	-9999	-0.000608472	-22.75	54.5	0	0.0536759	0.4	-34.405	-2.85	-0.000608472	-9999
2016	1	31	20	30	31	-9999	-0.000890246	-23.6	57	0	0.0520513	0.4	-29.2465	-2.84877	-9999	-9999
2016	1	31	21	0	31	-9999	-0.000949043	-23.35	56.5	0	0.0527578	0.4	-30.179	-2.84754	-9999	-9999
2016	1	31	21	30	31	-9999	-0.00132349	-23.1	56	0	0.0534669	0.4	-31.2137	-2.82008	-9999	-9999
2016	1	31	22	0	31	-9999	-0.000896982	-23.5	58.5	0	0.0538999	0.4	-29.0819	-2.79262	-9999	-9999
2016	1	31	22	30	31	-9999	-0.000979847	-23.9	61	0	0.05423	0.4	-29.3842	-2.775	-9999	-9999
2016	1	31	23	0	31	-9999	-0.000821664	-23.95	62	0	0.0548728	0.4	-20.4194	-2.75738	-0.000821664	-9999
2016	1	31	23	30	31	-9999	-0.0017671	-24	63	0	0.0555087	0.4	-30.5694	-2.75369	-0.0017671	-9999
2016	2	1	0	0	32	-9999	-0.00134806	-24.4	64	0	0.0544009	0.5	-25.5949	-2.75	-9999	-9999
2016	2	1	0	30	32	-9999	-0.000929016	-24.8	65	0	0.0532952	0.5	-20.6204	-2.83333	-9999	-9999
2016	2	1	1	0	32	-9999	-0.000509976	-25.05	66	0	0.0529062	0.5	-15.646	-2.91667	-0.000509976	-9999
2016	2	1	1	30	32	-9999	-0.0011799	-25.3	67	0	0.0525053	0.5	-29.4856	-2.91694	-9999	-9999
2016	2	1	2	0	32	-9999	-0.00119433	-25.35	68	0	0.0530478	0.5	-29.0339	-2.91721	-9999	-9999
2016	2	1	2	30	32	-9999	-0.00119433	-25.4	69	0	0.0535842	0.5	-29.0339	-2.92664	-9999	-9999
2016	2	1	3	0	32	-9999	-0.00127714	-25.55	69	0	0.0528591	0.5	-27.496	-2.93607	-9999	-9999
2016	2	1	3	30	32	-9999	-0.00136997	-25.7	69	0	0.0521428	0.5	-26.999	-2.94139	-9999	-9999
2016	2	1	4	0	32	-9999	-0.00566028	-26.25	70	0	0.050309	0.5	-69.5559	-2.94672	-0.00566028	-9999
2016	2	1	4	30	32	-9999	-0.00373831	-26.8	71	0	0.0485172	0.5	-44.9746	-2.94836	-0.00373831	-9999
2016	2	1	5	0	32	-9999	-0.00349142	-27.5	72.5	0	0.0464437	0.5	-49.2562	-2.95	-0.00349142	-9999
2016	2	1	5	30	32	-9999	-0.00238464	-28.2	74	0	0.0444209	0.5	-28.1595	-2.9515	-0.00238464	-9999
2016	2	1	6	0	32	-9999	-0.00214704	-28.8	72.5	0	0.0411476	0.5	-24.8981	-2.95301	-9999	-9999
2016	2	1	6	30	32	-9999	-0.00190944	-29.4	71	0	0.0380872	0.5	-21.6366	-2.96079	-9999	-9999
2016	2	1	7	0	32	1	-0.00167184	-28.6	72.5	0	0.0419253	0.5	-18.3752	-2.96858	-0.00167184	-9999
2016	2	1	7	30	32	1	-0.00161287	-27.8	74	0	0.0461045	0.5	-15.4834	-2.95724	-0.00161287	-9999
2016	2	1	8	0	32	1	-0.00033696	-25.25	68.5	0	0.0539246	0.5	14.0775	-2.9459	-0.00033696	-9999
2016	2	1	8	30	32	1	0.00129963	-22.7	63	0	0.0623227	0.5	70.4001	-2.94891	0.00129963	-9999
2016	2	1	9	0	32	1	0.00154075	-21.15	60.5	0	0.0685865	0.5	126.723	-2.95191	-9999	-9999
2016	2	1	9	30	32	1	0.00178187	-19.6	58	0	0.0752071	0.5	157.18	-2.95205	-9999	-9999
2016	2	1	10	0	32	1	0.00202299	-18.65	56.5	0	0.0794764	0.5	38.5886	-2.95219	0.00202299	-9999
2016	2	1	10	30	32	1	0.0161899	-17.7	55	0	0.0838707	0.5	77.5515	-2.95478	0.0161899	-9999
2016	2	1	11	0	32	1	0.00600048	-16.85	52.5	0	0.0860047	0.5	116.514	-2.95738	0.00600048	-9999
2016	2	1	11	30	32	1	0.0096542	-16	50	0	0.0879453	0.5	179.642	-2.96393	0.0096542	-9999
2016	2	1	12	0	32	1	0.0071675	-15.05	47.5	0	0.0904011	0.5	156.617	-2.97049	0.0071675	-9999
2016	2	1	12	30	32	1	0.00909758	-14.1	45	0	0.0926069	0.5	159.801	-2.97623	0.00909758	-9999
2016	2	1	13	0	32	1	0.00721119	-13.45	42.5	0	0.0922328	0.5	114.395	-2.98197	0.00721119	-9999
2016	2	1	13	30	32	1	0.0111164	-12.8	40	0	0.0915146	0.5	124.817	-2.9791	0.0111164	-9999
2016	2	1	14	0	32	1	0.00833174	-12.3	40.5	0	0.0964803	0.5	106.949	-2.97623	0.00833174	-9999
2016	2	1	14	30	32	1	0.00527926	-11.8	41	0	0.101682	0.5	64.1033	-2.98333	0.00527926	-9999
2016	2	1	15	0	32	1	0.00428328	-12.4	42	0	0.0992495	0.5	60.9155	-2.99044	0.00428328	-9999
2016	2	1	15	30	32	1	0.00506088	-13	43	0	0.0967958	0.5	39.5376	-3.00178	0.00506088	-9999
2016	2	1	16	0	32	1	0.00265291	-13.75	46	0	0.0974148	0.5	3.22218	-3.01311	-9999	-9999
2016	2	1	16	30	32	-9999	0.000244944	-14.5	49	0	0.0975813	0.5	-45.4139	-2.99604	0.000244944	-9999
2016	2	1	17	0	32	-9999	0.000187583	-15.05	50.5	0	0.0961107	0.5	-51.7281	-2.97896	0.000187583	-9999
2016	2	1	17	30	32	-9999	-0.00094284	-15.6	52	0	0.0945577	0.5	-78.0289	-2.96803	-0.00094284	-9999
2016	2	1	18	0	32	-9999	-0.00137246	-16.35	53.5	0	0.0913923	0.5	-109.17	-2.9571	-0.00137246	-9999
2016	2	1	18	30	32	-9999	-0.00106726	-17.1	55	0	0.0882264	0.5	-67.8628	-2.95492	-9999	-9999
2016	2	1	19	0	32	-9999	-0.000762048	-17.7	57	0	0.0869205	0.5	-37.1058	-2.95273	-0.000762048	-9999
2016	2	1	19	30	32	-9999	-0.00086508	-18.3	59	0	0.0855052	0.5	-51.7886	-2.94863	-9999	-9999
2016	2	1	20	0	32	-9999	-0.000968112	-18.85	61	0	0.084353	0.5	-39.3534	-2.94454	-0.000968112	-9999
2016	2	1	20	30	32	-9999	-0.0017671	-19.4	63	0	0.0831076	0.5	-45.6407	-2.93866	-0.0017671	-9999
2016	2	1	21	0	32	-9999	-0.00148975	-19.8	64	0	0.0815695	0.5	-42.1063	-2.93279	-9999	-9999
2016	2	1	21	30	32	-9999	-0.00121241	-20.2	65	0	0.0800304	0.5	-38.5719	-2.91667	-0.00121241	-9999
2016	2	1	22	0	32	-9999	-0.00162842	-20.4	66	0	0.0798661	0.5	-44.187	-2.90055	-0.00162842	-9999
2016	2	1	22	30	32	-9999	-0.00239501	-20.6	67	0	0.0796812	0.5	-44.5548	-2.8821	-0.00239501	-9999
2016	2	1	23	0	32	-9999	-0.00343265	-20.85	68.5	0	0.0797133	0.5	-55.525	-2.86366	-0.00343265	-9999
2016	2	1	23	30	32	-9999	-0.00101671	-21.1	70	0	0.0797033	0.5	-19.3537	-2.86038	-0.00101671	-9999
2016	2	2	0	0	33	-9999	-0.00115798	-21.4	71.5	0	0.079305	0.6	-18.5366	-2.8571	-9999	-9999
2016	2	2	0	30	33	-9999	-0.00129924	-21.7	73	0	0.0788684	0.6	-17.7196	-2.88133	-0.00129924	-9999
2016	2	2	1	0	33	-9999	-0.00280454	-21.9	73.5	0	0.0780263	0.6	-38.0344	-2.90556	-0.00280454	-9999
2016	2	2	1	30	33	-9999	-0.00276826	-22.1	74	0	0.077187	0.6	-45.661	-2.90592	-0.00276826	-9999
2016	2	2	2	0	33	-9999	-0.00140098	-22.25	74	0	0.0761736	0.6	-22.6427	-2.90628	-0.00140098	-9999
2016	2	2	2	30	33	-9999	-0.00152734	-22.4	74	0	0.0751721	0.6	-26.1628	-2.9168	-0.00152734	-9999
2016	2	2	3	0	33	-9999	-0.00122018	-22.45	73.5	0	0.0743352	0.6	-21.9915	-2.92732	-0.00122018	-9999
2016	2	2	3	30	33	-9999	-0.00130572	-22.5	73	0	0.0735041	0.6	-16.11	-2.93115	-0.00130572	-9999
2016	2	2	4	0	33	-9999	-0.00080352	-23.3	74	0	0.069407	0.6	-8.26187	-2.93497	-0.00080352	-9999
2016	2	2	4	30	33	-9999	-0.00206064	-24.1	75	0	0.065492	0.6	-23.0705	-2.93415	-0.00206064	-9999
2016	2	2	5	0	33	-9999	-0.00390096	-24.7	75.5	0	0.0624654	0.6	-30.1301	-2.93333	-0.00390096	-9999
2016	2	2	5	30	33	-9999	-0.00208656	-25.3	76	0	0.0595582	0.6	-12.7608	-2.93534	-0.00208656	-9999
2016	2	2	6	0	33	-9999	-0.00154291	-25.55	76	0	0.0582216	0.6	-10.5868	-2.93734	-9999	-9999
2016	2	2	6	30	33	-9999	-0.000999259	-25.8	76	0	0.056912	0.6	-8.41291	-2.94772	-9999	-9999
2016	2	2	7	0	33	1	-0.000455609	-25.9	76.5	0	0.0567666	0.6	-6.23898	-2.95811	-0.000455609	-9999
2016	2	2	7	30	33	1	-0.00069336	-26	77	0	0.0566187	0.6	12.8222	-2.94599	-0.00069336	-9999
2016	2	2	8	0	33	1	-6.2856e-05	-22.95	74.5	0	0.0720839	0.6	31.8833	-2.93388	-6.2856e-05	-9999
2016	2	2	8	30	33	1	0.000684936	-19.9	72	0	0.0909775	0.6	55.8472	-2.93502	0.000684936	-9999
2016	2	2	9	0	33	1	-0.00214708	-18.15	68	0	0.0998131	0.6	-36.615	-2.93616	-0.00214708	-9999
2016	2	2	9	30	33	1	0.000663811	-16.4	64	0	0.108873	0.6	30.1574	-2.93579	-9999	-9999
2016	2	2	10	0	33	1	0.00347471	-15.4	60.5	0	0.111855	0.6	78.9179	-2.93543	-9999	-9999
2016	2	2	10	30	33	1	0.0062856	-14.4	57	0	0.11445	0.6	127.678	-2.93889	0.0062856	-9999
2016	2	2	11	0	33	1	0.00868151	-13.25	54.5	0	0.120216	0.6	60.8513	-2.94235	0.00868151	-9999
2016	2	2	11	30	33	1	0.00651305	-12.1	52	0	0.125889	0.6	103.836	-2.94877	0.00651305	-9999
2016	2	2	12	0	33	1	0.0114464	-11.4	49	0	0.125482	0.6	76.4469	-2.95519	0.0114464	-9999
2016	2	2	12	30	33	1	0.0108218	-10.7	46	0	0.124565	0.6	112.231	-2.95779	0.0108218	-9999
2016	2	2	13	0	33	1	0.0149882	-9.8	44	0	0.127956	0.6	108.447	-2.96038	0.0149882	-9999
2016	2	2	13	30	33	1	0.0101519	-8.9	42	0	0.131094	0.6	76.5387	-2.95792	0.0101519	-9999
2016	2	2	14	0	33	1	0.0126569	-8.7	41.5	0	0.131577	0.6	63.9969	-2.95546	0.0126569	-9999
2016	2	2	14	30	33	1	0.00686886	-8.5	41	0	0.132038	0.6	72.6469	-2.96302	0.00686886	-9999
2016	2	2	15	0	33	1	0.00556632	-9.1	43	0	0.132128	0.6	45.9104	-2.97058	0.00556632	-9999
2016	2	2	15	30	33	1	0.00652795	-9.7	45	0	0.1319	0.6	19.1036	-2.9842	0.00652795	-9999
2016	2	2	16	0	33	1	0.00650312	-10.5	47.5	0	0.130688	0.6	-3.70442	-2.99781	0.00650312	-9999
2016	2	2	16	30	33	-9999	0.00226022	-11.3	50	0	0.129071	0.6	-26.5125	-2.97914	0.00226022	-9999
2016	2	2	17	0	33	-9999	-0.00088128	-11.95	52.5	0	0.128642	0.6	-49.3205	-2.96047	-0.00088128	-9999
2016	2	2	17	30	33	-9999	-0.00146124	-12.6	55	0	0.127886	0.6	-42.2105	-2.94904	-9999	-9999
2016	2	2	18	0	33	-9999	-0.0020412	-13.45	57.5	0	0.124786	0.6	-38.7021	-2.93761	-0.0020412	-9999
2016	2	2	18	30	33	-9999	-0.00290304	-14.3	60	0	0.121467	0.6	-34.4422	-2.93566	-0.00290304	-9999
2016	2	2	19	0	33	-9999	0.000163944	-15.3	63.5	0	0.118378	0.6	-19.3899	-2.9337	0.000163944	-9999
2016	2	2	19	30	33	-9999	-0.00012636	-16.3	67	0	0.114933	0.6	-14.2738	-2.92359	-0.00012636	-9999
2016	2	2	20	0	33	-9999	5.994e-05	-17.25	71.5	0	0.113255	0.6	-56.5788	-2.91348	-9999	-9999
2016	2	2	20	30	33	-9999	0.00024624	-18.2	76	0	0.111083	0.6	-45.4474	-2.90483	0.00024624	-9999
2016	2	2	21	0	33	-9999	-0.00277344	-18.9	75	0	0.10327	0.6	-34.316	-2.89617	-0.00277344	-9999
2016	2	2	21	30	33	-9999	-0.000614078	-19.6	74	0	0.0959539	0.6	-38.8418	-2.88097	-9999	-9999
2016	2	2	22	0	33	-9999	-0.000568282	-19.15	74.5	0	0.100409	0.6	-40.5555	-2.86576	-9999	-9999
2016	2	2	22	30	33	-9999	-0.000571797	-18.7	75	0	0.10505	0.6	-39.2097	-2.84813	-9999	-9999
2016	2	2	23	0	33	-9999	-0.000560089	-18.55	73.5	0	0.104275	0.6	-27.4524	-2.83051	-9999	-9999
2016	2	2	23	30	33	-9999	-0.00060264	-18.4	72	0	0.103461	0.6	-24.8327	-2.82573	-0.00060264	-9999
2016	2	3	0	0	34	-9999	-0.000600882	-19.6	74.5	0	0.0966022	0.5625	-39.2162	-2.82095	-9999	-9999
2016	2	3	0	30	34	-9999	-0.000734576	-20.8	77	0	0.0899955	0.5625	-36.5198	-2.85584	-9999	-9999
2016	2	3	1	0	34	-9999	-0.000679636	-21.5	77.5	0	0.0852109	0.5625	-34.8605	-2.89074	-9999	-9999
2016	2	3	1	30	34	-9999	-0.00155779	-22.2	78	0	0.0806457	0.5625	-16.515	-2.89109	-0.00155779	-9999
2016	2	3	2	0	34	-9999	-0.00125531	-22.8	78.5	0	0.0769712	0.5625	-21.2564	-2.89144	-0.00125531	-9999
2016	2	3	2	30	34	-9999	-0.0016362	-23.4	79	0	0.0734397	0.5625	-20.54	-2.9015	-0.0016362	-9999
2016	2	3	3	0	34	-9999	-0.000981589	-23.65	77.5	0	0.0704562	0.5625	-29.9782	-2.91157	-9999	-9999
2016	2	3	3	30	34	-9999	-0.00114504	-23.9	76	0	0.0675652	0.5625	-30.8085	-2.9194	-9999	-9999
2016	2	3	4	0	34	-9999	-0.00110347	-25.1	76	0	0.0606472	0.5625	-27.6975	-2.92723	-9999	-9999
2016	2	3	4	30	34	-9999	-0.00146703	-26.3	76	0	0.0543718	0.5625	-23.3784	-2.9275	-9999	-9999
2016	2	3	5	0	34	-9999	-0.00119316	-26.7	76	0	0.0524135	0.5625	-19.9899	-2.92778	-9999	-9999
2016	2	3	5	30	34	-9999	-0.00108885	-27.1	76	0	0.0505188	0.5625	-18.0363	-2.92895	-9999	-9999
2016	2	3	6	0	34	-9999	-0.000911817	-27.25	76	0	0.0498243	0.5625	-18.0949	-2.93012	-9999	-9999
2016	2	3	6	30	34	-9999	-0.000911817	-27.4	76	0	0.0491384	0.5625	-16.7694	-2.93617	-9999	-9999
2016	2	3	7	0	34	1	0.00202176	-27.05	75.5	0	0.0504183	0.5625	7.10322	-2.94223	0.00202176	-9999
2016	2	3	7	30	34	1	-0.000727056	-26.7	75	0	0.0517238	0.5625	-0.705316	-2.92963	-0.000727056	-9999
2016	2	3	8	0	34	1	0.00154418	-24.6	76	0	0.0634485	0.5625	30.7192	-2.91703	0.00154418	-9999
2016	2	3	8	30	34	1	0.0016861	-22.5	77	0	0.0775317	0.5625	36.7009	-2.91664	0.0016861	-9999
2016	2	3	9	0	34	1	-0.00029808	-20.1	69.5	0	0.0863144	0.5625	-11.3205	-2.91624	-0.00029808	-9999
2016	2	3	9	30	34	1	-0.00481658	-17.7	62	0	0.0945451	0.5625	-37.8898	-2.91644	-0.00481658	-9999
2016	2	3	10	0	34	1	-0.000324	-15	59.5	0	0.113708	0.5625	-0.694616	-2.91664	-0.000324	-9999
2016	2	3	10	30	34	1	0.0117205	-12.3	57	0	0.135787	0.5625	102.822	-2.91934	0.0117205	-9999
2016	2	3	11	0	34	1	0.00815184	-10.5	52	0	0.143069	0.5625	81.9278	-2.92204	0.00815184	-9999
2016	2	3	11	30	34	1	0.00381672	-8.7	47	0	0.149015	0.5625	90.7812	-2.92814	0.00381672	-9999
2016	2	3	12	0	34	1	0.00484704	-8.35	45.5	0	0.148254	0.5625	99.6346	-2.93424	0.00484704	-9999
2016	2	3	12	30	34	1	0.00421848	-8	44	0	0.147325	0.5625	108.488	-2.93852	0.00421848	-9999
2016	2	3	13	0	34	1	0.0117731	-7.2	43	0	0.153179	0.5625	159.133	-2.94281	0.0117731	-9999
2016	2	3	13	30	34	1	0.0120218	-6.4	42	0	0.159111	0.5625	41.5365	-2.94171	0.0120218	-9999
2016	2	3	14	0	34	1	0.0122552	-6.1	40	0	0.155054	0.5625	109.823	-2.94062	-9999	-9999
2016	2	3	14	30	34	1	0.0124886	-5.8	38	0	0.150715	0.5625	68.1078	-2.94619	0.0124886	-9999
2016	2	3	15	0	34	1	0.00132192	-6.8	40.5	0	0.148788	0.5625	43.669	-2.95176	0.00132192	-9999
2016	2	3	15	30	34	1	0.00312206	-7.8	43	0	0.14623	0.5625	19.2301	-2.96759	0.00312206	-9999
2016	2	3	16	0	34	1	-1.4256e-05	-9.1	48.5	0	0.149028	0.5625	-18.3223	-2.98342	-1.4256e-05	-9999
2016	2	3	16	30	34	-9999	0.00371074	-10.4	54	0	0.149756	0.5625	7.95938	-2.96495	-9999	-9999
2016	2	3	17	0	34	-9999	0.00394681	-12	59	0	0.143989	0.5625	6.90877	-2.94648	-9999	-9999
2016	2	3	17	30	34	-9999	0.00416563	-13.6	64	0	0.137204	0.5625	-2.07497	-2.93862	-9999	-9999
2016	2	3	18	0	34	-9999	0.00392241	-14.5	67	0	0.133427	0.5625	-2.7427	-2.93075	-9999	-9999
2016	2	3	18	30	34	-9999	0.00295345	-15.4	70	0	0.129419	0.5625	-16.155	-2.92705	-9999	-9999
2016	2	3	19	0	34	-9999	0.00239981	-15.8	74.5	0	0.133239	0.5625	-20.37	-2.92335	-9999	-9999
2016	2	3	19	30	34	-9999	0.00258274	-16.2	79	0	0.136655	0.5625	-24.3351	-2.91301	-9999	-9999
2016	2	3	20	0	34	-9999	5.23644e-05	-17.5	79.5	0	0.123298	0.5625	-33.3364	-2.90267	-9999	-9999
2016	2	3	20	30	34	-9999	-0.000904053	-18.8	80	0	0.111101	0.5625	-38.6783	-2.89742	-9999	-9999
2016	2	3	21	0	34	-9999	-0.000923979	-20	79.5	0	0.0995907	0.5625	-36.1594	-2.89217	-9999	-9999
2016	2	3	21	30	34	-9999	-0.00089411	-21.2	79	0	0.0891691	0.5625	-34.6411	-2.87257	-9999	-9999
2016	2	3	22	0	34	-9999	-0.000829098	-21.05	80.5	0	0.0920594	0.5625	-32.8334	-2.85298	-9999	-9999
2016	2	3	22	30	34	-9999	-0.000859237	-20.9	82	0	0.0950087	0.5625	-33.0186	-2.83508	-9999	-9999
2016	2	3	23	0	34	-9999	-0.00090974	-21.85	79	0	0.0842342	0.5625	-31.5968	-2.81718	-9999	-9999
2016	2	3	23	30	34	-9999	-0.00101828	-22.8	76	0	0.0745199	0.5625	-30.5619	-2.81327	-9999	-9999
2016	2	4	0	0	35	-9999	-0.000932093	-23.4	75.5	0	0.070186	0.525	-28.7409	-2.80935	-9999	-9999
2016	2	4	0	30	35	-9999	-0.00121919	-24	75	0	0.0660817	0.525	-28.9295	-2.85684	-9999	-9999
2016	2	4	1	0	35	-9999	-0.00111567	-24.25	76	0	0.0654778	0.525	-28.4696	-2.90432	-9999	-9999
2016	2	4	1	30	35	-9999	-0.00126461	-24.5	77	0	0.0648648	0.525	-28.7485	-2.90465	-9999	-9999
2016	2	4	2	0	35	-9999	-0.00118791	-25.2	75.5	0	0.0597051	0.525	-25.8902	-2.90498	-9999	-9999
2016	2	4	2	30	35	-9999	-0.00145776	-25.9	74	0	0.0549115	0.525	-25.2811	-2.91498	-9999	-9999
2016	2	4	3	0	35	-9999	-0.00145776	-26	75	0	0.0551481	0.525	-25.2811	-2.92498	-9999	-9999
2016	2	4	3	30	35	-9999	-0.00148385	-26.1	76	0	0.0553754	0.525	-23.1951	-2.93065	-9999	-9999
2016	2	4	4	0	35	-9999	-0.00145776	-26.05	75.5	0	0.0552629	0.525	-25.2811	-2.93631	-9999	-9999
2016	2	4	4	30	35	-9999	-0.00145776	-26	75	0	0.0551481	0.525	-25.2811	-2.93667	-9999	-9999
2016	2	4	5	0	35	-9999	-0.00149081	-26.3	74.5	0	0.0532987	0.525	-23.0023	-2.93704	-9999	-9999
2016	2	4	5	30	35	-9999	-0.00109857	-26.6	74	0	0.051505	0.525	-19.9899	-2.9386	-9999	-9999
2016	2	4	6	0	35	-9999	-0.00120498	-25.3	76.5	0	0.05995	0.525	-25.7516	-2.94015	-9999	-9999
2016	2	4	6	30	35	-9999	-0.00519696	-24	79	0	0.0696061	0.525	-26.1457	-2.94823	-0.00519696	-9999
2016	2	4	7	0	35	1	-0.00290628	-20.25	78	0	0.0956218	0.525	-16.512	-2.9563	-0.00290628	-9999
2016	2	4	7	30	35	1	-0.00294192	-16.5	77	0	0.129896	0.525	-19.7456	-2.94429	-0.00294192	-9999
2016	2	4	8	0	35	1	0.00157756	-16.05	75	0	0.131369	0.525	-11.0612	-2.93227	-9999	-9999
2016	2	4	8	30	35	1	0.00609703	-15.6	73	0	0.132744	0.525	-9.46334	-2.93352	0.00609703	-9999
2016	2	4	9	0	35	1	0.00698183	-15.25	70.5	0	0.131973	0.525	-9.11981	-2.93477	0.00698183	-9999
2016	2	4	9	30	35	1	0.0114739	-14.9	68	0	0.131029	0.525	-8.77629	-2.93476	0.0114739	-9999
2016	2	4	10	0	35	1	0.0184786	-14.8	71	0	0.137943	0.525	59.022	-2.93475	0.0184786	-9999
2016	2	4	10	30	35	1	0.0216744	-14.7	74	0	0.144962	0.525	45.1272	-2.93767	0.0216744	-9999
2016	2	4	11	0	35	1	0.00403126	-14.3	73.5	0	0.148797	0.525	4.91283	-2.94059	-9999	-9999
2016	2	4	11	30	35	1	0.00428135	-13.9	73	0.1	0.152709	0.525	5.53161	-2.94695	-9999	-9999
2016	2	4	12	0	35	1	0.00448548	-13.55	71	0	0.152832	0.525	8.88938	-2.95331	-9999	-9999
2016	2	4	12	30	35	1	0.0155168	-13.2	69	0	0.152821	0.525	61.3234	-2.95751	0.0155168	-9999
2016	2	4	13	0	35	1	0.0298849	-13.05	67.5	0	0.151331	0.525	72.1916	-2.96172	0.0298849	-9999
2016	2	4	13	30	35	1	0.0208084	-12.9	66	0	0.14978	0.525	83.0598	-2.95958	0.0208084	-9999
2016	2	4	14	0	35	1	0.0113729	-12.75	64.5	0	0.148166	0.525	82.6221	-2.95744	0.0113729	-9999
2016	2	4	14	30	35	1	0.00173016	-12.6	63	0	0.146488	0.525	64.1401	-2.96418	0.00173016	-9999
2016	2	4	15	0	35	1	0.00572832	-12.75	63	0	0.14472	0.525	57.659	-2.97093	0.00572832	-9999
2016	2	4	15	30	35	1	0.006409	-12.9	63	0	0.142972	0.525	28.3541	-2.98452	0.006409	-9999
2016	2	4	16	0	35	1	0.000819072	-13.3	64	0	0.140598	0.525	-1.6415	-2.99812	0.000819072	-9999
2016	2	4	16	30	35	-9999	0.00373896	-13.7	65	0	0.138215	0.525	-3.23758	-2.98004	0.00373896	-9999
2016	2	4	17	0	35	-9999	-0.000352405	-13.9	69.5	0	0.145387	0.525	-11.6895	-2.96197	-9999	-9999
2016	2	4	17	30	35	-9999	-0.00444377	-14.1	74	0	0.152287	0.525	-20.1414	-2.9519	-0.00444377	-9999
2016	2	4	18	0	35	-9999	0.0157795	-14.85	76.5	0	0.148017	0.525	-20.6618	-2.94182	0.0157795	-9999
2016	2	4	18	30	35	-9999	-0.00104923	-15.6	79	0	0.143655	0.525	-5.27425	-2.93921	-0.00104923	-9999
2016	2	4	19	0	35	-9999	0.00236516	-15.85	78.5	0	0.13981	0.525	-19.9485	-2.93659	-9999	-9999
2016	2	4	19	30	35	-9999	0.00252073	-16.1	78	0.1	0.136056	0.525	-21.4535	-2.92841	-9999	-9999
2016	2	4	20	0	35	-9999	0.00255989	-17.05	79.5	0	0.128065	0.525	-23.8846	-2.92023	-9999	-9999
2016	2	4	20	30	35	-9999	-0.000490992	-18	81	0	0.120419	0.525	-29.1088	-2.91364	-9999	-9999
2016	2	4	21	0	35	-9999	-0.000581197	-19.5	79.5	0	0.103976	0.525	-38.6244	-2.90704	-9999	-9999
2016	2	4	21	30	35	-9999	0.000894043	-21	78	0	0.0895901	0.525	-41.0309	-2.89007	0.000894043	-9999
2016	2	4	22	0	35	-9999	-0.000936845	-21.95	78.5	0	0.0829687	0.525	-29.5193	-2.87309	-9999	-9999
2016	2	4	22	30	35	-9999	-0.00103118	-22.9	79	0	0.0767778	0.525	-29.8058	-2.85511	-9999	-9999
2016	2	4	23	0	35	-9999	-0.00121919	-24	77	0	0.0678439	0.525	-28.9295	-2.83712	-9999	-9999
2016	2	4	23	30	35	-9999	-0.00118791	-25.1	75	0	0.0598493	0.525	-25.8902	-2.83313	-9999	-9999
2016	2	5	0	0	36	-9999	-0.00129898	-25.5	75.5	0	0.058102	0.4875	-24.1301	-2.82913	-9999	-9999
2016	2	5	0	30	36	-9999	-0.00145776	-25.9	76	0	0.0563956	0.4875	-25.2811	-2.86467	-9999	-9999
2016	2	5	1	0	36	-9999	-0.00149081	-26.3	76	0	0.0543718	0.4875	-23.0023	-2.90021	-9999	-9999
2016	2	5	1	30	36	-9999	-0.00119316	-26.7	76	0	0.0524135	0.4875	-19.9899	-2.90055	-9999	-9999
2016	2	5	2	0	36	-9999	-0.0010891	-27.8	74.5	0	0.046416	0.4875	-15.968	-2.9009	-9999	-9999
2016	2	5	2	30	36	-9999	-0.000676413	-28.9	73	0	0.0410448	0.4875	-9.9218	-2.9111	-9999	-9999
2016	2	5	3	0	36	-9999	-0.000953294	-28.7	73.5	0	0.0421077	0.4875	-14.1814	-2.92129	-9999	-9999
2016	2	5	3	30	36	-9999	-0.00101013	-28.5	74	0	0.0431947	0.4875	-16.9631	-2.92706	-9999	-9999
2016	2	5	4	0	36	-9999	-0.000655424	-29.45	72.5	0	0.038709	0.4875	-7.57305	-2.93284	-9999	-9999
2016	2	5	4	30	36	-9999	-0.000452333	-30.4	71	0	0.0346463	0.4875	-9.72769	-2.93278	-9999	-9999
2016	2	5	5	0	36	-9999	-0.000138524	-30.8	71.5	0	0.0335851	0.4875	0.0470238	-2.93272	-9999	-9999
2016	2	5	5	30	36	-9999	-0.000268871	-31.2	72	0	0.03255	0.4875	-4.88854	-2.93429	-9999	-9999
2016	2	5	6	0	36	-9999	-0.000956399	-31.45	71.5	0	0.0315576	0.4875	-9.1063	-2.93587	-9999	-9999
2016	2	5	6	30	36	-9999	-0.000884117	-31.7	71	0	0.0305922	0.4875	-9.1063	-2.94404	-9999	-9999
2016	2	5	7	0	36	1	-0.000163771	-30.8	73	0	0.0342896	0.4875	-10.3061	-2.95221	-9999	-9999
2016	2	5	7	30	36	1	-0.00307152	-29.9	75	0	0.0383769	0.4875	-15.3882	-2.93997	-0.00307152	-9999
2016	2	5	8	0	36	1	0.000409666	-26.25	76	0	0.0546212	0.4875	7.1523	-2.92773	0.000409666	-9999
2016	2	5	8	30	36	1	0.000212738	-22.6	77	0	0.0768492	0.4875	4.51081	-2.92839	0.000212738	-9999
2016	2	5	9	0	36	1	0.000292637	-19.6	68.5	0	0.0888222	0.4875	-12.488	-2.92906	0.000292637	-9999
2016	2	5	9	30	36	1	0.00390744	-16.6	60	0	0.100374	0.4875	9.01754	-2.929	0.00390744	-9999
2016	2	5	10	0	36	1	0.0102934	-15.7	51	0	0.0919721	0.4875	58.4258	-2.92894	-9999	-9999
2016	2	5	10	30	36	1	0.0166794	-14.8	42	0	0.0816002	0.4875	148.157	-2.93197	0.0166794	-9999
2016	2	5	11	0	36	1	0.0216224	-13.7	38.5	0	0.0818656	0.4875	183.943	-2.93499	0.0216224	-9999
2016	2	5	11	30	36	1	0.016117	-12.6	35	0	0.0813821	0.4875	206.48	-2.94129	0.016117	-9999
2016	2	5	12	0	36	1	0.0122047	-11.75	34.5	0	0.0859057	0.4875	152.082	-2.94758	0.0122047	-9999
2016	2	5	12	30	36	1	0.00947306	-10.9	34	0	0.0906158	0.4875	194.01	-2.95128	0.00947306	-9999
2016	2	5	13	0	36	1	0.0125612	-10.85	32.5	0	0.0869638	0.4875	138.962	-2.95497	0.0125612	-9999
2016	2	5	13	30	36	1	0.0124451	-10.8	31	0	0.083281	0.4875	157.907	-2.95307	0.0124451	-9999
2016	2	5	14	0	36	1	0.0113174	-10.8	30.5	0	0.0819377	0.4875	97.4885	-2.95117	0.0113174	-9999
2016	2	5	14	30	36	1	0.013793	-10.8	30	0	0.0805945	0.4875	138.456	-2.9578	0.013793	-9999
2016	2	5	15	0	36	1	0.00967118	-11.25	31	0	0.0803447	0.4875	91.5831	-2.96442	0.00967118	-9999
2016	2	5	15	30	36	1	0.00903159	-11.7	32	0	0.0800011	0.4875	47.8984	-2.97877	0.00903159	-9999
2016	2	5	16	0	36	1	0.00896103	-12.45	33.5	0	0.0788443	0.4875	16.5507	-2.99312	0.00896103	-9999
2016	2	5	16	30	36	-9999	0.00164592	-13.2	35	0	0.0775177	0.4875	1.80367	-2.97471	0.00164592	-9999
2016	2	5	17	0	36	-9999	0.00330286	-13.6	35.5	0	0.0761051	0.4875	-3.13727	-2.95631	0.00330286	-9999
2016	2	5	17	30	36	-9999	0.00426125	-14	36	0	0.0746948	0.4875	-4.96673	-2.94652	0.00426125	-9999
2016	2	5	18	0	36	-9999	0.00259654	-14.65	40	0	0.078681	0.4875	-9.00787	-2.93673	0.00259654	-9999
2016	2	5	18	30	36	-9999	0.00276113	-15.3	44	0	0.0820259	0.4875	-13.049	-2.93397	0.00276113	-9999
2016	2	5	19	0	36	-9999	0.00202059	-15.35	46.5	0	0.0863282	0.4875	-17.0902	-2.93121	0.00202059	-9999
2016	2	5	19	30	36	-9999	0.00115668	-15.4	49	0	0.0905933	0.4875	-14.5413	-2.92167	0.00115668	-9999
2016	2	5	20	0	36	-9999	0.00254107	-16.75	56	0	0.0925115	0.4875	-24.7136	-2.91213	-9999	-9999
2016	2	5	20	30	36	-9999	-0.000756608	-18.1	63	0	0.0928674	0.4875	-28.9212	-2.90529	-9999	-9999
2016	2	5	21	0	36	-9999	-0.000495684	-19.4	66.5	0	0.0877246	0.4875	-32.1713	-2.89846	-9999	-9999
2016	2	5	21	30	36	-9999	-0.000914533	-20.7	70	0	0.0825288	0.4875	-29.181	-2.8812	-9999	-9999
2016	2	5	22	0	36	-9999	-0.00106504	-22.1	71.5	0	0.0745793	0.4875	-28.2082	-2.86394	-9999	-9999
2016	2	5	22	30	36	-9999	-0.00112304	-23.5	73	0	0.0672597	0.4875	-26.5457	-2.84611	-9999	-9999
2016	2	5	23	0	36	-9999	-0.00128659	-23.9	75	0	0.0666762	0.4875	-27.645	-2.82827	-9999	-9999
2016	2	5	23	30	36	-9999	-0.00130856	-24.3	77	0	0.0660421	0.4875	-27.2868	-2.82404	-9999	-9999
2016	2	6	0	0	37	-9999	-0.00118771	-24.95	76.5	0	0.0618802	0.45	-23.686	-2.81981	-9999	-9999
2016	2	6	0	30	37	-9999	-0.00130579	-25.6	76	0	0.0579575	0.45	-24.7378	-2.85912	-9999	-9999
2016	2	6	1	0	37	-9999	-0.00145776	-25.9	77	0	0.0571376	0.45	-25.2811	-2.89842	-9999	-9999
2016	2	6	1	30	37	-9999	-0.00149081	-26.2	78	0	0.0563155	0.45	-23.0023	-2.89876	-9999	-9999
2016	2	6	2	0	37	-9999	-0.00105679	-27.05	76	0	0.0507522	0.45	-19.2288	-2.89911	-9999	-9999
2016	2	6	2	30	37	-9999	-0.000964275	-27.9	74	0	0.0456783	0.45	-16.1971	-2.90919	-9999	-9999
2016	2	6	3	0	37	-9999	-0.000964275	-28.35	73.5	0	0.043508	0.45	-16.1971	-2.91928	-9999	-9999
2016	2	6	3	30	37	-9999	-0.000719499	-28.8	73	0	0.0414314	0.45	-12.5803	-2.9257	-9999	-9999
2016	2	6	4	0	37	-9999	-0.000934222	-29.6	71.5	0	0.0376386	0.45	-12.4875	-2.93213	-9999	-9999
2016	2	6	4	30	37	-9999	-0.000510494	-30.4	70	0	0.0341583	0.45	-16.0694	-2.93232	-9999	-9999
2016	2	6	5	0	37	-9999	-0.000632981	-30.25	72	0	0.0356389	0.45	-15.9717	-2.93251	-9999	-9999
2016	2	6	5	30	37	-9999	-0.000632981	-30.1	74	0	0.0371542	0.45	-15.9717	-2.93394	-9999	-9999
2016	2	6	6	0	37	-9999	-0.000510494	-30.5	73	0	0.0352848	0.45	-16.0694	-2.93538	-9999	-9999
2016	2	6	6	30	37	-9999	-0.000443917	-30.9	72	0	0.0334983	0.45	-12.8809	-2.94281	-9999	-9999
2016	2	6	7	0	37	1	0.00028512	-30.3	73	0	0.0359626	0.45	-15.9717	-2.95025	0.00028512	-9999
2016	2	6	7	30	37	1	0.000273197	-29.7	74	0	0.0385884	0.45	-12.4875	-2.93796	0.000273197	-9999
2016	2	6	8	0	37	1	0.000353354	-27.2	74.5	0	0.0490669	0.45	18.4088	-2.92568	-9999	-9999
2016	2	6	8	30	37	1	0.000433512	-24.7	75	0	0.0620518	0.45	10.4501	-2.92618	0.000433512	-9999
2016	2	6	9	0	37	1	0.00194854	-20.9	68.5	0	0.079367	0.45	41.281	-2.92669	0.00194854	-9999
2016	2	6	9	30	37	1	0.00127883	-17.1	62	0	0.0994552	0.45	30.8967	-2.92673	-9999	-9999
2016	2	6	10	0	37	1	0.00060912	-15.7	57.5	0	0.103694	0.45	20.5124	-2.92677	0.00060912	-9999
2016	2	6	10	30	37	1	-0.00242545	-14.3	53	0	0.107296	0.45	190.718	-2.92966	-9999	-9999
2016	2	6	11	0	37	1	-0.00546002	-13.15	50.5	0	0.112302	0.45	69.2126	-2.93254	-0.00546002	-9999
2016	2	6	11	30	37	1	0.00236856	-12	48	0	0.117144	0.45	31.7563	-2.93879	-9999	-9999
2016	2	6	12	0	37	1	0.0101971	-11.65	47	0	0.117974	0.45	60.1249	-2.94504	0.0101971	-9999
2016	2	6	12	30	37	1	0.0105495	-11.3	46	0	0.118746	0.45	133.002	-2.9491	0.0105495	-9999
2016	2	6	13	0	37	1	0.0089706	-10.15	43.5	0	0.12305	0.45	116.517	-2.95316	-9999	-9999
2016	2	6	13	30	37	1	0.00739168	-9	41	0	0.126975	0.45	119.348	-2.95145	0.00739168	-9999
2016	2	6	14	0	37	1	0.0122646	-8.5	40.5	0	0.130428	0.45	75.911	-2.94974	0.0122646	-9999
2016	2	6	14	30	37	1	0.00742608	-8	40	0	0.133932	0.45	88.0581	-2.95606	0.00742608	-9999
2016	2	6	15	0	37	1	0.0139857	-8.35	42.5	0	0.138479	0.45	163.987	-2.96237	0.0139857	-9999
2016	2	6	15	30	37	1	0.0106159	-8.7	45	0	0.142674	0.45	60.9031	-2.97696	0.0106159	-9999
2016	2	6	16	0	37	1	0.00730944	-9.2	46.5	0	0.141766	0.45	4.21724	-2.99155	0.00730944	-9999
2016	2	6	16	30	37	-9999	0.00796392	-9.7	48	0	0.140694	0.45	12.2131	-2.97324	0.00796392	-9999
2016	2	6	17	0	37	-9999	0.00498312	-10.4	50	0	0.138663	0.45	9.02642	-2.95492	0.00498312	-9999
2016	2	6	17	30	37	-9999	0.00685584	-11.1	52	0	0.136396	0.45	8.13289	-2.94568	0.00685584	-9999
2016	2	6	18	0	37	-9999	0.00536844	-11.9	55	0	0.135311	0.45	7.23936	-2.93644	0.00536844	-9999
2016	2	6	18	30	37	-9999	0.00262428	-12.7	58	0	0.133775	0.45	27.0932	-2.93341	-9999	-9999
2016	2	6	19	0	37	-9999	-0.00011988	-12.85	59.5	0	0.135578	0.45	-1.50991	-2.93038	-0.00011988	-9999
2016	2	6	19	30	37	-9999	-0.00125038	-13	61	0	0.137315	0.45	-1.55038	-2.92103	-0.00125038	-9999
2016	2	6	20	0	37	-9999	-0.00092664	-13.1	62.5	0	0.139554	0.45	-1.55038	-2.91168	-0.00092664	-9999
2016	2	6	20	30	37	-9999	-0.00216432	-13.2	64	0	0.141747	0.45	-3.553	-2.90545	-0.00216432	-9999
2016	2	6	21	0	37	-9999	-0.00110808	-13.3	64.5	0	0.141697	0.45	-6.84169	-2.89922	-0.00110808	-9999
2016	2	6	21	30	37	-9999	-0.00056376	-13.4	65	0	0.141638	0.45	-4.59698	-2.88128	-0.00056376	-9999
2016	2	6	22	0	37	-9999	-0.00184032	-13.7	66.5	0	0.141404	0.45	-12.9276	-2.86334	-0.00184032	-9999
2016	2	6	22	30	37	-9999	-0.00218246	-14	68	0	0.14109	0.45	-21.2583	-2.84543	-0.00218246	-9999
2016	2	6	23	0	37	-9999	-0.00189138	-14.7	70.5	0	0.138105	0.45	-24.9503	-2.82752	-0.00189138	-9999
2016	2	6	23	30	37	-9999	0.00287875	-15.4	73	0	0.134966	0.45	-14.9603	-2.82348	-9999	-9999
2016	2	7	0	0	38	-9999	0.00353165	-15.05	72	0	0.137029	0.3875	-5.82033	-2.81943	-9999	-9999
2016	2	7	0	30	38	-9999	0.00369462	-14.7	71	0	0.139085	0.3875	-5.12994	-2.86021	-9999	-9999
2016	2	7	1	0	38	-9999	-0.00060912	-15.75	70.5	0	0.12661	0.3875	-28.0985	-2.90098	-0.00060912	-9999
2016	2	7	1	30	38	-9999	5.832e-05	-16.8	70	0	0.115155	0.3875	-25.3661	-2.90132	-9999	-9999
2016	2	7	2	0	38	-9999	0.00072576	-17.4	66	0	0.103229	0.3875	-22.6336	-2.90166	0.00072576	-9999
2016	2	7	2	30	38	-9999	0.00087048	-18	62	0	0.0921723	0.3875	-65.001	-2.91176	-9999	-9999
2016	2	7	3	0	38	-9999	0.0010152	-19.05	60.5	0	0.0822421	0.3875	-86.4995	-2.92185	-9999	-9999
2016	2	7	3	30	38	-9999	0.00115992	-20.1	59	0	0.0732741	0.3875	-30.6083	-2.9278	0.00115992	-9999
2016	2	7	4	0	38	-9999	0.00245316	-20.95	59.5	0	0.0686396	0.3875	-27.0473	-2.93376	0.00245316	-9999
2016	2	7	4	30	38	-9999	0.00193104	-21.8	60	0	0.0642569	0.3875	-25.7273	-2.93392	0.00193104	-9999
2016	2	7	5	0	38	-9999	-0.000972	-22.6	60.5	0	0.0603815	0.3875	-42.1923	-2.93409	-0.000972	-9999
2016	2	7	5	30	38	-9999	0.00115344	-23.4	61	0	0.0567066	0.3875	-31.7833	-2.93561	0.00115344	-9999
2016	2	7	6	0	38	-9999	0.00088776	-24.15	63	0	0.0547671	0.3875	-36.2064	-2.93713	0.00088776	-9999
2016	2	7	6	30	38	-9999	-3.564e-05	-24.9	65	0	0.052816	0.3875	-40.6296	-2.94503	-9999	-9999
2016	2	7	7	0	38	1	-0.00095904	-24.1	61.5	0	0.0537035	0.3875	-13.2694	-2.95292	-0.00095904	-9999
2016	2	7	7	30	38	1	-0.000323352	-23.3	58	0	0.0544001	0.3875	-20.4163	-2.94074	-0.000323352	-9999
2016	2	7	8	0	38	1	0.00044712	-22.45	53.5	0	0.0541079	0.3875	18.016	-2.92856	0.00044712	-9999
2016	2	7	8	30	38	1	0.00065448	-21.6	49	0	0.0534053	0.3875	31.9349	-2.92937	0.00065448	-9999
2016	2	7	9	0	38	1	0.00032076	-21	45	0	0.0516866	0.3875	80.7986	-2.93017	-9999	-9999
2016	2	7	9	30	38	1	-1.296e-05	-20.4	41	0	0.0496138	0.3875	127.031	-2.93016	-1.296e-05	-9999
2016	2	7	10	0	38	1	0.00289245	-19.7	40	0	0.0514223	0.3875	100.494	-2.93015	-9999	-9999
2016	2	7	10	30	38	1	0.00579786	-19	39	0	0.053243	0.3875	224.475	-2.9331	-9999	-9999
2016	2	7	11	0	38	1	0.00870327	-18.35	37.5	0	0.0541158	0.3875	231.442	-2.93604	0.00870327	-9999
2016	2	7	11	30	38	1	0.00539006	-17.7	36	0	0.0548972	0.3875	94.5118	-2.94234	0.00539006	-9999
2016	2	7	12	0	38	1	0.00611436	-17.05	33	0	0.053159	0.3875	152.404	-2.94865	0.00611436	-9999
2016	2	7	12	30	38	1	0.0142842	-16.4	30	0	0.0510342	0.3875	268.992	-2.95263	0.0142842	-9999
2016	2	7	13	0	38	1	0.0104936	-15.9	28	0	0.0496613	0.3875	179.716	-2.95662	0.0104936	-9999
2016	2	7	13	30	38	1	0.0148204	-15.4	26	0	0.0480699	0.3875	191.602	-2.9547	0.0148204	-9999
2016	2	7	14	0	38	1	0.0121097	-15.5	27.5	0	0.0504233	0.3875	159.698	-2.95279	-9999	-9999
2016	2	7	14	30	38	1	0.00939902	-15.6	29	0	0.0527341	0.3875	77.7538	-2.95935	0.00939902	-9999
2016	2	7	15	0	38	1	0.00504792	-16.25	32.5	0	0.0559845	0.3875	70.3238	-2.96591	0.00504792	-9999
2016	2	7	15	30	38	1	0.0033348	-16.9	36	0	0.0587275	0.3875	-1.11439	-2.98009	0.0033348	-9999
2016	2	7	16	0	38	1	0.0020736	-17.15	35.5	0	0.0567069	0.3875	-21.0359	-2.99426	0.0020736	-9999
2016	2	7	16	30	38	-9999	0.000760424	-17.4	35	0	0.0547425	0.3875	-31.1812	-2.976	-9999	-9999
2016	2	7	17	0	38	-9999	0.00031078	-17.7	37	0	0.0564221	0.3875	-28.9988	-2.95773	-9999	-9999
2016	2	7	17	30	38	-9999	-0.000390718	-18	39	0	0.0579794	0.3875	-30.0561	-2.94803	-9999	-9999
2016	2	7	18	0	38	-9999	-0.000620159	-18.1	39	0	0.0574894	0.3875	-30.1314	-2.93833	-9999	-9999
2016	2	7	18	30	38	-9999	-0.000635579	-18.2	39	0	0.057003	0.3875	-30.3936	-2.93553	-9999	-9999
2016	2	7	19	0	38	-9999	-0.000569104	-18.55	39.5	0	0.0560391	0.3875	-31.5131	-2.93273	-9999	-9999
2016	2	7	19	30	38	-9999	-0.00057245	-18.9	40	0	0.0550775	0.3875	-29.8842	-2.9237	-9999	-9999
2016	2	7	20	0	38	-9999	-0.00050927	-19.25	40.5	0	0.0541188	0.3875	-33.0489	-2.91468	-9999	-9999
2016	2	7	20	30	38	-9999	-0.00050409	-19.6	41	0	0.0531636	0.3875	-32.0867	-2.90813	-9999	-9999
2016	2	7	21	0	38	-9999	-0.00241056	-19.95	43.5	0	0.0547289	0.3875	26.7071	-2.90158	-0.00241056	-9999
2016	2	7	21	30	38	-9999	-0.000827493	-20.3	46	0	0.0561487	0.3875	-31.2253	-2.88418	-9999	-9999
2016	2	7	22	0	38	-9999	-0.000827493	-20.4	46	0	0.0556642	0.3875	-30.6474	-2.86679	-9999	-9999
2016	2	7	22	30	38	-9999	-0.000827493	-20.5	46	0	0.0551835	0.3875	-29.6932	-2.84888	-9999	-9999
2016	2	7	23	0	38	-9999	-0.000827493	-20.45	46	0	0.0554234	0.3875	-30.6474	-2.83097	-9999	-9999
2016	2	7	23	30	38	-9999	-0.000827493	-20.4	46	0	0.0556642	0.3875	-30.6474	-2.82688	-9999	-9999
2016	2	8	0	0	39	-9999	-0.000827493	-20.35	45.5	0	0.0552983	0.325	-31.2253	-2.82279	-9999	-9999
2016	2	8	0	30	39	-9999	-0.000827493	-20.3	45	0	0.0549281	0.325	-31.2253	-2.86133	-9999	-9999
2016	2	8	1	0	39	-9999	-0.000827493	-20.4	53.5	0	0.0647399	0.325	-30.6474	-2.89987	-9999	-9999
2016	2	8	1	30	39	-9999	-0.000827493	-20.5	62	0	0.0743778	0.325	-29.6932	-2.90021	-9999	-9999
2016	2	8	2	0	39	-9999	-0.000819565	-20.55	63.5	0	0.0758473	0.325	-29.6819	-2.90056	-9999	-9999
2016	2	8	2	30	39	-9999	-0.000819565	-20.6	65	0	0.0773027	0.325	-29.6819	-2.91068	-9999	-9999
2016	2	8	3	0	39	-9999	-0.000859207	-20.7	66	0	0.0778128	0.325	-29.12	-2.92081	-9999	-9999
2016	2	8	3	30	39	-9999	-0.000859207	-20.8	67	0	0.0783078	0.325	-28.5073	-2.92686	-9999	-9999
2016	2	8	4	0	39	-9999	-0.000827493	-20.45	65	0	0.0783157	0.325	-30.6474	-2.93291	-9999	-9999
2016	2	8	4	30	39	-9999	-0.000807563	-20.1	63	0	0.0782418	0.325	-31.3648	-2.93301	-9999	-9999
2016	2	8	5	0	39	-9999	-0.00064005	-19.8	63	0	0.080295	0.325	-30.2676	-2.9331	-9999	-9999
2016	2	8	5	30	39	-9999	-0.00050409	-19.5	63	0	0.0823963	0.325	-33.2047	-2.93462	-9999	-9999
2016	2	8	6	0	39	-9999	-0.00050409	-19.6	68.5	0	0.0888222	0.325	-32.0867	-2.93613	-9999	-9999
2016	2	8	6	30	39	-9999	-0.000582164	-19.7	74	0	0.0951312	0.325	-32.5109	-2.94396	-9999	-9999
2016	2	8	7	0	39	1	-0.0005785	-19.3	73	0	0.0971298	0.325	9.53729	-2.95179	-9999	-9999
2016	2	8	7	30	39	1	-0.00057245	-18.9	72	0	0.0991395	0.325	29.7747	-2.93956	-9999	-9999
2016	2	8	8	0	39	1	8.79989e-05	-17.75	70	0	0.106294	0.325	50.012	-2.92732	-9999	-9999
2016	2	8	8	30	39	1	0.00256271	-16.6	68	0	0.113757	0.325	70.2494	-2.92798	-9999	-9999
2016	2	8	9	0	39	1	0.00731267	-15.75	66.5	0	0.119427	0.325	80.3346	-2.92864	-9999	-9999
2016	2	8	9	30	39	1	0.011795	-14.9	65	0	0.125249	0.325	90.4198	-2.92863	-9999	-9999
2016	2	8	10	0	39	1	0.0135226	-14.45	66	0	0.131977	0.325	130.722	-2.92862	-9999	-9999
2016	2	8	10	30	39	1	0.0111237	-14	67	0	0.139015	0.325	144.678	-2.93157	-9999	-9999
2016	2	8	11	0	39	1	0.0113675	-13.3	65	0	0.142795	0.325	171.54	-2.93452	-9999	-9999
2016	2	8	11	30	39	1	0.0335019	-12.6	63	0	0.146488	0.325	124.366	-2.94081	0.0335019	-9999
2016	2	8	12	0	39	1	0.0144762	-12.4	63	0	0.148874	0.325	77.1913	-2.94709	0.0144762	-9999
2016	2	8	12	30	39	1	0.00952867	-12.2	63	0	0.151295	0.325	78.372	-2.951	0.00952867	-9999
2016	2	8	13	0	39	1	0.0371952	-11.95	63.5	0	0.155596	0.325	118.289	-2.95492	0.0371952	-9999
2016	2	8	13	30	39	1	0.0230039	-11.7	64	0	0.160002	0.325	46.602	-2.95308	0.0230039	-9999
2016	2	8	14	0	39	1	0.0075606	-11.8	63	0	0.156243	0.325	85.7338	-2.95123	0.0075606	-9999
2016	2	8	14	30	39	1	0.00613008	-11.9	62	0	0.152532	0.325	55.2587	-2.95773	0.00613008	-9999
2016	2	8	15	0	39	1	0.00915689	-12.4	63.5	0	0.150056	0.325	71.8585	-2.96423	0.00915689	-9999
2016	2	8	15	30	39	1	0.0133743	-12.9	65	0	0.147511	0.325	38.6398	-2.97861	0.0133743	-9999
2016	2	8	16	0	39	1	0.000972	-13.45	65.5	0	0.142147	0.325	5.42121	-2.99298	0.000972	-9999
2016	2	8	16	30	39	-9999	0.00375756	-14	66	0	0.13694	0.325	-6.64449	-2.97465	-9999	-9999
2016	2	8	17	0	39	-9999	0.00361903	-14.4	65.5	0	0.131517	0.325	-4.0602	-2.95632	-9999	-9999
2016	2	8	17	30	39	-9999	0.00372269	-14.8	65	0	0.126286	0.325	-5.2809	-2.94674	-9999	-9999
2016	2	8	18	0	39	-9999	0.00248885	-15.55	67	0	0.122341	0.325	-14.1121	-2.93717	-9999	-9999
2016	2	8	18	30	39	-9999	0.00287684	-16.3	69	0	0.118364	0.325	-17.7335	-2.9343	-9999	-9999
2016	2	8	19	0	39	-9999	0.00265445	-16.95	71	0	0.115338	0.325	-19.1444	-2.93144	-9999	-9999
2016	2	8	19	30	39	-9999	0.000442052	-17.6	73	0	0.112265	0.325	-23.2201	-2.92213	-9999	-9999
2016	2	8	20	0	39	-9999	-0.000465822	-19	75	0	0.10239	0.325	-29.26	-2.91283	-9999	-9999
2016	2	8	20	30	39	-9999	-0.000823099	-20.4	77	0	0.0931771	0.325	-29.7947	-2.90629	-9999	-9999
2016	2	8	21	0	39	-9999	-0.000767692	-21.35	78.5	0	0.0874508	0.325	-26.4608	-2.89975	-9999	-9999
2016	2	8	21	30	39	-9999	-0.00112279	-22.3	80	0	0.0819875	0.325	-24.7993	-2.88222	-9999	-9999
2016	2	8	22	0	39	-9999	-0.00119911	-23	80	0	0.0770628	0.325	-25.0252	-2.86469	-9999	-9999
2016	2	8	22	30	39	-9999	-0.00124373	-23.7	80	0	0.0724049	0.325	-22.0937	-2.84681	-9999	-9999
2016	2	8	23	0	39	-9999	-0.00111069	-24.4	78	0	0.0663011	0.325	-20.8262	-2.82892	-9999	-9999
2016	2	8	23	30	39	-9999	-0.000847824	-25.1	76	0	0.0606472	0.325	-13.2779	-2.8248	-9999	-9999
2016	2	9	0	0	40	-9999	-0.000771877	-25.6	75.5	0	0.0575762	0.2625	-11.3822	-2.82068	-9999	-9999
2016	2	9	0	30	40	-9999	-0.000896242	-26.1	75	0	0.0546468	0.2625	-9.61054	-2.86022	-9999	-9999
2016	2	9	1	0	40	-9999	-0.00029299	-26.55	75	0	0.0524411	0.2625	-6.35102	-2.89976	-9999	-9999
2016	2	9	1	30	40	-9999	5.56077e-05	-27	75	0	0.0503157	0.2625	-2.03948	-2.9001	-9999	-9999
2016	2	9	2	0	40	-9999	-0.00197057	-27.35	75	0	0.0487165	0.2625	13.6544	-2.90044	-0.00197057	-9999
2016	2	9	2	30	40	-9999	0.000109763	-27.7	75	0	0.0471631	0.2625	1.05143	-2.91054	-9999	-9999
2016	2	9	3	0	40	-9999	0.000257993	-28.05	74	0	0.0450457	0.2625	2.43265	-2.92065	-9999	-9999
2016	2	9	3	30	40	-9999	0.000305567	-28.4	73	0	0.0430108	0.2625	3.39616	-2.92679	-9999	-9999
2016	2	9	4	0	40	-9999	0.000376918	-28.7	73	0	0.0418213	0.2625	3.39616	-2.93293	-9999	-9999
2016	2	9	4	30	40	-9999	0.000376918	-29	73	0	0.0406615	0.2625	3.39616	-2.93308	-9999	-9999
2016	2	9	5	0	40	-9999	0.0049248	-28.9	73.5	0	0.041326	0.2625	3.39616	-2.93323	0.0049248	-9999
2016	2	9	5	30	40	-9999	0.000376918	-28.8	74	0	0.041999	0.2625	18.6429	-2.93472	-9999	-9999
2016	2	9	6	0	40	-9999	0.000257993	-28.3	74	0	0.0440087	0.2625	18.7768	-2.93621	-9999	-9999
2016	2	9	6	30	40	-9999	0.000257993	-27.8	74	0	0.0461045	0.2625	18.9107	-2.94393	-9999	-9999
2016	2	9	7	0	40	1	-5.184e-05	-27.2	74.5	0	0.0490669	0.2625	19.0446	-2.95165	-5.184e-05	-9999
2016	2	9	7	30	40	1	0.00214229	-26.6	75	0	0.052201	0.2625	3.2777	-2.93942	0.00214229	-9999
2016	2	9	8	0	40	1	0.000794083	-24.85	73.5	0	0.0599931	0.2625	20.6848	-2.92718	-9999	-9999
2016	2	9	8	30	40	1	-0.000926078	-23.1	72	0	0.0687432	0.2625	27.9126	-2.92784	-9999	-9999
2016	2	9	9	0	40	1	0.000375767	-20.75	67.5	0	0.0792361	0.2625	-6.26575	-2.9285	-9999	-9999
2016	2	9	9	30	40	1	0.0116834	-18.4	63	0	0.0905284	0.2625	70.2598	-2.92851	0.0116834	-9999
2016	2	9	10	0	40	1	0.0220009	-17	61.5	0	0.0994865	0.2625	104.837	-2.92852	0.0220009	-9999
2016	2	9	10	30	40	1	0.0232768	-15.6	60	0	0.109105	0.2625	109.749	-2.93144	0.0232768	-9999
2016	2	9	11	0	40	1	0.0128508	-14.65	57.5	0	0.113104	0.2625	103.393	-2.93437	0.0128508	-9999
2016	2	9	11	30	40	1	0.0110433	-13.7	55	0	0.116951	0.2625	138.17	-2.94065	0.0110433	-9999
2016	2	9	12	0	40	1	0.00954222	-13.1	52.5	0	0.117225	0.2625	112.41	-2.94693	0.00954222	-9999
2016	2	9	12	30	40	1	0.00736776	-12.5	50	0	0.117204	0.2625	95.3573	-2.95091	0.00736776	-9999
2016	2	9	13	0	40	1	0.00869616	-11.9	48	0	0.11809	0.2625	118.625	-2.9549	0.00869616	-9999
2016	2	9	13	30	40	1	0.0116504	-11.3	46	0	0.118746	0.2625	141.893	-2.95308	0.0116504	-9999
2016	2	9	14	0	40	1	0.0110851	-10.85	44.5	0	0.119073	0.2625	82.964	-2.95125	0.0110851	-9999
2016	2	9	14	30	40	1	0.00315576	-10.4	43	0	0.11925	0.2625	24.0347	-2.95771	0.00315576	-9999
2016	2	9	15	0	40	1	0.00172627	-10.8	44	0	0.118205	0.2625	31.8892	-2.96417	0.00172627	-9999
2016	2	9	15	30	40	1	0.00234382	-11.2	45	0	0.117096	0.2625	22.9669	-2.97855	-9999	-9999
2016	2	9	16	0	40	1	0.00296136	-12.25	49.5	0	0.118397	0.2625	14.0445	-2.99293	0.00296136	-9999
2016	2	9	16	30	40	-9999	-0.000273456	-13.3	54	0	0.11863	0.2625	-36.7396	-2.97463	-0.000273456	-9999
2016	2	9	17	0	40	-9999	0.0038323	-14.6	58	0	0.114558	0.2625	-3.754	-2.95632	-9999	-9999
2016	2	9	17	30	40	-9999	0.00248619	-15.9	62	0	0.109964	0.2625	-17.5737	-2.94682	-9999	-9999
2016	2	9	18	0	40	-9999	0.00199512	-17.25	67	0	0.106127	0.2625	-21.519	-2.93731	-9999	-9999
2016	2	9	18	30	40	-9999	-0.000382105	-18.6	72	0	0.101713	0.2625	-23.9995	-2.93441	-9999	-9999
2016	2	9	19	0	40	-9999	-0.000282408	-19.65	73.5	0	0.0948962	0.2625	-26.0239	-2.93152	-9999	-9999
2016	2	9	19	30	40	-9999	-0.000664236	-20.7	75	0	0.0884237	0.2625	-24.7024	-2.92229	-9999	-9999
2016	2	9	20	0	40	-9999	-0.000448406	-21.35	76.5	0	0.0852228	0.2625	-23.762	-2.91306	-9999	-9999
2016	2	9	20	30	40	-9999	-0.000575874	-22	78	0	0.0820785	0.2625	-21.7361	-2.90662	-9999	-9999
2016	2	9	21	0	40	-9999	-0.000732978	-22.25	76.5	0	0.078747	0.2625	-21.5342	-2.90018	-9999	-9999
2016	2	9	21	30	40	-9999	-0.000686044	-22.5	75	0	0.0755179	0.2625	-23.6247	-2.88256	-9999	-9999
2016	2	9	22	0	40	-9999	-0.000628552	-23.45	76	0	0.0703367	0.2625	-23.3361	-2.86494	-9999	-9999
2016	2	9	22	30	40	-9999	-0.000870701	-24.4	77	0	0.0654511	0.2625	-20.8967	-2.84704	-9999	-9999
2016	2	9	23	0	40	-9999	-0.0039204	-24.5	76	0	0.0640224	0.2625	-34.4517	-2.82914	-0.0039204	-9999
2016	2	9	23	30	40	-9999	-0.000726078	-24.6	75	0	0.0626136	0.2625	-19.423	-2.82505	-9999	-9999
2016	2	10	0	0	41	-9999	-0.000713627	-24.95	75.5	0	0.0610713	0.2	-15.0767	-2.82097	-9999	-9999
2016	2	10	0	30	41	-9999	-0.000671519	-25.3	76	0	0.0595582	0.2	-13.227	-2.86059	-9999	-9999
2016	2	10	1	0	41	-9999	-0.00042221	-25.75	75.5	0	0.0567956	0.2	-9.83481	-2.9002	-9999	-9999
2016	2	10	1	30	41	-9999	-0.000410809	-26.2	75	0	0.0541495	0.2	-6.79735	-2.90055	-9999	-9999
2016	2	10	2	0	41	-9999	0.000312174	-26.5	74.5	0	0.0523309	0.2	-3.06497	-2.90089	-9999	-9999
2016	2	10	2	30	41	-9999	0.000363145	-26.8	74	0	0.0505672	0.2	-0.979553	-2.91099	-9999	-9999
2016	2	10	3	0	41	-9999	0.000312174	-26.5	75.5	0	0.0530334	0.2	-3.06497	-2.9211	-9999	-9999
2016	2	10	3	30	41	-9999	-0.000410809	-26.2	77	0	0.0555935	0.2	-6.79735	-2.92715	-9999	-9999
2016	2	10	4	0	41	-9999	-0.000617926	-25.2	77	0	0.0608913	0.2	-12.7968	-2.9332	-9999	-9999
2016	2	10	4	30	41	-9999	-0.000589745	-24.2	77	0	0.0666379	0.2	-22.6517	-2.93334	-9999	-9999
2016	2	10	5	0	41	-9999	-0.000764597	-23.65	76	0	0.0690926	0.2	-22.9362	-2.93348	-9999	-9999
2016	2	10	5	30	41	-9999	-0.0011016	-23.1	75	0	0.0716075	0.2	-8.32992	-2.93498	-0.0011016	-9999
2016	2	10	6	0	41	-9999	-0.00047775	-23.3	75	0	0.0703449	0.2	-8.83437	-2.93649	-9999	-9999
2016	2	10	6	30	41	-9999	-0.000764597	-23.5	75	0	0.0691024	0.2	-9.33882	-2.94431	-9999	-9999
2016	2	10	7	0	41	1	-0.000408476	-22.85	75	0	0.0732142	0.2	-9.84327	-2.95212	-9999	-9999
2016	2	10	7	30	41	1	-0.000744176	-22.2	75	0	0.077544	0.2	-6.16841	-2.93991	-9999	-9999
2016	2	10	8	0	41	1	-0.0111943	-21.15	73.5	0	0.083324	0.2	-2.48674	-2.92769	-0.0111943	-9999
2016	2	10	8	30	41	1	-0.0112941	-20.1	72	0	0.0894192	0.2	1.19492	-2.9284	-0.0112941	-9999
2016	2	10	9	0	41	1	0.00290313	-16.5	67.5	0	0.11387	0.2	27.7366	-2.9291	-9999	-9999
2016	2	10	9	30	41	1	0.0171003	-12.9	63	0	0.142972	0.2	53.8965	-2.9291	0.0171003	-9999
2016	2	10	10	0	41	1	0.0065497	-11.05	60	0	0.158009	0.2	-11.0265	-2.9291	-9999	-9999
2016	2	10	10	30	41	1	-0.00400093	-9.2	57	0	0.173778	0.2	-75.9495	-2.93204	-0.00400093	-9999
2016	2	10	11	0	41	1	-0.00192338	-8.3	55.5	0	0.181544	0.2	131.944	-2.93498	-9999	-9999
2016	2	10	11	30	41	1	0.000154165	-7.4	54	0	0.189415	0.2	80.0751	-2.94127	-9999	-9999
2016	2	10	12	0	41	1	0.00223171	-6.5	51	0	0.19173	0.2	47.9732	-2.94755	0.00223171	-9999
2016	2	10	12	30	41	1	0.00744794	-5.6	48	0	0.1933	0.2	145.055	-2.95152	0.00744794	-9999
2016	2	10	13	0	41	1	0.00895803	-4.95	47	0	0.198846	0.2	122.897	-2.95548	0.00895803	-9999
2016	2	10	13	30	41	1	0.00855456	-4.3	46	0	0.204404	0.2	54.924	-2.95362	-9999	-9999
2016	2	10	14	0	41	1	0.00815109	-4.25	45.5	0	0.202945	0.2	45.2564	-2.95176	0.00815109	-9999
2016	2	10	14	30	41	1	0.00625385	-4.2	45	0	0.201471	0.2	84.7766	-2.95826	0.00625385	-9999
2016	2	10	15	0	41	1	0.00508745	-4.65	46	0	0.199081	0.2	65.2497	-2.96477	0.00508745	-9999
2016	2	10	15	30	41	1	0.00376164	-5.1	47	0	0.1966	0.2	37.3315	-2.97908	0.00376164	-9999
2016	2	10	16	0	41	1	0.0021384	-6.8	53.5	0	0.196547	0.2	-12.6277	-2.99339	0.0021384	-9999
2016	2	10	16	30	41	-9999	-0.000718632	-8.5	60	0	0.193226	0.2	-62.5869	-2.97509	-0.000718632	-9999
2016	2	10	17	0	41	-9999	0.0039108	-9.55	63	0	0.186856	0.2	-3.33132	-2.95679	-9999	-9999
2016	2	10	17	30	41	-9999	0.00507251	-10.6	66	0	0.180151	0.2	3.82977	-2.9472	-9999	-9999
2016	2	10	18	0	41	-9999	0.00441836	-11.1	68.5	0	0.179676	0.2	4.1186	-2.9376	-9999	-9999
2016	2	10	18	30	41	-9999	0.00413651	-11.6	71	0	0.178932	0.2	0.0118835	-2.93475	-9999	-9999
2016	2	10	19	0	41	-9999	0.00475789	-12.5	73	0	0.171117	0.2	0.03554	-2.9319	-9999	-9999
2016	2	10	19	30	41	-9999	0.00437845	-13.4	75	0	0.163428	0.2	-2.70129	-2.92271	-9999	-9999
2016	2	10	20	0	41	-9999	0.00454669	-13.25	75	0	0.165435	0.2	-1.33198	-2.91352	-9999	-9999
2016	2	10	20	30	41	-9999	0.00462025	-13.1	75	0	0.167465	0.2	-1.0512	-2.90701	-9999	-9999
2016	2	10	21	0	41	-9999	0.00454669	-13.25	75	0	0.165435	0.2	-1.33198	-2.90051	-9999	-9999
2016	2	10	21	30	41	-9999	0.00437845	-13.4	75	0	0.163428	0.2	-2.70129	-2.88299	-9999	-9999
2016	2	10	22	0	41	-9999	0.00454669	-13.25	75	0	0.165435	0.2	-1.33198	-2.86547	-9999	-9999
2016	2	10	22	30	41	-9999	0.00462025	-13.1	75	0	0.167465	0.2	-1.0512	-2.84757	-9999	-9999
2016	2	10	23	0	41	-9999	0.00454669	-13.2	74.5	0	0.165002	0.2	-1.33198	-2.82968	-9999	-9999
2016	2	10	23	30	41	-9999	0.0044578	-13.3	74	0	0.162567	0.2	-1.91386	-2.82558	-9999	-9999
2016	2	11	0	0	42	-9999	0.00411889	-14.25	76	0	0.154491	0.2	-0.99294	-2.82148	-9999	-9999
2016	2	11	0	30	42	-9999	0.00402049	-15.2	78	0	0.146618	0.2	-5.38056	-2.86071	-9999	-9999
2016	2	11	1	0	42	-9999	0.00307005	-15.85	80	0	0.142481	0.2	-14.9514	-2.89994	-9999	-9999
2016	2	11	1	30	42	-9999	0.0031279	-16.5	82	0	0.138331	0.2	-17.1805	-2.90029	-9999	-9999
2016	2	11	2	0	42	-9999	0.00239469	-17.2	82	0	0.130435	0.2	-20.5096	-2.90063	-9999	-9999
2016	2	11	2	30	42	-9999	-0.000207593	-17.9	82	0	0.122944	0.2	-21.7405	-2.91074	-9999	-9999
2016	2	11	3	0	42	-9999	-0.000461962	-18.2	82	0	0.119853	0.2	-22.8422	-2.92085	-9999	-9999
2016	2	11	3	30	42	-9999	-0.000333604	-18.5	82	0	0.116831	0.2	-22.1957	-2.92693	-9999	-9999
2016	2	11	4	0	42	-9999	-0.000280228	-18.65	82	0	0.115346	0.2	-23.1038	-2.93301	-9999	-9999
2016	2	11	4	30	42	-9999	-0.000280228	-18.8	82	0	0.113878	0.2	-23.1038	-2.93314	-9999	-9999
2016	2	11	5	0	42	-9999	-0.000279114	-19.2	81.5	0	0.109374	0.2	-26.1414	-2.93327	-9999	-9999
2016	2	11	5	30	42	-9999	-0.000178652	-19.6	81	0	0.105031	0.2	-24.7211	-2.93477	-9999	-9999
2016	2	11	6	0	42	-9999	-0.000178652	-19.75	80.5	0	0.103042	0.2	-24.1226	-2.93628	-9999	-9999
2016	2	11	6	30	42	-9999	-0.00029388	-19.9	80	0	0.101086	0.2	-27.5192	-2.94407	-9999	-9999
2016	2	11	7	0	42	1	-0.000326462	-19.45	79	0	0.103767	0.2	-26.506	-2.95186	-0.000326462	-9999
2016	2	11	7	30	42	1	0.00136534	-19	78	0	0.106486	0.2	30.4944	-2.93963	0.00136534	-9999
2016	2	11	8	0	42	1	0.00122148	-17.35	77	0	0.120943	0.2	27.0418	-2.9274	0.00122148	-9999
2016	2	11	8	30	42	1	0.00114858	-15.7	76	0	0.137056	0.2	55.1467	-2.92807	-9999	-9999
2016	2	11	9	0	42	1	0.00107568	-13.25	70	0	0.154406	0.2	66.4194	-2.92875	0.00107568	-9999
2016	2	11	9	30	42	1	-0.00282827	-10.8	64	0	0.171935	0.2	88.7942	-2.92875	-9999	-9999
2016	2	11	10	0	42	1	-0.00673222	-9	60	0	0.185816	0.2	-34.6847	-2.92875	-0.00673222	-9999
2016	2	11	10	30	42	1	-0.00729952	-7.2	56	0	0.199488	0.2	-0.67552	-2.93168	-0.00729952	-9999
2016	2	11	11	0	42	1	0.00579001	-5.8	53	0	0.210207	0.2	79.4087	-2.93462	0.00579001	-9999
2016	2	11	11	30	42	1	0.0057996	-4.4	50	0	0.220512	0.2	72.9696	-2.94091	0.0057996	-9999
2016	2	11	12	0	42	1	0.0166382	-3.05	49.5	0	0.241544	0.2	66.5304	-2.94719	-9999	-9999
2016	2	11	12	30	42	1	0.0274768	-1.7	49	0	0.264253	0.2	123.837	-2.95114	0.0274768	-9999
2016	2	11	13	0	42	1	0.0235624	-0.1	45	0	0.272823	0.2	77.8077	-2.9551	0.0235624	-9999
2016	2	11	13	30	42	1	0.0237899	1.5	41	0	0.279014	0.2	51.519	-2.95326	0.0237899	-9999
2016	2	11	14	0	42	1	0.0252135	1.5	41.5	0	0.282417	0.2	43.8019	-2.95142	-9999	-9999
2016	2	11	14	30	42	1	0.0266371	1.5	42	0	0.285819	0.2	36.0848	-2.9579	0.0266371	-9999
2016	2	11	15	0	42	1	0.0154673	1.2	43	0	0.286387	0.2	13.5917	-2.96439	0.0154673	-9999
[truncated: 33,089 more rows]
